# Supplementary material
Source: PubMed Central journal article supplement (PMC4711365)
Supplement: NIHMS741699-supplement-Supporting_Information.pdf [file NIHMS741699-supplement-Supporting_Information.pdf]

# Development of a Pd-Catalyzed Enantioselective Carboalkoxylation Reaction for the Synthesis of Tetrahydrofurans

**Brett A. Hopkins, Zachary J. Garlets and John P. Wolfe\***

*Department of Chemistry, University of Michigan, 930 N. University Avenue, Ann Arbor, Michigan 48109-1055*

## Supporting Information

Experimental procedures and characterization data for new compounds.

## Table of Contents

|                                                                       |     |
|-----------------------------------------------------------------------|-----|
| General Considerations                                                | S1  |
| Synthesis of Substrates                                               | S2  |
| Synthesis of <b>L7</b>                                                | S5  |
| Asymmetric Pd-Catalyzed Carboalkoxylation Reactions                   | S8  |
| Assignment of Absolute Stereochemistry                                | S20 |
| Screen of Chiral TADDOL-derived Phosphite Ligands                     | S21 |
| References                                                            | S22 |
| Copies of $^1\text{H}$ , $^{13}\text{C}$ NMR spectra, and HPLC traces | S23 |

**General:** Reactions were carried out under nitrogen in flame-dried glassware. Tris(dibenzylideneacetone)dipalladium was purchased from Strem Chemical Co. and used without further purification. Dichloromethane and toluene were purified using a GlassContour solvent system. Anhydrous dioxane was purchased from Acros Organics

in a sure seal bottle and used as received. All other solvents and aryl halides were purchased from commercial sources and used as received. 1-(But-3-en-1-yl)cyclopentan-1-ol (**1a**),<sup>[1]</sup> 2,5-dimethylhex-5-en-2-ol (**1d**),<sup>[1]</sup> and (+)-(1*S*,2*R*)-2-phenylcyclohexan-1-ol,<sup>[2]</sup> 4-methyl-2,2-diphenylpent-4-en-1-ol (**5**),<sup>[3]</sup> and ligands **L1–L6**<sup>[4]</sup> were synthesized according to literature procedures. 4-Penten-1-ol (**1b**) was purchased from commercial sources and was used without further purification. Yields refer to isolated compounds that are estimated to be  $\geq 95\%$  pure as judged by <sup>1</sup>H NMR or GC analysis unless stated otherwise. The yields reported in the supporting information describe the result of a single experiment, whereas yields reported in Tables 2 and 3 are average yields of two or more experiments. Thus, the yields reported in the supporting information may differ from those in the manuscript.

### Synthesis of Substrates:

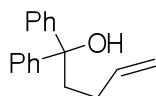

**1,1-Diphenylpent-4-en-1-ol (1c).**<sup>[5]</sup> A flame dried round bottom flask equipped with a stir bar was cooled under a stream of nitrogen and charged with 4-pentenoyl chloride (5 mmol, 0.55 mL) and diethyl ether (50 mL). The mixture was cooled to 0 °C in an ice bath for five min and then PhMgBr (20 mL, 20 mmol, 1M in THF) was added dropwise to the flask. The resulting mixture was warmed to rt and stirred for 12 h, then the flask was cooled to 0 °C in an ice bath and slowly quenched with saturated aqueous ammonium chloride (10 mL). The mixture was transferred to a separatory funnel, the layers were separated, and the aqueous layer was extracted with ethyl acetate (3 x 25 mL). The organic layers were combined, dried over anhydrous sodium sulfate, filtered,

and concentrated in vacuo. The crude product was then purified by flash chromatography on silica gel to afford the title compound (864 mg, 72%) as a colorless oil.  $^1\text{H}$  NMR (500 MHz,  $\text{CDCl}_3$ )  $\delta$  7.43 (d,  $J = 7.4$  Hz, 4 H), 7.33 (t,  $J = 8.1$  Hz, 4 H), 7.24 (t,  $J = 6.6$  Hz, 2 H), 6.85–6.78 (m, 2 H), 5.06–4.96 (m, 2 H), 2.44–2.38 (m, 2 H), 2.18 (s, 1 H), 2.12–2.04 (m, 2 H). Spectroscopic data was consistent with that previously reported in the literature.<sup>[5]</sup>

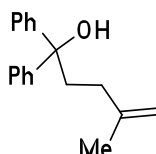

**4-Methyl-1,1-diphenylpent-4-en-1-ol (1e).** A flame dried round bottom flask equipped with a stir bar was cooled under a stream of nitrogen and charged with  $\text{PhMgBr}$  (25 mL, 25 mmol, 1M in THF). The solution was cooled to 0 °C in an ice bath for five min. In a separate flask ethyl 4-methylpent-4-enoate<sup>[6]</sup> (1.0 g, 7 mmol) was dissolved in 20 mL anhydrous THF, and the resulting solution was added dropwise to the flask containing the cooled  $\text{PhMgBr}$  solution. The reaction mixture was then warmed to rt, stirred for 12 h, then was cooled to 0 °C in an ice bath and slowly quenched with saturated aqueous ammonium chloride (20 mL). The resulting mixture was transferred to a separatory funnel, the layers were separated, and the aqueous layer was extracted with diethyl ether (3x25 mL). The organic layers were combined, dried over anhydrous sodium sulfate, filtered, and concentrated in vacuo. The crude product was then purified by flash chromatography on silica gel to afford the title compound (1.54 g, 88%) as a colorless oil.  $^1\text{H}$  NMR (500 MHz,  $\text{CDCl}_3$ )  $\delta$  7.43 (dd,  $J = 8.31, 0.98$  Hz, 4 H), 7.34–7.31 (m, 4H), 7.25–7.20 (m, 2 H), 4.73 (s, 1 H), 4.70 (s, 1 H), 2.48–2.42 (m, 2 H), 2.25 (s, br,

1 H), 2.06–1.99 (m, 2 H), 1.74 (s, 3 H);  $^{13}\text{C}$  NMR (175 MHz,  $\text{CDCl}_3$ )  $\delta$  147.1, 146.4, 128.4, 127.0, 126.2, 110.1, 78.5, 40.0, 32.2, 23.0; IR (film) 3469, 2932, 1446  $\text{cm}^{-1}$ ; MS (EI) 252.1515 (252.1514 calcd for  $\text{C}_{18}\text{H}_{20}\text{O}$ , M +).

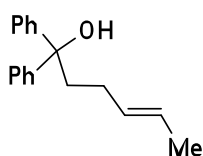

**(E)-1,1-Diphenylhex-4-en-1-ol (1f).** The title compound was prepared from  $\text{PhMgBr}$  (50 mL, 50 mmol, 1M in THF) and (*E*)-ethyl hex-4-enoate<sup>[7]</sup> (2.28 g, 16.0 mmol) using a procedure analogous to that described above for the synthesis of **1e**. This procedure afforded the title compound (1.23 g, 30%) as a colorless solid, mp 53–54 °C:  $^1\text{H}$  NMR (500 MHz,  $\text{CDCl}_3$ )  $\delta$  7.40–7.43 (m, 4 H), 7.28–7.33 (m, 4 H), 7.20–7.24 (m, 2 H), 5.37–5.51 (m, 2 H), 2.33–2.38 (m, 2 H), 2.23 (s, 1 H), 1.96–2.03 (m, 2 H), 1.63 (dd,  $J = 5.9$ , 1.0 Hz, 3 H);  $^{13}\text{C}$  NMR (175 MHz,  $\text{CDCl}_3$ )  $\delta$  147.2, 131.3, 128.3, 127.0, 126.2, 125.7, 78.6, 41.7, 27.3, 18.1; IR (film) 3556, 2958, 1446  $\text{cm}^{-1}$ ; MS (EI) 252.1510 (252.1514 calcd for  $\text{C}_{18}\text{H}_{20}\text{O}$ , M +).

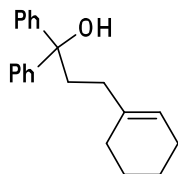

**3-(Cyclohex-1-en-1-yl)-1,1-diphenylpropan-1-ol (1g).** The title compound was prepared from  $\text{PhMgBr}$  (11 mL, 11 mmol, 1M in THF) and 3-(cyclohex-1-en-1-yl)-1-phenylpropan-1-one<sup>[8]</sup> (1.2 g, 5.5 mmol) using a procedure analogous to that described above for the synthesis of **1e**. This procedure afforded the title compound (600 mg,

37%) as a colorless oil.  $^1\text{H}$  NMR (500 MHz,  $\text{CDCl}_3$ )  $\delta$  7.39–7.49 (m, 4 H), 7.28–7.34 (m, 4 H), 7.18–7.24 (m, 2 H), 5.41 (s, 1 H), 2.38–2.45 (m, 2 H), 2.37 (s, 1 H), 1.88–2.03 (m, 6 H), 1.48–1.67 (m, 4 H);  $^{13}\text{C}$  NMR (175 MHz,  $\text{CDCl}_3$ )  $\delta$  147.2, 138.2, 128.3, 126.9, 126.2, 121.6, 78.7, 39.8, 32.5, 28.7, 25.4, 23.1, 22.7; IR (film) 3467, 2923, 1446  $\text{cm}^{-1}$ ; MS (EI) 292.1823 (292.1827 calcd for  $\text{C}_{21}\text{H}_{24}\text{O}$ , M +).

### Synthesis of ligand L7.

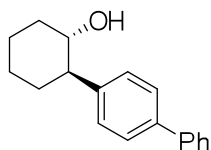

**(-)-(1S,2R)-2-[(1,1'-Biphenyl)-4-yl]cyclohexan-1-ol (S1).** A flame-dried 2-neck round bottom flask equipped with a stirbar and a reflux condenser was cooled under a stream of nitrogen and charged with magnesium turnings (1.76 g, 72 mmol) and THF (50 mL). A solution of 4-bromobiphenyl (11.65 g, 50 mmol) in THF (15 mL) was slowly added. The reaction mixture began to rapidly reflux, and the reaction temperature was controlled by placing the flask in an ice bath until reflux subsided. Once the magnesium turnings had disappeared, the reaction mixture was cooled to  $-20\text{ }^{\circ}\text{C}$  for 10 min then  $\text{CuCl}$  (8 mol%) was added to the reaction mixture immediately followed by the addition of cyclohexene oxide (3.36 mL, 33.3 mmol) as a solution in THF (7 mL). The resulting mixture was allowed to slowly warm to rt and stirred for 4 h. The mixture was then cooled to  $0\text{ }^{\circ}\text{C}$  and quenched with saturated ammonium chloride (1 mL/mmol cyclohexene oxide). The mixture was filtered through a pad of celite, and transferred to a separatory funnel. The layers were separated and the aqueous layer was extracted with ethyl acetate (3x). The combined organic layers were then dried over sodium

sulfate, filtered, and concentrated in vacuo. The crude product was purified by flash chromatography on silica gel to afford 4.00 g (48 %) of ( $\pm$ )-**S1** as a white solid.

A flame dried round bottom flask equipped with a stirbar was cooled under a stream of nitrogen and charged with PS 30 Amano Lipase (14.8 mg), ( $\pm$ )-**S1** (3.74 g, 14.8 mmol) and *tert*-butyl methyl ether (45 mL). Neat vinyl acetate (13.6 mL, 148 mmol) was then added and the resulting mixture was stirred at rt until one enantiomer of the alcohol had been consumed as judged by chiral HPLC analysis (3 days). The mixture was then filtered through a fritted funnel and the enzyme was washed with diethyl ether and then recycled for future use (if desired). The resulting solution was concentrated in vacuo and the crude product was purified by flash chromatography on silica gel to afford 1.72 g (46%) of the title compound as a white solid, mp 122–125 °C. This material was judged to be >99:1 er by chiral HPLC analysis (Chiracel OJH, 25 cm x 4.6 mm, 4% IPA/Hexanes, 1.00 mL/min,  $\lambda$  254 nm, RT= 21.8 and 25.0 min).  $[\alpha]_D^{23}$  -13.99 (c 3.38, CH<sub>2</sub>Cl<sub>2</sub>); <sup>1</sup>H NMR (700 MHz, CDCl<sub>3</sub>)  $\delta$  7.62–7.57 (m, 4 H), 7.45 (t, *J* = 7.7 Hz, 2 H), 7.37–7.34 (m, 3 H), 3.72 (td, *J* = 10.0, 4.2 Hz, 1 H), 2.51 (td, *J* = 11.1, 3.6 Hz, 1 H), 2.1–2.15 (m, 1 H), 1.95–1.88 (m, 2 H), 1.81 (app. d, *J* = 13.2 Hz, 1 H), 1.64–1.35 (m, 5 H); <sup>13</sup>C NMR (175 MHz CDCl<sub>3</sub>)  $\delta$  142.6, 141.1, 140.0, 128.9, 128.5, 127.7, 127.3, 127.2, 74.6, 53.1, 34.5, 33.5, 26.2, 25.3; IR (film) 3548, 2919, 1490 cm<sup>-1</sup>; MS (ESI+) 270.1850 (270.1852 calcd for C<sub>18</sub>H<sub>20</sub>O, M + NH<sub>4</sub><sup>+</sup>).

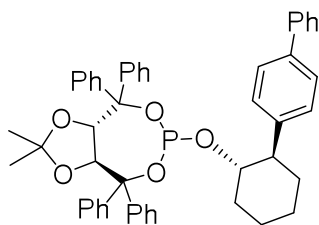

**(+)-(1*S*,2*R*,3*aS*,8*aS*)-6-{-2-([1,1'-Biphenyl]-4-yl)cyclohexyl}oxy}-2',2'-dimethyl-4,4,8,8-Tetraphenyltetrahydro-[1,3]dioxolo[4,5-*e*][1,3,2]dioxaphosphepine (L7).**

The ligand was prepared according to a previously reported procedure for the synthesis of chiral phosphites.<sup>[4]</sup> A flame dried round bottom flask equipped with a stirbar was cooled under a stream of nitrogen and charged with (1*S*,2*R*)-2-([1,1'-biphenyl]-4-yl)cyclohexan-1-ol (255 mg, 1.01 mmol), and dry dichloromethane (2 mL). Neat PCl<sub>3</sub> (86 μL, 1.01 mmol), was added and the resulting mixture was allowed to stir for 1 h at rt. After this time, anhydrous NEt<sub>3</sub> (0.56 mL, 4.04 mmol) was added dropwise and the mixture was stirred at rt for 30 min. A solution of (*S,S*)-TADDOL (450 mg, 0.963 mmol) in dichloromethane (2 mL) was added, and the reaction mixture was stirred at rt for 12 h. The mixture was then diluted with diethyl ether (20 mL) and then filtered through celite. The solvent was evaporated in vacuo and the crude product was purified by flash chromatography on silica gel to afford 520 mg (72%) of the title compound as a white foamy solid, mp 115–118 °C.  $[\alpha]_D^{23} +130.0$  (c 5.81, CH<sub>2</sub>Cl<sub>2</sub>); <sup>1</sup>H NMR (700 MHz, CDCl<sub>3</sub>) δ 7.51 (d, *J* = 7.9 Hz, 2 H), 7.38–7.02 (m, 27 H), 4.94–4.90 (m, 1 H), 4.88 (d, *J* = 8.4 Hz, 1 H), 4.56 (app. qd, *J* = 9.9, 3.7 Hz, 1 H), 2.71–2.66 (m, 1 H), 2.28 (app. d, *J* = 13.8 Hz, 1 H), 1.95 (app. d, *J* = 13.2 Hz, 1 H), 1.81–1.73 (m, 2 H), 1.69–1.50 (m, 2 H), 1.41–1.31 (m, 2 H), 1.19 (s, 3 H), 0.30 (s, 3 H); <sup>13</sup>C NMR (175 MHz CDCl<sub>3</sub>) δ 146.6, 146.1, 143.0, 141.8, 141.25, 141.23, 139.4, 129.4, 129.0, 128.92, 128.89, 128.6, 128.0, 127.8, 127.54, 127.48, 127.45, 127.38, 127.34, 127.30, 127.18, 127.15, 127.12, 127.06, 126.9, 112.0, 82.9, 82.7, 82.6, 82.12, 82.10, 81.92, 81.88, 78.10, 78.09, 51.39, 51.37, 35.7, 33.8, 27.6, 26.0, 25.5, 25.3 (due to the complexity of the spectra all the peaks are listed without assigning C-P couplings); <sup>31</sup>P NMR (202 MHz CDCl<sub>3</sub>) δ 140.6; IR (film)

2932, 1486, 1447  $\text{cm}^{-1}$ ; MS (ESI+) 747.3224 (747.3234 calcd for  $\text{C}_{49}\text{H}_{47}\text{O}_5\text{P}$ ,  $\text{M} + \text{H}^+$ ).

**General procedure for asymmetric Pd-catalyzed carboalkoxylation reactions.** A flame-dried Schlenk tube equipped with a stirbar was cooled under a stream of nitrogen and charged with  $\text{Pd}_2(\text{dba})_3$  (2 mol %), **L7** (5 mol %), the alcohol substrate (1.0 equiv), and  $\text{NaO}^t\text{Bu}$  (1.50–2.0 equiv). The flask was purged with  $\text{N}_2$  then the aryl or alkenyl halide (1.40–2.0 equiv), and dioxane or toluene (0.10 M) was added. The resulting mixture was heated to 90 °C with stirring until the starting material had been consumed as judged by TLC analysis (ca. 12 h). The reaction mixture was then cooled to rt, saturated aqueous ammonium chloride (6 mL/mmol substrate) was added, and the mixture was transferred to a separatory funnel. The mixture was extracted with ethyl acetate (3 x 5 mL) then the combined organic layers were dried over anhydrous  $\text{Na}_2\text{SO}_4$ , filtered, and concentrated in vacuo. The crude product was purified by flash chromatography on silica gel.

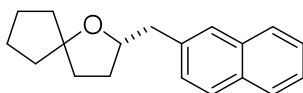

**(+)-(S)-2-(Naphthalen-2-ylmethyl)-1-oxaspiro[4.4]nonane (2a).** The general procedure was employed for the coupling of 1-(but-3-en-1-yl)cyclopentan-1-ol (28.0 mg, 0.20 mmol) and 2-bromonaphthalene (75.0 mg, 0.36 mmol) using a catalyst composed of  $\text{Pd}_2(\text{dba})_3$  (3.7 mg, 0.004 mmol) and **L7** (7.5 mg, 0.010 mmol), a reaction temperature of 90 °C and a reaction time of 12 h in 2mL of dioxane. This procedure afforded the title compound (31.1 mg, 58%, 10:1 regioselectivity) as a colorless oil:  $[\alpha]_D^{23} +12.4$ (c 2.1,  $\text{CH}_2\text{Cl}_2$ );  $^1\text{H}$  NMR (500 MHz,  $\text{CDCl}_3$ )  $\delta$  7.85–7.79 (m, 3 H), 7.67 (s, 1 H), 7.49–7.35 (m, 3



H), 4.29–4.22 (m, 1 H), 3.15 (dd,  $J = 13.6, 5.0$  Hz, 1 H), 2.87 (dd,  $J = 13.3, 7.7$  Hz, 1 H), 1.95–1.87(m, 1 H), 1.86–1.49 (m, 11 H);  $^{13}\text{C}$  NMR (125 MHz,  $\text{CDCl}_3$ )  $\delta$  136.6, 133.7, 132.3, 128.4, 127.84, 127.79, 127.75, 127.7, 91.6, 79.2, 43.0, 39.4, 38.6, 36.6, 24.2; IR (film) 2953, 2361, 2338, 1508  $\text{cm}^{-1}$ . MS (CI) 267.1743 (267.1743 calcd for  $\text{C}_{19}\text{H}_{22}\text{O}$ ,  $\text{M} + \text{H}^+$ ). The enantiopurity was determined to be 89:11 er by chiral HPLC analysis (Chiralcel OJH, 25 cm x 4.6 mm, 1% IPA/Hexanes, 1.00 mL/min,  $\lambda$  254 nm, RT= 10.5 and 12.8 min).

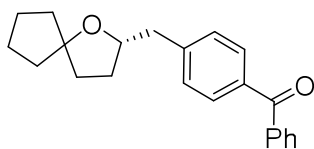

**(+)-(S)-2-(Naphthalen-2-ylmethyl)-1-oxaspiro[4.4]nonane (2b).** The general procedure was employed for the coupling of 1-(but-3-en-1-yl)cyclopentan-1-ol (28 mg, 0.20 mmol) and 4-bromobenzophenone (94 mg, 0.36 mmol) using a catalyst composed of  $\text{Pd}_2(\text{dba})_3$  (3.7 mg, 0.004 mmol) and **L7** (7.5 mg, 0.010 mmol), a reaction temperature of 90 °C, and a reaction time of 12 h in 2mL of dioxane. This procedure afforded the title compound (34.6 mg, 53%, 6:1 regioselectivity) as a clear oil:  $[\alpha]_D^{23} +21.9$  (c 1.77,  $\text{CH}_2\text{Cl}_2$ );  $^1\text{H}$  NMR (500 MHz,  $\text{CDCl}_3$ )  $\delta$  7.80–7.77 (m, 2 H), 7.74 (d,  $J = 8.1$  Hz, 2 H), 7.57 (t,  $J = 7.3$  Hz, 1 H), 7.49–7.45 (m, 2 H), 7.34 (d,  $J = 8.3$  Hz, 2 H), 4.19 (app. quint,  $J = 6.6$  Hz, 1 H), 3.01 (dd,  $J = 13.4, 5.6$  Hz, 1 H), 2.80 (dd,  $J = 13.4, 6.8$  Hz, 1 H), 1.96–1.90 (m, 1 H), 1.83–1.48 (m, 11 H);  $^{13}\text{C}$  NMR (125 MHz,  $\text{CDCl}_3$ )  $\delta$  196.5, 144.1, 137.9, 132.2, 130.1, 129.9, 129.4, 128.3, 128.2, 127.6, 91.5, 78.5, 42.7, 39.2, 38.4, 36.4, 31.3, 24.0, 23.9; IR (film) 2959, 1655, 1606, 1277  $\text{cm}^{-1}$ . MS (CI) 321.1848 (321.1849 calcd for  $\text{C}_{22}\text{H}_{24}\text{O}_2$ ,  $\text{M} + \text{H}^+$ ). The enantiopurity was determined to be 82:18 er by chiral HPLC

analysis (Chiralcel ADH, 25 cm x 4.6 mm, 1% IPA/Hexanes, 1.00 mL/min,  $\lambda$  254 nm, RT= 17.4 and 18.4 min).

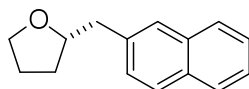

**(+)-(S)-2-(Naphthalen-2-ylmethyl)tetrahydrofuran (2c).** The general procedure was employed for the coupling of pent-4-en-1-ol (17 mg, 0.20 mmol) and 2-bromonaphthalene (58 mg, 0.28 mmol) using a catalyst composed of  $\text{Pd}_2(\text{dba})_3$  (3.7 mg, 0.004 mmol) and **L7** (7.5 mg, 0.010 mmol), a reaction temperature of 90 °C, and a reaction time of 12 h in 2mL of dioxane. This procedure afforded the title compound (9.9 mg, 23%) as a light yellow oil.  $[\alpha]_D^{23} = +2.1$  ( $c$  0.95,  $\text{CH}_2\text{Cl}_2$ );  $^1\text{H NMR}$  (500 MHz,  $\text{CDCl}_3$ )  $\delta$  7.83–7.75 (m, 3 H), 7.68 (s, 1 H), 7.48–7.36 (m, 3 H), 4.18 (app. quint,  $J = 6.5$  Hz, 1 H), 3.95–3.89 (m, 1 H), 3.79–3.73 (m, 1 H), 3.08 (dd,  $J = 13.5, 6.4$  Hz, 1 H), 2.92 (dd,  $J = 13.7, 6.4$  Hz, 1 H), 1.98–1.82 (m, 3 H), 1.66–1.57 (m, 1 H). Other spectroscopic data matched those previously reported.<sup>[1]</sup> The enantiopurity was determined to be 58:42 er by chiral HPLC analysis (Chiralcel OJH, 25 cm x 4.6 mm, 1% IPA/Hexanes, 1.50 mL/min,  $\lambda$  254 nm, RT= 19.8 and 26.1 min).

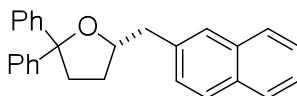

**(+)-(S)-5-(Naphthalen-2-ylmethyl)-2,2-diphenyltetrahydrofuran (2d).** The general procedure was employed for the coupling of 1,1-diphenylpent-4-en-1-ol (48 mg, 0.20 mmol) and 2-bromonaphthalene (58 mg, 0.28 mmol) using a catalyst composed of  $\text{Pd}_2(\text{dba})_3$  (3.7 mg, 0.004 mmol) and **L7** (7.5 mg, 0.010 mmol), a reaction temperature of

90 °C and a reaction time of 12 h in 2mL of dioxane. This procedure afforded the title compound (48.7mg, 67%) as a white solid, mp 83–86 °C.  $[\alpha]_D^{23} +29.6$  (c 4.24, CH<sub>2</sub>Cl<sub>2</sub>); <sup>1</sup>H NMR (500 MHz, CDCl<sub>3</sub>) δ 7.86 (d, *J* = 7.2 Hz, 1 H), 7.81 (d, *J* = 8.6 Hz, 2 H), 7.74 (s, 1 H), 7.55–7.44 (m, 7 H), 7.37–7.31 (m, 4 H), 7.28–7.21 (m, 2 H), 4.53 (app. quint, *J* = 6.7 Hz, 1 H), 3.34 (dd, *J* = 13.6, 6.0 Hz, 1 H), 3.02 (dd, *J* = 13.6, 7.0 Hz, 1 H), 2.71–2.64 (m, 1 H), 2.58–2.51 (m, 1 H), 2.03–1.95 (m, 1 H), 1.89–1.81 (m, 1 H); <sup>13</sup>C NMR (125 MHz, CDCl<sub>3</sub>) δ 147.4, 146.9, 136.6, 133.7, 132.3, 128.31, 128.25, 128.2, 127.88, 127.87, 127.8, 127.6, 126.76, 126.74, 126.1, 126.0, 125.4, 88.5, 79.9, 42.8, 38.8, 31.0; IR (film) 2934, 1601, 1446 cm<sup>-1</sup>. MS (CI) 365.1899 (365.1900 calcd for C<sub>27</sub>H<sub>24</sub>O, M + H<sup>+</sup>). The enantiopurity was determined to be 95:5 er by chiral HPLC analysis (Chiralcel ADH, 25 cm x 4.6 mm, 2% IPA/Hexanes, 1.00 mL/min, λ 254 nm, RT= 5.2 and 6.3 min). When 2.0 equiv of H<sub>2</sub>O was added with toluene as solvent the enantiopurity was determined to be 96:4 er.

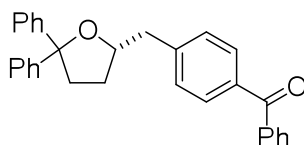

**(+)-(S)-{4-[(5,5-diphenyltetrahydrofuran-2-yl)methyl]phenyl}(phenyl)methanone**

**(2e).** The general procedure was employed for the coupling of 1,1-diphenylpent-4-en-1-ol (48 mg, 0.20 mmol) and 4-bromobenzophenone (94 mg, 0.36 mmol) using a catalyst composed of Pd<sub>2</sub>(dba)<sub>3</sub> (3.7 mg, 0.004 mmol) and **L7** (7.5 mg, 0.010 mmol), a reaction temperature of 90 °C and a reaction time of 12 h in 2mL of dioxane. This procedure afforded the title compound (52 mg, 62%) as a colorless oil.  $[\alpha]_D^{23} +18.9$  (c 2.40, CH<sub>2</sub>Cl<sub>2</sub>); <sup>1</sup>H NMR (500 MHz, CDCl<sub>3</sub>) δ 7.82–7.78 (m, 2 H), 7.75 (d, *J* = 8.1 Hz, 2 H),

7.59 (t,  $J = 7.2$  Hz, 1 H), 7.51–7.40 (m, 6 H), 7.38 (d,  $J = 8.1$  Hz, 2 H), 7.31–7.25 (m, 4 H), 7.22–7.17 (m, 2 H), 4.42 (app. quint,  $J = 6.6$  Hz, 1 H), 3.16 (dd,  $J = 13.6, 6.6$  Hz, 1 H), 2.91 (dd,  $J = 13.7, 6.4$  Hz, 1 H), 2.68–2.61 (m, 1 H), 2.54–2.47 (m, 1 H), 2.03–1.96 (m, 1 H), 1.81–1.73 (m, 1 H);  $^{13}\text{C}$  NMR (125 MHz,  $\text{CDCl}_3$ )  $\delta$  196.7, 147.2, 146.7, 144.2, 138.0, 135.7, 132.4, 130.4, 130.2, 129.5, 128.40, 128.35, 128.2, 126.83, 126.80, 126.0, 125.9, 88.6, 79.5, 42.7, 38.7, 31.2; IR (film) 2362, 1654, 1446  $\text{cm}^{-1}$ . MS (CI) 419.2006 (419.2006 calcd for  $\text{C}_{30}\text{H}_{26}\text{O}_2$ ,  $\text{M} + \text{H}^+$ ). The enantiopurity was determined to be 92:8 er by chiral HPLC analysis (Chiralcel ADH, 25 cm x 4.6 mm, 5% IPA/Hexanes, 1.00 mL/min,  $\lambda$  254 nm, RT= 9.8 and 11.7 min). When 2.0 equiv of  $\text{H}_2\text{O}$  was added with toluene as solvent the enantiopurity was determined to be 95:5 er (an unknown product co-eluted when water was used with this reaction see spectra for product **2e** below.)

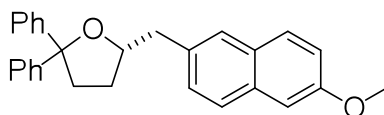

**(+)-(S)-5-[(6-methoxynaphthalen-2-yl)methyl]-2,2-diphenyltetrahydrofuran (2f).** The general procedure was employed for the coupling of 1,1-diphenylpent-4-en-1-ol (48 mg, 0.20 mmol) and 2-bromo-6-methoxynaphthalene (85 mg, 0.36 mmol) using a catalyst composed of  $\text{Pd}_2(\text{dba})_3$  (3.7 mg, 0.004 mmol) and **L7** (7.5 mg, 0.010 mmol), a reaction temperature of 90 °C and a reaction time of 12 h in 2mL of dioxane. This procedure afforded the title compound (52 mg, 66%) as a white solid, mp 93–96 °C.  $[\alpha]_{\text{D}}^{23} +29.8$  ( $c$  5.19,  $\text{CH}_2\text{Cl}_2$ );  $^1\text{H}$  NMR (500 MHz,  $\text{CDCl}_3$ )  $\delta$  7.69 (app. dd,  $J = 8.6, 3.2$  Hz, 2 H), 7.65 (s, 1 H), 7.53–7.46 (m, 4 H), 7.69 (d,  $J = 8.4$  Hz, 1 H), 7.36–7.28 (m, 4 H), 7.27–7.13 (m, 4 H), 4.50 (app. quint,  $J = 6.7$  Hz, 1 H), 3.94 (s, 3H), 3.29 (dd,  $J = 13.7, 5.9$  Hz, 1 H), 2.97

(dd,  $J = 13.7, 7.1$  Hz, 1 H), 2.69–2.61 (m, 1 H), 2.55–2.48 (m, 1 H), 2.00–1.93 (m, 1 H), 1.87–1.79 (m, 1 H);  $^{13}\text{C}$  NMR (125 MHz,  $\text{CDCl}_3$ )  $\delta$  157.4, 147.4, 146.9, 134.2, 133.3, 129.2, 128.6, 128.3, 128.2, 127.7, 126.74, 126.72, 126.1, 126.0, 118.8, 105.8, 88.5, 80.0, 55.4, 42.6, 38.8, 30.9; IR (film) 2937, 1605, 1448  $\text{cm}^{-1}$ . MS (CI) 395.2004 (395.2006 calcd for  $\text{C}_{28}\text{H}_{26}\text{O}_2$ ,  $\text{M} + \text{H}^+$ ). The enantiopurity was determined to be 95:5 er by chiral HPLC analysis (Chiralcel ADH, 25 cm x 4.6 mm, 2% IPA/Hexanes, 1.00 mL/min,  $\lambda$  254 nm, RT= 7.5 and 8.9 min).

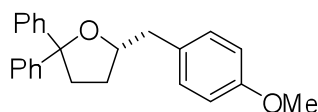

**(+)-(S)-5-(4-Methoxybenzyl)-2,2-diphenyltetrahydrofuran (2g).** The general procedure was employed for the coupling of 1,1-diphenylpent-4-en-1-ol (48 mg, 0.20 mmol) and 4-bromoanisole (46  $\mu\text{L}$ , 0.36 mmol) using a catalyst composed of  $\text{Pd}_2(\text{dba})_3$  (3.7 mg, 0.004 mmol) and **L7** (7.5 mg, 0.010 mmol), a reaction temperature of 90  $^\circ\text{C}$  and a reaction time of 12 h in 2 mL of dioxane. This procedure afforded the title compound (45.0 mg, 65%) as a colorless oil:  $[\alpha]_D^{23} +24.5$  (c 2.00,  $\text{CH}_2\text{Cl}_2$ );  $^1\text{H}$  NMR (700 MHz,  $\text{CDCl}_3$ )  $\delta$  7.47–7.42 (m, 4 H), 7.30–7.26 (m, 4 H), 7.21–7.15 (m, 4 H), 6.82 (d,  $J = 8.6$  Hz, 2 H), 4.33 (app. quint,  $J = 6.6$  Hz, 1 H), 3.79 (s, 3 H), 3.08 (dd,  $J = 13.6, 5.8$  Hz, 1 H), 2.74 (dd,  $J = 13.7, 7.2$  Hz, 1 H), 2.64–2.59 (m, 1 H), 2.50–2.45 (m, 1 H), 1.95–1.89 (m, 1 H), 1.76–1.70 (m, 1 H);  $^{13}\text{C}$  NMR (175 MHz,  $\text{CDCl}_3$ )  $\delta$  158.2, 147.4, 146.9, 131.1, 130.5, 128.3, 128.1, 126.73, 126.70, 126.1, 126.0, 113.9, 88.4, 80.2, 55.4, 41.8, 38.8, 30.9; IR (film) 2936, 1606, 1512  $\text{cm}^{-1}$ . MS (CI) 345.1847 (345.1855 calcd for  $\text{C}_{24}\text{H}_{24}\text{O}_2$ ,  $\text{M} + \text{H}^+$ ). The enantiopurity was determined to be 94:6 er by chiral HPLC

analysis (Chiralcel ADH, 25 cm x 4.6 mm, 2% IPA/Hexanes, 1.00 mL/min,  $\lambda$  254 nm, RT= 7.5 and 8.9 min).

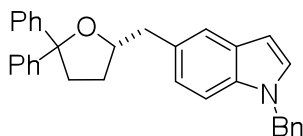

**(+)-(S)-1-Benzyl-5-[(5,5-diphenyltetrahydrofuran-2-yl)methyl]-1H-indole (2h).** The general procedure was employed for the coupling of 1,1-diphenylpent-4-en-1-ol (48 mg, 0.20 mmol) and 1-benzyl-5-bromo-1H-indole (103 mg, 0.36 mmol) using a catalyst composed of Pd<sub>2</sub>(dba)<sub>3</sub> (3.7 mg, 0.004 mmol) and **L7** (7.5 mg, 0.010 mmol), a reaction temperature of 90 °C and a reaction time of 12 h in 2mL of dioxane. This procedure afforded the title compound (63.5 mg, 72%) as a colorless oil:  $[\alpha]_D^{23} +14.7$  (c 6.00, CH<sub>2</sub>Cl<sub>2</sub>); <sup>1</sup>H NMR (700 MHz, CDCl<sub>3</sub>)  $\delta$  7.54–7.46 (m, 5 H), 7.33–7.25 (m, 7 H), 7.23–7.18 (m, 3 H), 7.15–7.08 (m, 4 H), 6.50 (d,  $J$  = 3.1 Hz, 1 H), 5.30 (s, 2 H), 4.44 (app. quint,  $J$  = 6.7 Hz, 1 H), 3.30 (dd,  $J$  = 13.5, 5.4, Hz 1 H), 2.88 (dd,  $J$  = 13.5, 7.9 Hz, 1 H), 2.65–2.60 (m, 1 H), 2.55–2.50 (m, 1 H), 1.95–1.89 (m, 1 H), 1.84–1.78 (m, 1 H); <sup>13</sup>C NMR (175 MHz, CDCl<sub>3</sub>)  $\delta$  147.5, 147.0, 137.8, 135.3, 130.0, 129.0, 128.9, 128.3, 128.1, 127.7, 127.0, 126.68, 126.66, 126.13, 126.08, 123.7, 121.4, 109.5, 101.5, 88.4, 80.9, 50.3, 42.8, 38.9, 30.9; IR (film) 2923, 1485, 1446 cm<sup>-1</sup>. MS (CI) 444.2319 (444.2322 calcd for C<sub>32</sub>H<sub>29</sub>NO, M + H<sup>+</sup>). The enantiopurity was determined to be 93:7 er by chiral HPLC analysis (Chiralcel ADH, 25 cm x 4.6 mm, 2% IPA/Hexanes, 1.00 mL/min,  $\lambda$  254 nm, RT= 10.8 and 21.3 min).

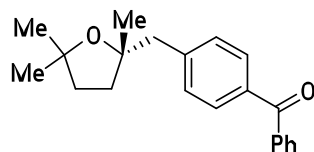

**(+)-(S)-Phenyl{4-[(2,5,5-trimethyltetrahydrofuran-2-yl)methyl]phenyl}methanone**

**(2j).** The general procedure was employed for the coupling of 2,5-dimethylhex-5-en-2-ol<sup>1</sup> (26 mg, 0.20 mmol) and 4-bromobenzophenone (94 mg, 0.36 mmol) using a catalyst composed of Pd<sub>2</sub>(dba)<sub>3</sub> (3.7 mg, 0.004 mmol) and **L7** (7.5 mg, 0.010 mmol), a reaction temperature of 90 °C and a reaction time of 12 h in 2mL of dioxane. This procedure afforded the title compound (51.0 mg, 77%) as a colorless oil: [α]<sub>D</sub><sup>23</sup> +3.48 (c 7.10, CH<sub>2</sub>Cl<sub>2</sub>); <sup>1</sup>H NMR (500 MHz, CDCl<sub>3</sub>) δ 7.76–7.82 (m, 2 H), 7.73 (d, *J* = 8.1 Hz, 2 H), 7.54–7.60 (m, 1 H), 7.47 (t, *J* = 10.0 Hz, 2 H), 7.35 (d, *J* = 8.1 Hz, 2 H), 2.85 (s, 2 H), 1.95–2.03 (m, 1 H), 1.76–1.85 (m, 2 H), 1.56–1.66 (m, 1 H), 1.25 (d, *J* = 2.9 Hz, 6 H), 1.14 (s, 3 H); <sup>13</sup>C NMR (175 MHz, CDCl<sub>3</sub>) δ 196.8, 143.9, 138.1, 135.6, 132.3, 130.8, 130.1, 129.9, 128.4, 83.3, 81.7, 48.5, 38.6, 36.7, 29.9, 29.4, 28.6; IR (film) 2966, 1654, 1277 cm<sup>-1</sup>; MS (ESI+) 309.1847 (309.1849 calcd for C<sub>21</sub>H<sub>24</sub>O<sub>2</sub>, M + H<sup>+</sup>). The enantiopurity was determined to be 38:62 er by chiral HPLC analysis (Chiralcel ADH, 25 cm x 4.6 mm, 2% IPA/Hexanes, 1.00 mL/min, λ 195 nm, RT= 10.1 and 10.8 min).

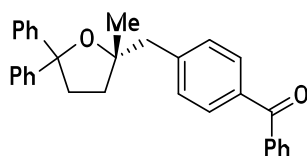

**(+)-(S)-{4-[(2-Methyl-5,5-diphenyltetrahydrofuran-2**

**yl)methyl]phenyl}(phenyl)methanone (2k).** The general procedure was employed for the coupling of 4-methyl-1,1-diphenylpent-4-en-1-ol (51 mg, 0.20 mmol) and 4-

bromobenzophenone (94 mg, 0.36 mmol) using a catalyst composed of Pd<sub>2</sub>(dba)<sub>3</sub> (3.7 mg, 0.004 mmol) and **L7** (7.5 mg, 0.010 mmol), a reaction temperature of 90 °C and a reaction time of 12 h in 2mL of dioxane. This procedure afforded the title compound (74.8 mg, 86%) as a colorless solid, mp 89–91 °C: [α]<sup>23</sup><sub>D</sub> +20.9 (c 6.30, CH<sub>2</sub>Cl<sub>2</sub>); <sup>1</sup>H NMR (500 MHz, CDCl<sub>3</sub>) δ 7.79–7.86 (m, 2 H), 7.72 (d, *J* = 8.1 Hz, 2 H), 7.58–7.64 (m, 1 H), 7.46–7.54 (m, 6 H), 7.26–7.40 (m, 6 H), 7.16–7.25 (m, 2 H), 3.03 (d, *J* = 13.2 Hz, 1 H), 2.91 (d, *J* = 13.2 Hz, 1 H), 2.62–2.75 (m, 2 H), 2.09 (m, 1 H), 1.86 (m 1 H), 1.31 (s, 3 H); <sup>13</sup>C NMR (175 MHz, CDCl<sub>3</sub>) δ 196.7, 148.2, 147.7, 143.8, 138.0, 135.6, 132.3, 130.6, 130.1, 129.9, 128.4, 128.1, 128.1, 126.7, 126.5, 126.0, 125.8, 88.7, 84.6, 48.5, 38.4, 37.4, 27.2; IR (film) 2966, 1654, 1277 cm<sup>-1</sup>; MS (ESI+) 433.2160 (433.2162 calcd for C<sub>31</sub>H<sub>28</sub>O<sub>2</sub>, M + H<sup>+</sup>). The enantiopurity was determined to be 95:5 er by chiral HPLC analysis (Chiralcel ADH, 25 cm x 4.6 mm, 2% IPA/Hexanes, 1.00 mL/min, λ 275 nm, RT= 15.4 and 18.1 min).

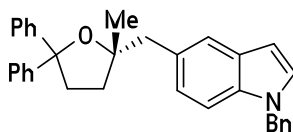

**(+)-(S)-1-Benzyl-5-[(2-methyl-5,5-diphenyltetrahydrofuran-2-yl)methyl]-1H-indole**

**(2I)**. The general procedure was employed for the coupling of 4-methyl-1,1-diphenylpent-4-en-1-ol (51 mg, 0.20 mmol) and 1-benzyl-5-bromo-1*H*-indole (103 mg, 0.36 mmol) using a catalyst composed of Pd<sub>2</sub>(dba)<sub>3</sub> (3.7 mg, 0.004 mmol) and **L7** (7.5 mg, 0.010 mmol), a reaction temperature of 90 °C and a reaction time of 12 h. This procedure afforded the title compound (80.5 mg, 88%) as a colorless solid, mp 127–128 °C : [α]<sup>23</sup><sub>D</sub> +22.6 (c 6.91, CH<sub>2</sub>Cl<sub>2</sub>); <sup>1</sup>H NMR (500 MHz, CDCl<sub>3</sub>) δ = 7.43–7.51 (m, 5 H),



7.22–7.33 (m, 10 H), 7.10–7.20 (m, 5 H), 7.08 (d,  $J = 3.2$  Hz, 1 H), 7.04 (dd,  $J = 8.4, 1.6$  Hz, 1 H), 6.46 (d,  $J = 3.2$  Hz, 1 H), 5.29 (s, 2 H), 3.04 (d,  $J = 13.4$  Hz, 1 H), 2.90 (d,  $J = 13.4$  Hz, 1 H), 2.62–2.66 (m, 2 H), 2.06–2.13 (m, 1 H), 1.67–1.75 (m, 1 H), 1.26 (s, 3 H);  $^{13}\text{C}$  NMR (125 MHz,  $\text{CDCl}_3$ )  $\delta$  148.5, 148.1, 137.8, 135.3, 129.8, 128.9, 128.7, 128.3, 128.1, 128.0, 127.7, 127.0, 126.5, 126.4, 126.2, 126.0, 124.8, 122.5, 109.1, 101.5, 88.4, 85.4, 50.2, 48.5, 38.8, 36.9, 27.1; IR (film) 2924, 1485, 1447  $\text{cm}^{-1}$ ; MS (ESI+) 458.2478 (458.2478 calcd for  $\text{C}_{33}\text{H}_{31}\text{NO}$ ,  $\text{M} + \text{H}^+$ ). The enantiopurity was determined to be 96:4 er by chiral HPLC analysis (Chiralcel ADH, 25 cm x 4.6 mm, 1% IPA/Hexanes, 1.00 mL/min,  $\lambda$  254 nm, RT= 11.6 and 30.3 min).

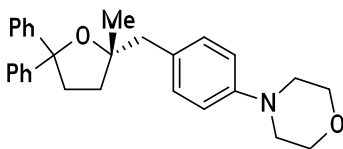

**(+)-(S)-4-{4-[(2-Methyl-5,5-diphenyltetrahydrofuran-2-yl)methyl]phenyl}morpholine (2m).** The general procedure was employed for the coupling of 4-methyl-1,1-diphenylpent-4-en-1-ol (51 mg, 0.20 mmol) and 4-(4-bromophenyl)morpholine (87 mg, 0.36 mmol) using a catalyst composed of  $\text{Pd}_2(\text{dba})_3$  (3.7 mg, 0.004 mmol) and **L7** (7.5 mg, 0.010 mmol), a reaction temperature of 90 °C and a reaction time of 12 h in 2 mL of dioxane. This procedure afforded the title compound (68.0 mg, 82%) as a colorless solid, mp 143–145 °C :  $[\alpha]_D^{23} +28.8$  (c 6.70,  $\text{CH}_2\text{Cl}_2$ );  $^1\text{H}$  NMR (500 MHz,  $\text{CDCl}_3$ )  $\delta$  7.47 (dd,  $J = 12.8, 7.5$  Hz, 4 H), 7.22–7.33 (m, 4 H), 7.13–7.19 (m, 2 H), 7.12 (d,  $J = 8.3$  Hz, 2 H), 6.79 (d,  $J = 8.3$  Hz, 2 H), 3.87 (t,  $J = 4.7$  Hz, 4 H), 3.09–3.14 (m, 4 H), 2.88 (d,  $J = 13.5$  Hz, 1 H), 2.74 (d,  $J = 13.5$  Hz, 1 H), 2.59–2.68 (m, 2 H), 1.98–2.03 (m, 1 H), 1.69–1.74 (m, 1 H), 1.23 (s, 3 H);  $^{13}\text{C}$  NMR (125 MHz,  $\text{CDCl}_3$ )  $\delta$  149.7, 148.4, 148.0, 131.3,

130.3, 128.1, 128.0, 126.5, 126.5, 126.1, 125.9, 115.4, 88.4, 85.1, 67.1, 49.7, 47.6, 38.7, 37.0, 27.0; IR (film) 2966, 1515, 1446  $\text{cm}^{-1}$ ; MS (ESI+) 414.2427 (414.2428 calcd for  $\text{C}_{28}\text{H}_{31}\text{NO}_2$ ,  $\text{M} + \text{H}^+$ ). The enantiopurity was determined to be 93:7 er by chiral HPLC analysis (Chiralcel ADH, 25 cm x 4.6 mm, 2% IPA/Hexanes, 1.00 mL/min,  $\lambda$  210 nm, RT= 8.7 and 10.7 min).

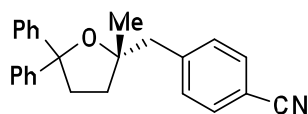

**(+)-(S)-4-[(2-Methyl-5,5-diphenyltetrahydrofuran-2-yl)methyl]benzonitrile (2n).** The general procedure was employed for the coupling of 4-methyl-1,1-diphenylpent-4-en-1-ol (51 mg, 0.20 mmol) and 4-bromobenzonitrile (66 mg, 0.36 mmol) using a catalyst composed of  $\text{Pd}_2(\text{dba})_3$  (3.7 mg, 0.004 mmol) and **L7** (7.5 mg, 0.010 mmol), a reaction temperature of 90 °C and a reaction time of 12 h in 2mL of dioxane. This procedure afforded the title compound (27.0 mg, 38%) as a colorless solid, mp 100–104 °C:  $[\alpha]_{\text{D}}^{23} +23.9$  (c 2.00,  $\text{CH}_2\text{Cl}_2$ );  $^1\text{H}$  NMR (500 MHz,  $\text{CDCl}_3$ )  $\delta$  7.47 (d,  $J = 8.1$  Hz, 2 H), 7.38–7.42 (m, 4 H), 7.27–7.30 (m, 4 H), 7.22–7.25 (m, 2 H), 7.13–7.22 (m, 2 H), 2.90–2.95 (d,  $J = 13.5$  Hz, 1 H), 2.79–2.85 (d,  $J = 13.5$  Hz, 1 H), 2.55–2.67 (m, 2 H), 1.96–2.02 (m, 1 H), 1.79–1.86 (m, 1 H), 1.23 (s, 3 H);  $^{13}\text{C}$  NMR (125 MHz,  $\text{CDCl}_3$ )  $\delta$  148.1, 147.4, 144.2, 131.7, 131.4, 128.2, 128.2, 126.8, 126.6, 126.0, 125.7, 119.4, 110.1, 88.8, 84.3, 48.5, 38.2, 37.5, 27.3; IR (film) 2925, 2223, 1607  $\text{cm}^{-1}$ ; MS (ESI+) 376.1670 (376.1670 calcd for  $\text{C}_{25}\text{H}_{23}\text{NO}$ ,  $\text{M} + \text{Na}^+$ ). The enantiopurity was determined to be 87:13 er by chiral HPLC analysis (Chiralcel ADH, 25 cm x 4.6 mm, 2% IPA/Hexanes, 1.00 mL/min,  $\lambda$  195 nm, RT= 7.5 and 8.4 min).

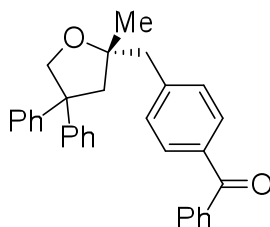

**(+)-(R)-{4-[(2-Methyl-4,4-diphenyltetrahydrofuran-2-**

**yl)methyl]phenyl}(phenyl)methanone (6).** The general procedure was employed for the coupling of 4-methyl-2,2-diphenylpent-4-en-1-ol<sup>[3]</sup> (51 mg, 0.20 mmol) and (4-bromophenyl)(phenyl)methanone (94 mg, 0.36 mmol) using a catalyst composed of Pd<sub>2</sub>(dba)<sub>3</sub> (3.7 mg, 0.004 mmol) and **L7** (7.5 mg, 0.010 mmol), a reaction temperature of 90 °C, and a reaction time of 12 h in 2mL of dioxane. This procedure afforded the title compound (73 mg, 84%) as a light yellow oil. [ $\alpha$ ]<sub>D</sub><sup>23</sup> = +0.01 (c 5.9, CH<sub>2</sub>Cl<sub>2</sub>); <sup>1</sup>H NMR (500 MHz, CDCl<sub>3</sub>)  $\delta$  7.57–7.62 (m, 1 H), 7.46–7.52 (m, 2 H), 7.26–7.36 (m, 11 H), 7.16–7.22 (m, 2 H), 4.53 (d, *J* = 9.5 Hz, 1 H), 4.39 (d, *J* = 9.5 Hz, 1 H), 2.90 (d, *J* = 13.2 Hz, 1 H), 2.81 (d, *J* = 12.7 Hz, 1 H), 2.73 (d, *J* = 13.2 Hz, 1 H), 2.61 (d, *J* = 12.7 Hz, 1 H), 1.12 (s, 3 H); <sup>13</sup>C NMR (125 MHz, CDCl<sub>3</sub>)  $\delta$  196.7, 146.5, 143.4, 138.0, 135.7, 132.4, 130.6, 130.1, 130.0, 128.6, 128.5, 128.4, 127.3, 126.4, 126.4, 83.7, 75.5, 56.5, 50.3, 47.8, 26.9; IR (film) 2926.7, 2247, 1654, 1276 cm<sup>-1</sup>; MS (ESI+) 433.2164 (433.2162 calcd for C<sub>31</sub>H<sub>28</sub>O<sub>2</sub>, M + H<sup>+</sup>). The enantiopurity was determined to be 51:49 er by chiral HPLC analysis (Chiralcel ADH, 25 cm x 4.6 mm, 5% IPA/Hexanes, 1.00 mL/min,  $\lambda$  254 nm, RT= 15.6 and 21.3 min).

### Determination of absolute configuration:

Product **2i** was synthesized according to general procedure D. The optical rotation of this compound ( $[\alpha]_{\text{D}}^{23} +4.54$  ( $c$  0.22,  $\text{CHCl}_3$ )); was compared with that in the literature<sup>[9]</sup> ( $\text{lit}[\alpha]_{\text{D}}^{23} +8.30$  ( $c$  0.6,  $\text{CHCl}_3$ )). Both compounds were dextrorotatory, thus **2i** was assigned the (*S*) configuration on this basis.

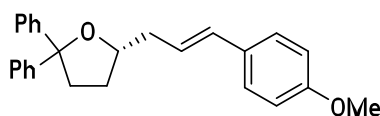

**(+)-(S,E)-5-[3-(4-Methoxyphenyl)allyl]-2,2-diphenyltetrahydrofuran (2i):** The general procedure was employed for the coupling of 1,1-diphenylpent-4-en-1-ol (48 mg, 0.20 mmol) and (*E*)-1-(2-bromovinyl)-4-methoxybenzene (85 mg, 0.40 mmol) using a catalyst composed of 2 mol %  $\text{Pd}_2(\text{dba})_3$  (3.6 mg, 0.004 mmol) and **L7** (7.5 mg, 0.010 mmol), a reaction temperature of 90 °C and a reaction time of 12 h. This procedure afforded the title compound (14 mg, 18 %) as a colorless oil.  $[\alpha]_{\text{D}}^{23} +4.54$  ( $c$  0.22,  $\text{CHCl}_3$ );  $\text{lit}^{[9]}[\alpha]_{\text{D}}^{23} +8.30$  ( $c$  0.6,  $\text{CHCl}_3$ );  $^1\text{H NMR}$  (400 MHz,  $\text{CDCl}_3$ )  $\delta$  7.46 (d,  $J = 7.5$  Hz, 4 H), 7.33–7.23 (m, 6 H), 7.22–7.15 (m, 2 H), 6.83 (d,  $J = 8.8$  Hz, 2 H), 6.40 (d,  $J = 16.0$  Hz, 1 H), 6.83 (dt,  $J = 15.7, 7.0$  Hz, 1 H), 4.31–4.21 (m, 1 H), 3.80 (s, 3 H), 2.70–2.58 (m, 2 H), 2.57–2.40 (m, 2 H), 2.06–1.86 (m, 1 H), 1.81–1.70 (m, 1 H). Other spectroscopic data matched that of the literature.<sup>[9]</sup> The enantiopurity was determined to be 79:21 er by chiral HPLC analysis (Chiralcel ADH, 25 cm x 4.6 mm, 0.5% IPA/Hexanes, 1.00 mL/min,  $\lambda$  254 nm, RT= 17.5 and 18.8 min).

## Screen of Chiral TADDOL-Derived Phosphite Ligands:

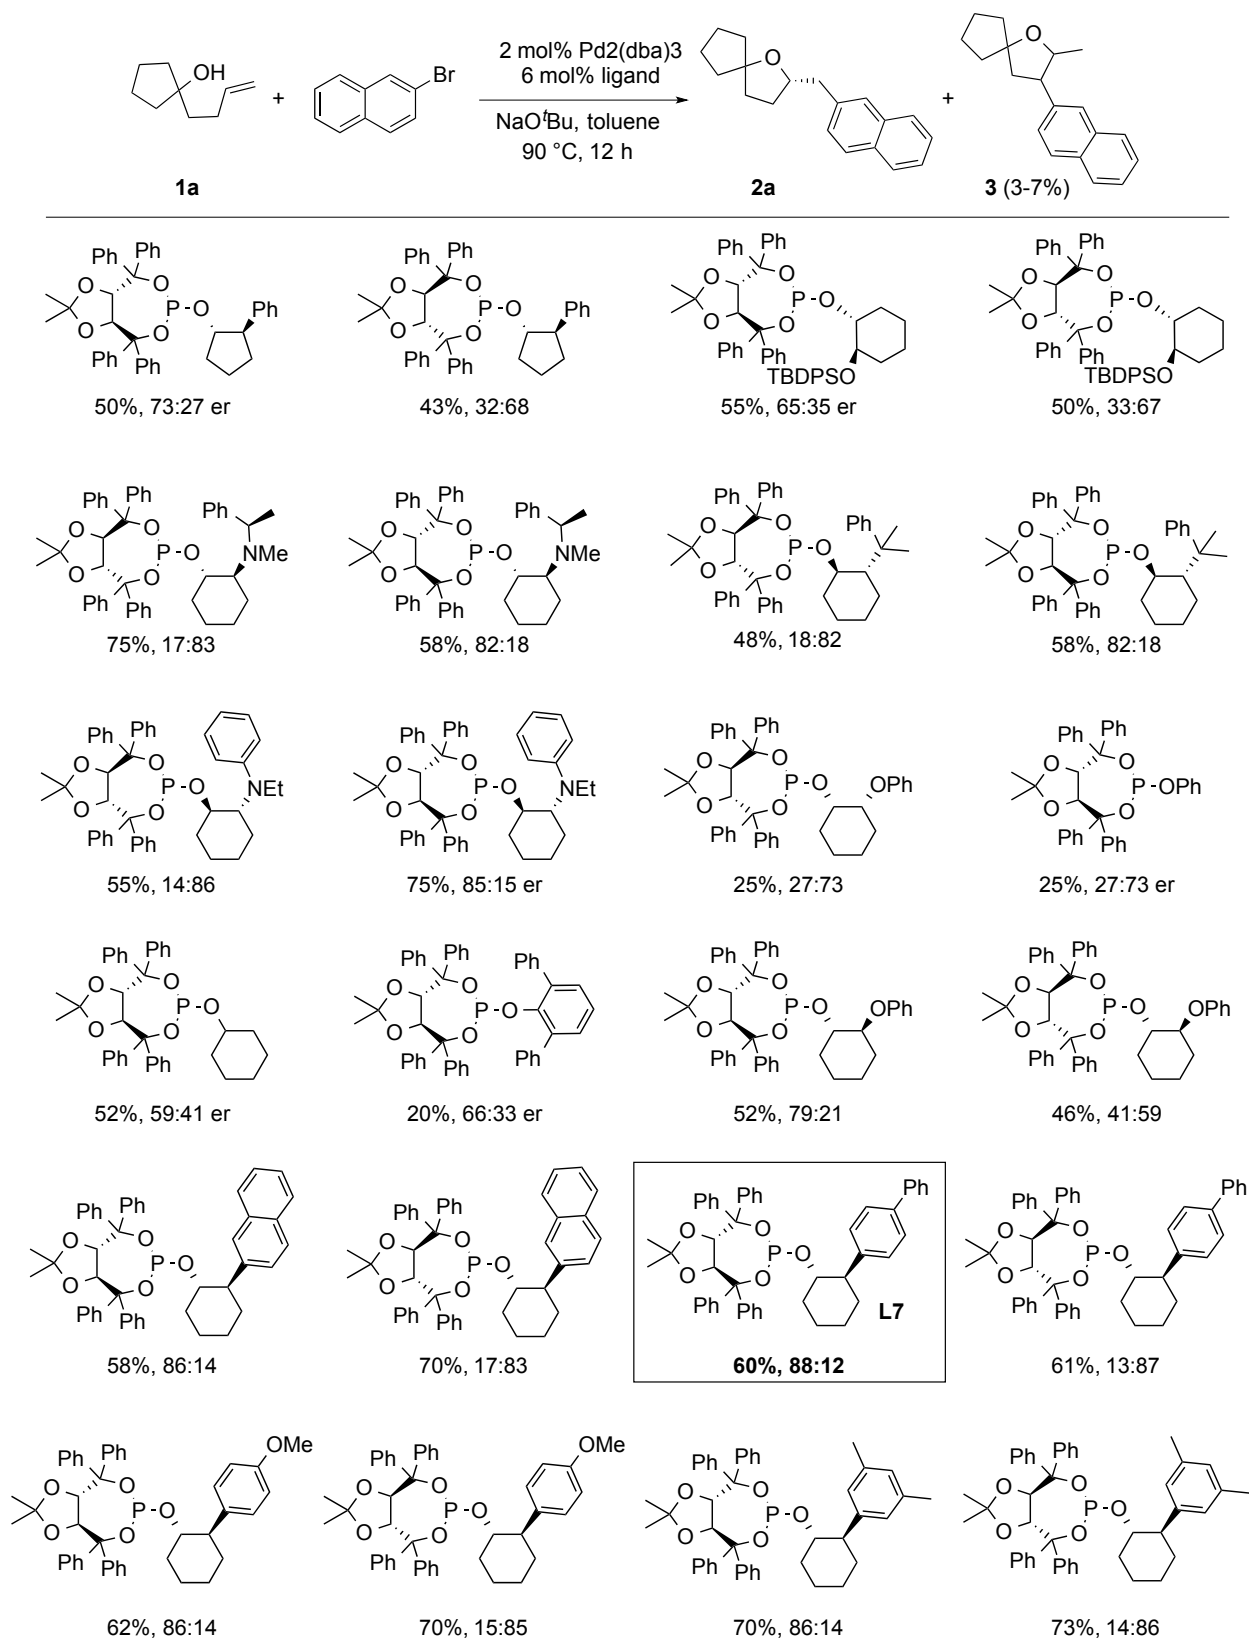

## References

- [1] M. B. Hay, A. R. Hardin, J. P. Wolfe, *J. Org. Chem.* **2005**, *70*, 3099.
- [2] B. E. Carpenter, I. R. Hunt, B. A. Keay, *Tetrahedron: Asymmetry* **1996**, *7*, 3107.
- [3] Y. Jeong, D. -Y. Kim, Y. Choi, J. -S. Ryu, *Org. Biomol. Chem.* **2011**, *9*, 374.
- [4] A. Alexakis, J. Burton, J. Vastra, C. Benhaim, X. Fournioux, A. van den Heuvel, J.-M. Levêque, F. Mazé, S. Rosset, *Eur. J. Org. Chem.* **2000**, 4011.
- [5] M. Hatano, O. Ito, S. Suzuki, K. Ishihara, *J. Org. Chem.* **2010**, *75*, 5008.
- [6] Z. Cai, N. Yongpruksa, M. Harmata, *Org. Lett.* **2012**, *14*, 1661.
- [7] M. B. Hay, J. P. Wolfe, *J. Am. Chem. Soc.* **2005**, *127*, 16468.
- [8] A. Faulkner, J. S. Scott, J. F. Bower, *Chem. Comm.* **2013**, *49*, 1521.
- [9] M. T. Bovino, T. W. Liwosz, N. E. Kendel, Y. Miller, N. Tyminska, E. Zurek, S. R. Chemler, *Angew. Chem.* **2014**, *126*, 6501; *Angew. Chem. Int. Ed.* **2014**, *53*, 6383.

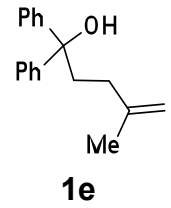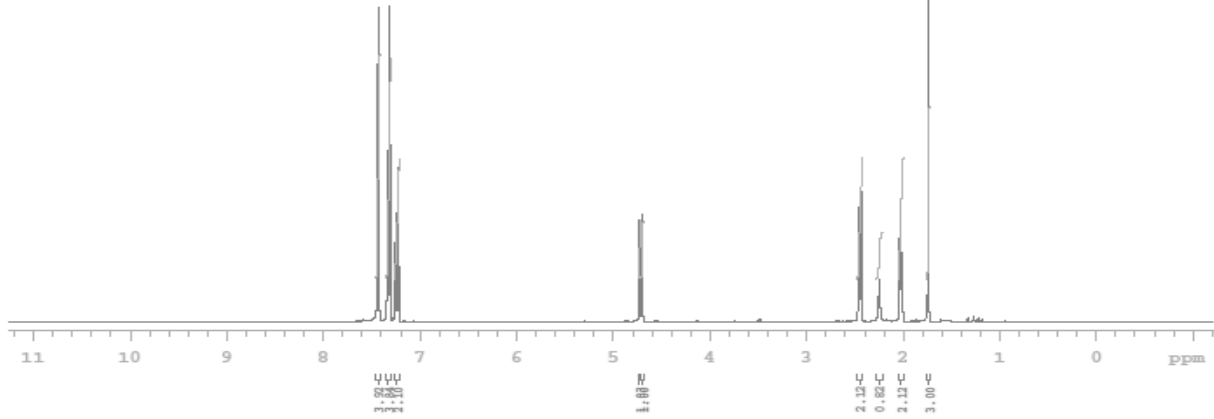

Data file: /misc/Teikurum/garietcz/vmmr/sys/data/zgg\_jpw.2.204.5.H1.fid

Plot date: 2015-05-14

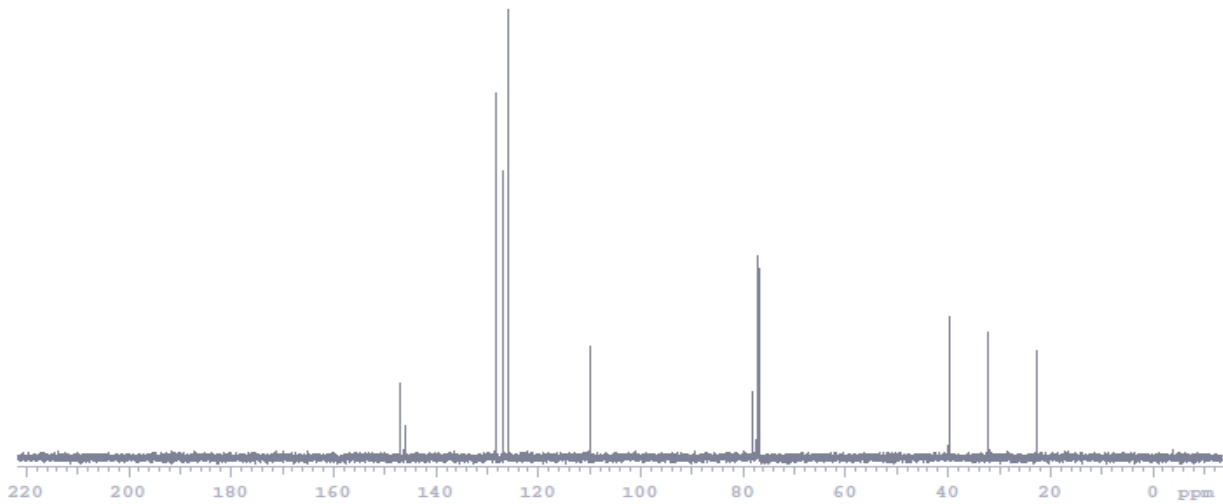

Data file: /misc/Teikurum/garietcz/vmmr/sys/data/zgg\_jpw.2.204.3.C13.fid

Plot date: 2015-05-14

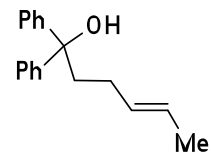

1f

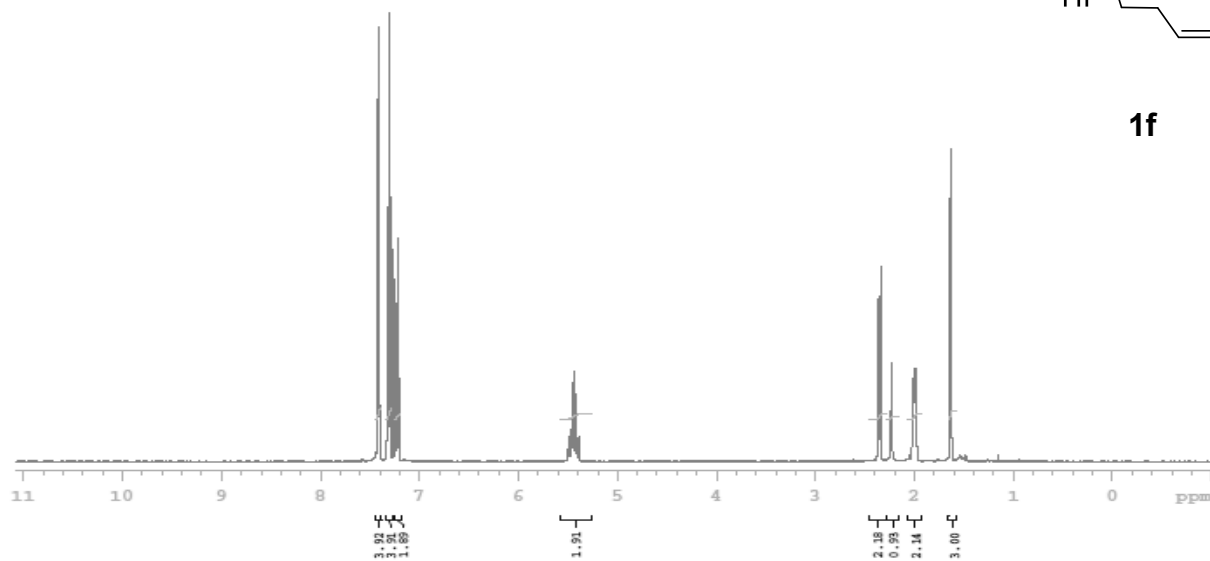

Data file: /home/garietcz/vnmr5/sys/data/zjg.jpw.2.190.3.H1.fid

Plot date: 2015-05-14

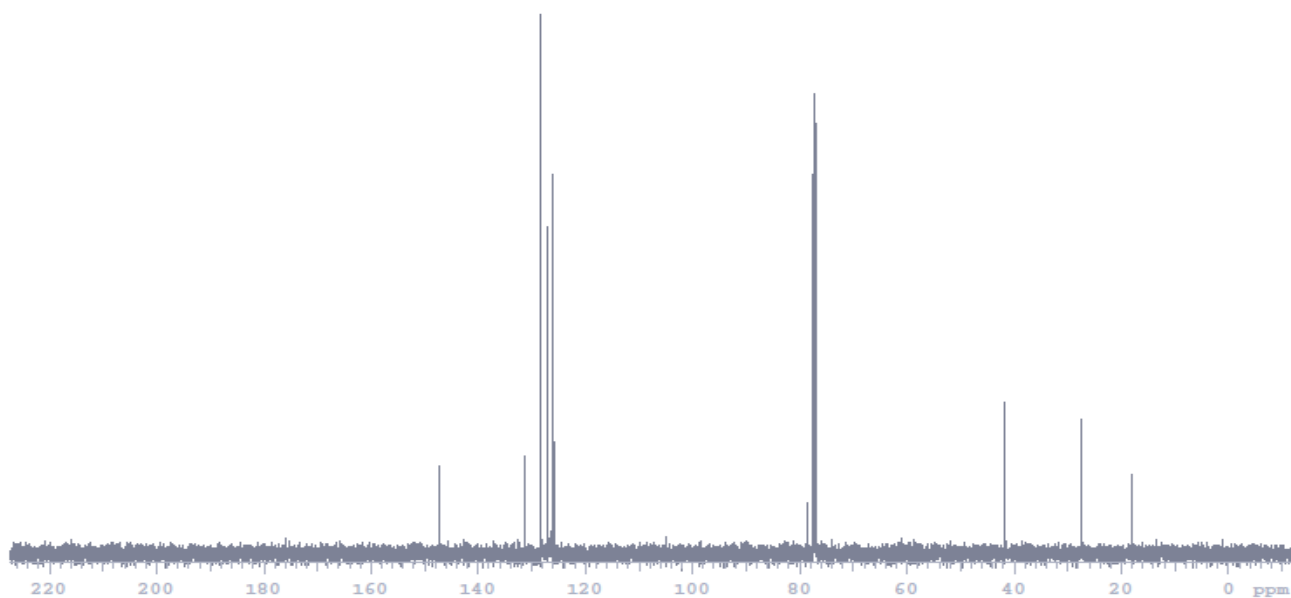

Data file: /home/garietcz/vnmr5/sys/data/zjg.jpw.2.190.4.C13.fid

Plot date: 2015-05-14



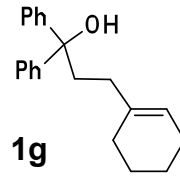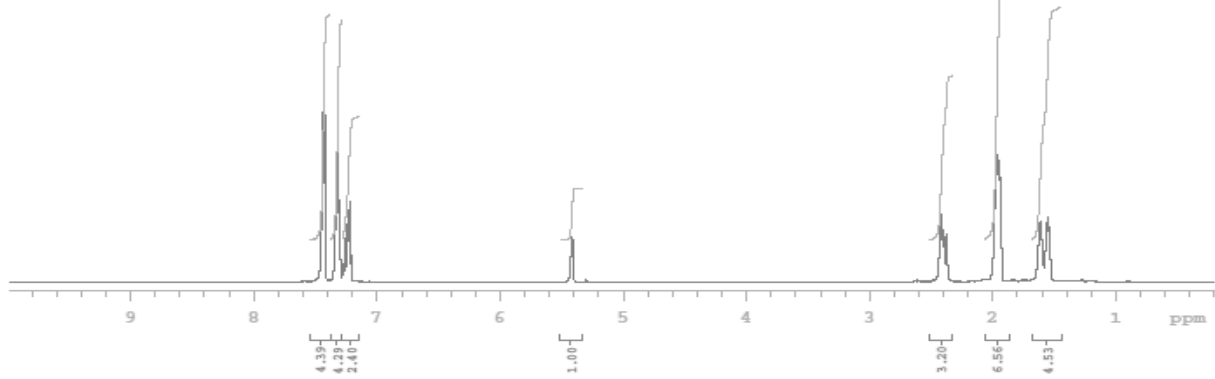

Data file: /misc/Telurum/garietcz/vnmr5ys/data/zjg.jpw.2.199.5.H1.fid

Plot date: 2015-05-14

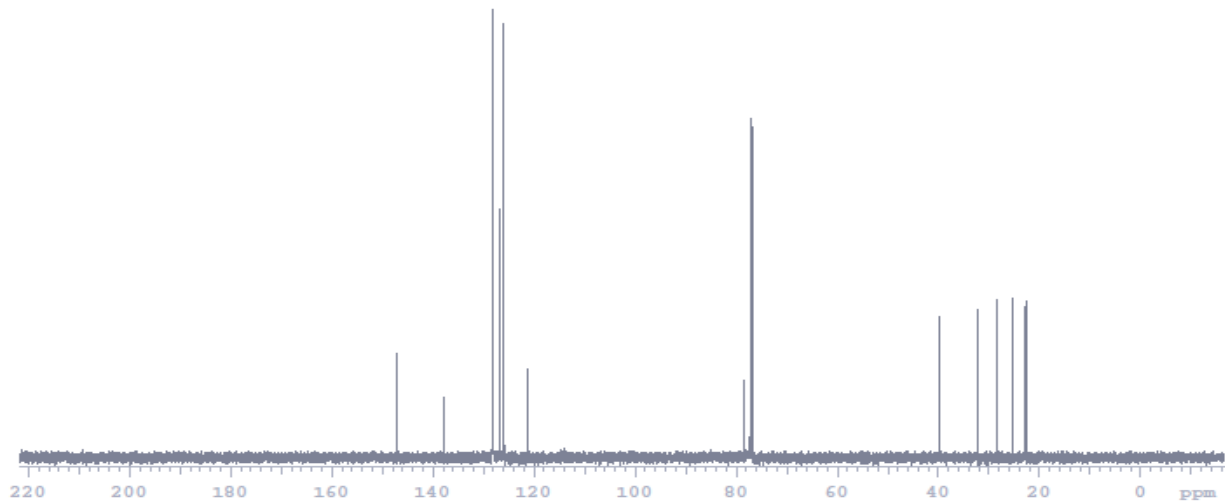

Data file: /misc/Ytterblum/garietcz/vnmr5ys/data/zjg.jpw.2.199.3.C13.fid

Plot date: 2015-05-14

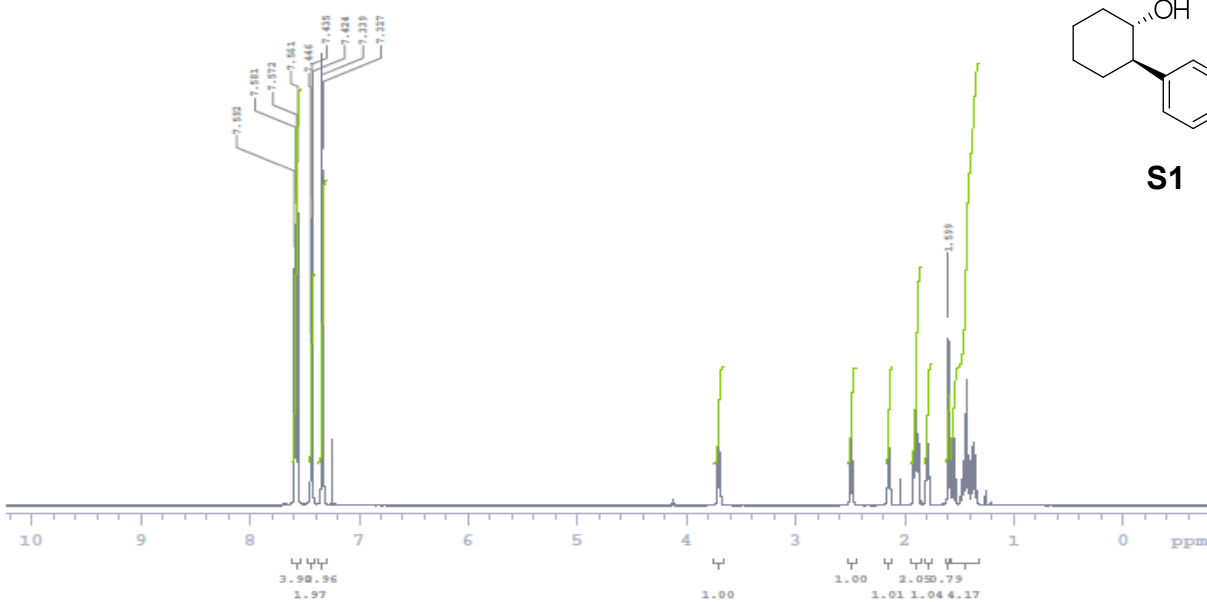

Data file: /misc/Yterblum/bahopki/vnmrsys/data/BAH-7-177proton.fid

Plot date: 2015-03-16

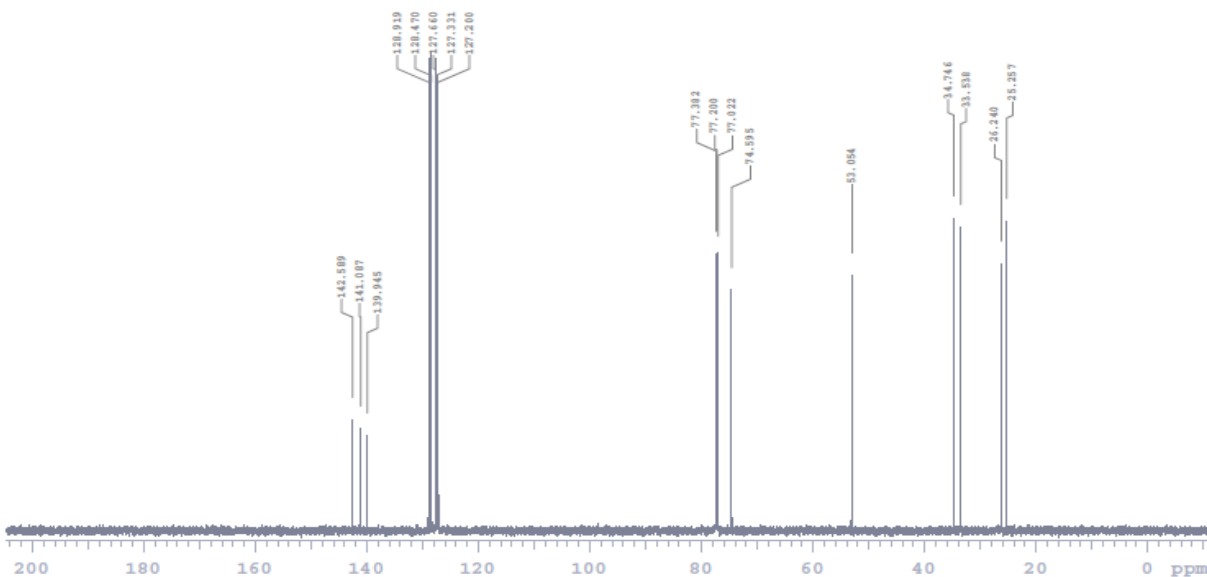

Data file: /misc/Yterblum/bahopki/vnmrsys/data/BAH-7-177carbon.fid

Plot date: 2015-03-16

## ==== Shimadzu LCsolution Analysis Report ====

C:\LabSolutions\Data\B. Hopkins\2-arylcyclohexanols\RACcyclohexanol-BAH-7-176-1.00mL\_min-4.00%IPA-OJH.lcd  
 Acquired by : Admin  
 Sample Name : RACcyclohexanol-BAH-7-176-1.00mL\_min-4.00%IPA-OJH  
 Sample ID :  
 Tray# : 1  
 Vial # : 1  
 Injection Volume : 1 uL  
 Data File Name : RACcyclohexanol-BAH-7-176-1.00mL\_min-4.00%IPA-OJH.lcd  
 Method File Name : Cyclic Urea Method.lcm  
 Batch File Name :  
 Report File Name : Default.lcr  
 Data Acquired : 6/17/2014 3:49:42 PM  
 Data Processed : 6/17/2014 4:54:01 PM

### <Chromatogram>

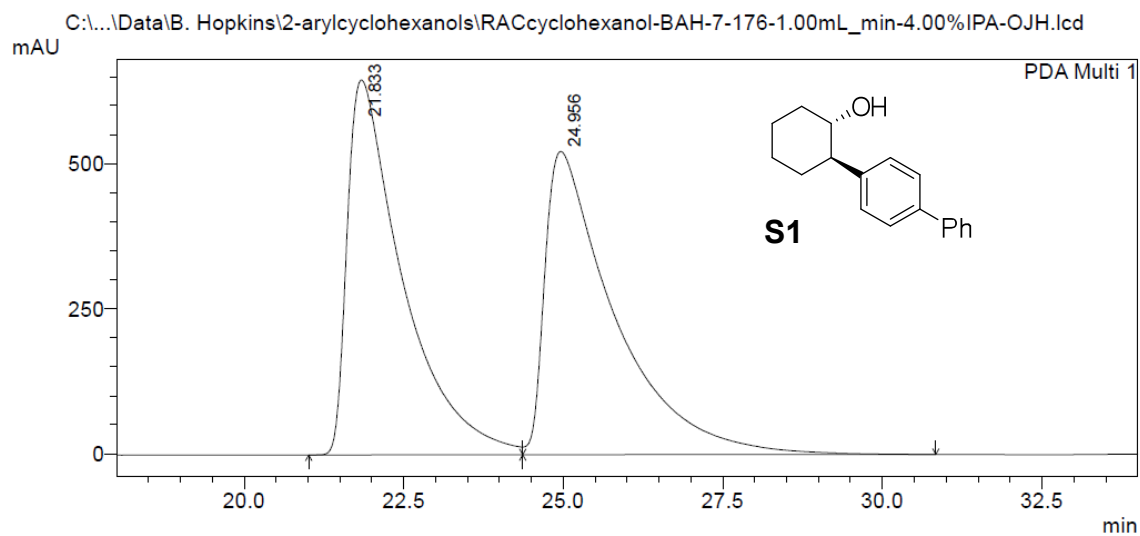

1 PDA Multi 1/254nm 4nm

PeakTable

PDA Ch1 254nm 4nm

| Peak# | Ret. Time | Area     | Height  | Area %  | Height % |
|-------|-----------|----------|---------|---------|----------|
| 1     | 21.833    | 38905320 | 645897  | 49.439  | 55.274   |
| 2     | 24.956    | 39788133 | 522646  | 50.561  | 44.726   |
| Total |           | 78693453 | 1168542 | 100.000 | 100.000  |

## ==== Shimadzu LCsolution Analysis Report ====

C:\...\Data\B. Hopkins\2-aryl\cyclohexanols\CHIRAL-cyclohexanol-BAH-9-62-1.00mL\_min-4.00%IPA-OJH-3days.lcd  
 Acquired by : Admin  
 Sample Name : CHIRAL-cyclohexanol-BAH-9-62-1.00mL\_min-4.00%IPA-OJH-3days  
 Sample ID :  
 Tray# : 1  
 Vial # : 1  
 Injection Volume : 1 uL  
 Data File Name : CHIRAL-cyclohexanol-BAH-9-62-1.00mL\_min-4.00%IPA-OJH-3days.lcd  
 Method File Name : Cyclic Urea Method.lcm  
 Batch File Name :  
 Report File Name : Default.lcr  
 Data Acquired : 2/9/2015 10:31:38 AM  
 Data Processed : 2/9/2015 11:41:41 AM

### <Chromatogram>

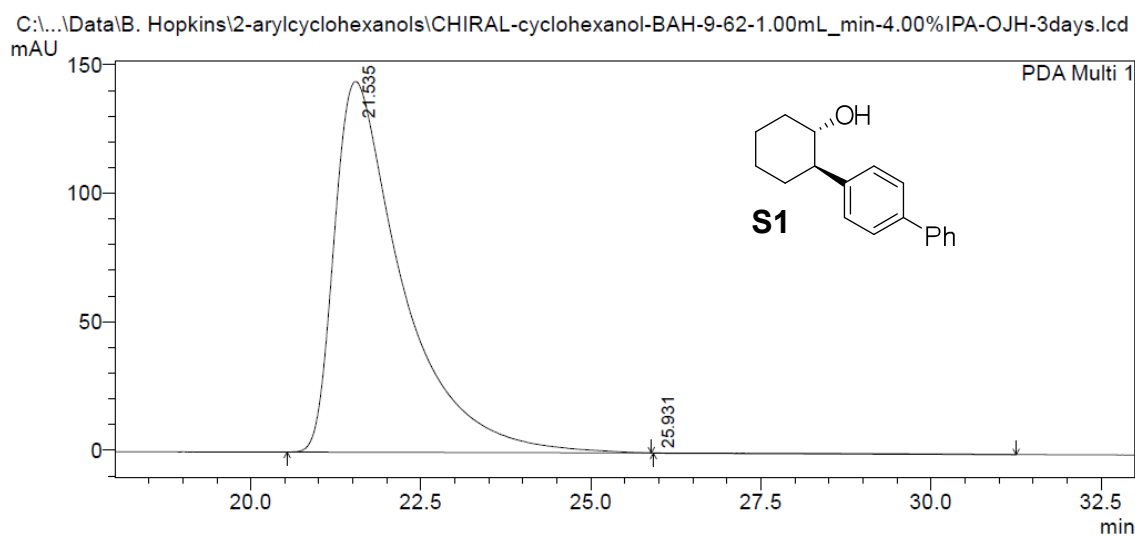

1 PDA Multi 1/254nm 4nm

PeakTable

PDA Ch1 254nm 4nm

| Peak# | Ret. Time | Area     | Height | Area %  | Height % |
|-------|-----------|----------|--------|---------|----------|
| 1     | 21.535    | 10056711 | 144136 | 99.784  | 99.956   |
| 2     | 25.931    | 21749    | 63     | 0.216   | 0.044    |
| Total |           | 10078460 | 144200 | 100.000 | 100.000  |

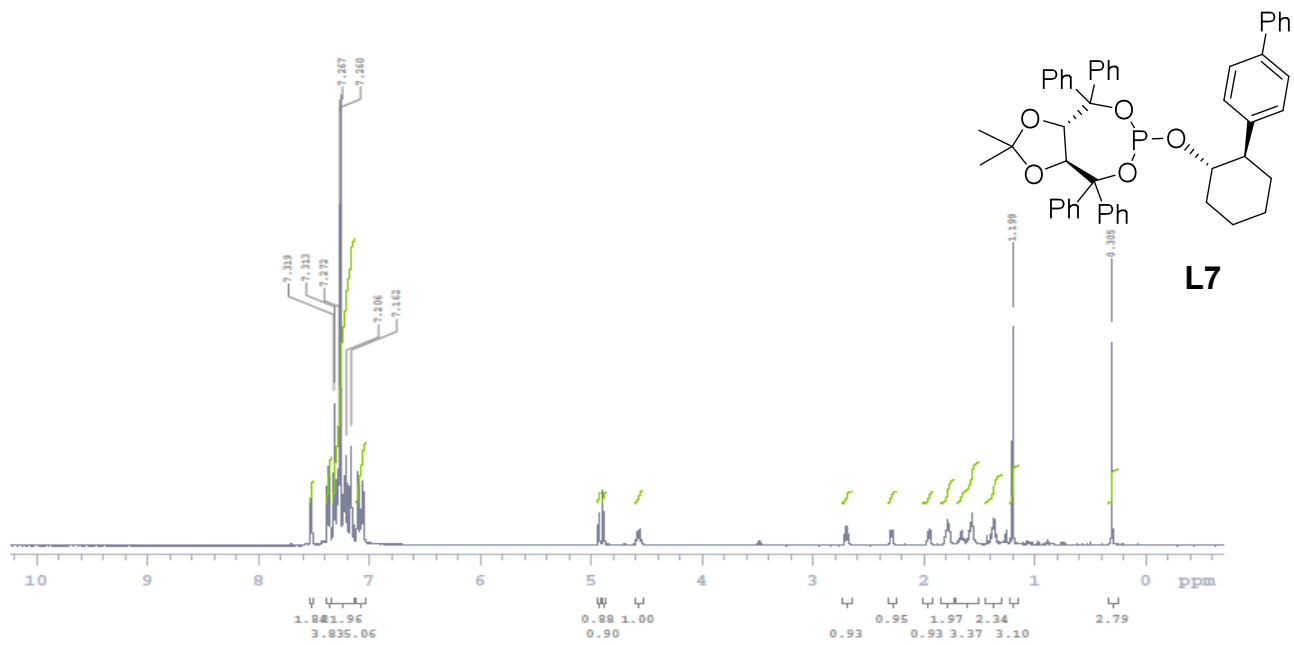

Data file: /misc/Y/terbium/bahopki/vnmrsys/data/BAH-8-21proton.fid

Plot date: 2015-03-16

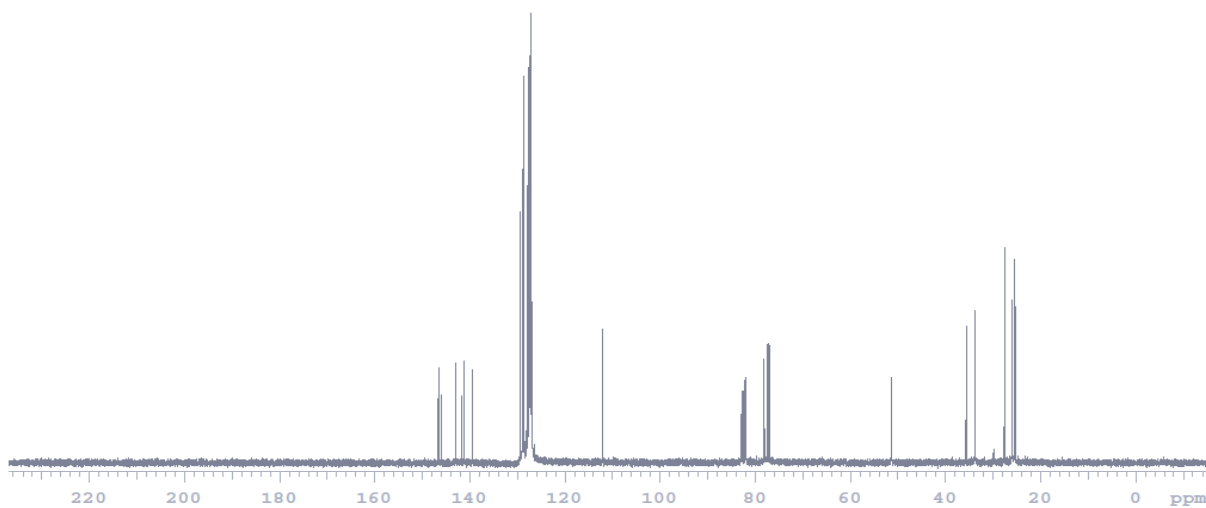

Data file: /misc/Y/terbium/bahopki/vnmrsys/data/BAH-8-21carbon.fid

Plot date: 2015-05-04

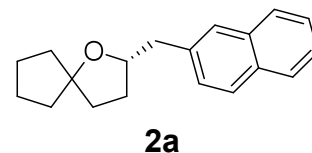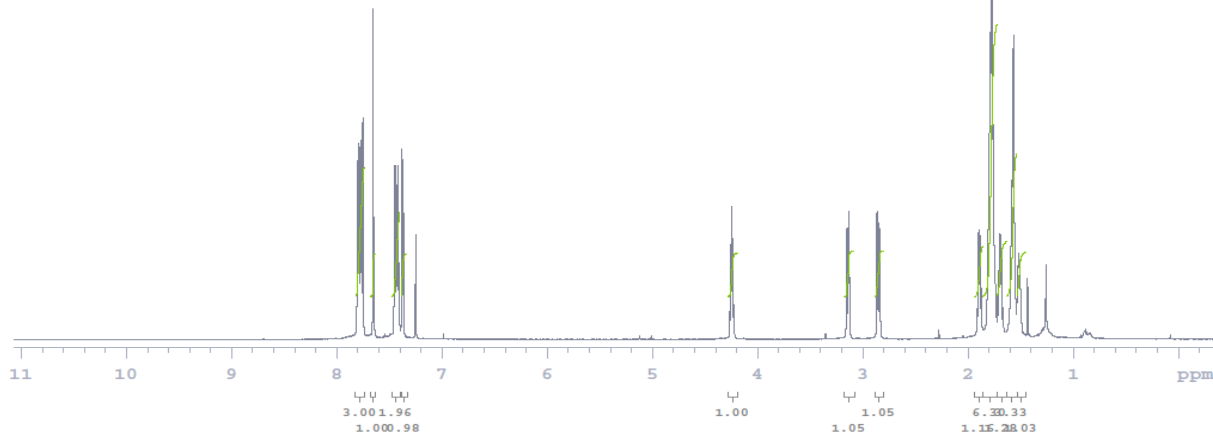

Data file: /misc/Ytterbium/bahopki/vnmrsys/data/BAH-9-119proton.fid

Plot date: 2015-05-04

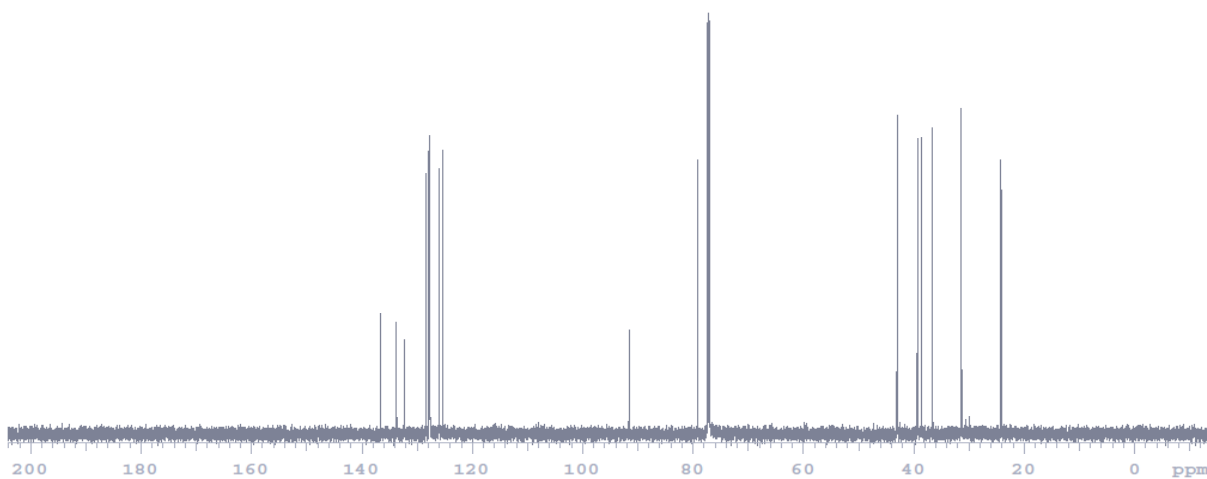

Data file: /misc/Ytterbium/bahopki/vnmrsys/data/BAH-9-119carbon.fid

Plot date: 2015-05-04

## ==== Shimadzu LCsolution Analysis Report ====

C:\LabSolutions\Data\B. Hopkins\Sprio-RAC-BAH-8-92(1)-1.00%IPA-1.00mL\_min-OJH1.lcd  
 Acquired by : Admin  
 Sample Name : Sprio-RAC-BAH-8-92(1)-1.00%IPA-1.00mL\_min-OJH  
 Sample ID :  
 Tray# : 1  
 Vial # : 1  
 Injection Volume : 1 uL  
 Data File Name : Sprio-RAC-BAH-8-92(1)-1.00%IPA-1.00mL\_min-OJH1.lcd  
 Method File Name : Cyclic Urea Method.lcm  
 Batch File Name :  
 Report File Name : Default.lcr  
 Data Acquired : 10/16/2014 11:44:43 AM  
 Data Processed : 10/16/2014 12:54:46 PM

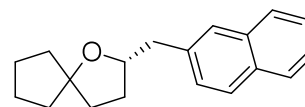**2a**

### <Chromatogram>

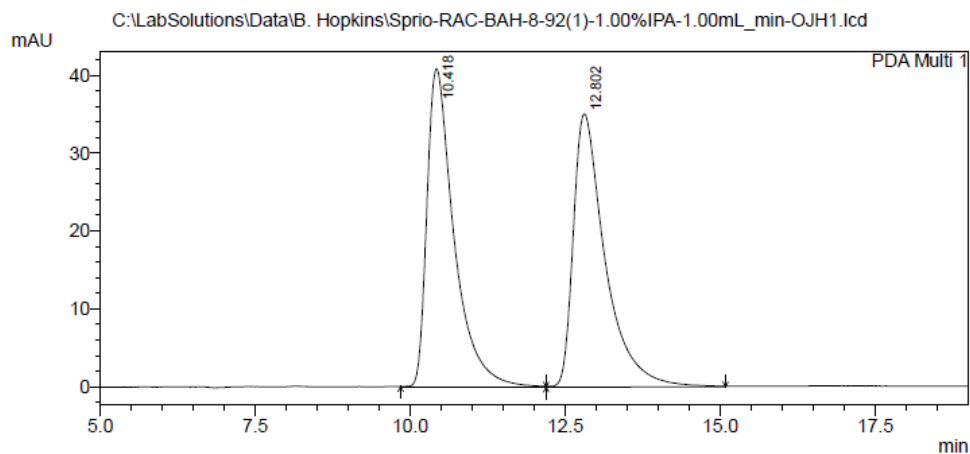

PeakTable

| Peak# | Ret. Time | Area    | Height | Area %  | Height % |
|-------|-----------|---------|--------|---------|----------|
| 1     | 10.418    | 1241027 | 40824  | 49.700  | 53.782   |
| 2     | 12.802    | 1256030 | 35082  | 50.300  | 46.218   |
| Total |           | 2497057 | 75905  | 100.000 | 100.000  |

C:\LabSolutions\Data\B. Hopkins\Sprio-RAC-BAH-8-92(1)-1.00%IPA-1.00mL\_min-OJH1.lcd

## ==== Shimadzu LcSolution Analysis Report ====

C:\...\Data\B. Hopkins\cyclopentylfused (3018-15 and on)\CHIRAL-BAH-9-147(2)-1.00%IPA-1.00mL\_min-OJH.lcd  
 Acquired by : Admin  
 Sample Name : CHIRAL-BAH-9-147(2)-1.00%IPA-1.00mL\_min-OJH  
 Sample ID :  
 Tray# : 1  
 Vial # : 1  
 Injection Volume : 1 uL  
 Data File Name : CHIRAL-BAH-9-147(2)-1.00%IPA-1.00mL\_min-OJH.lcd  
 Method File Name : Cyclic Urea Method.lcm  
 Batch File Name :  
 Report File Name : Default.lcr  
 Data Acquired : 4/10/2015 10:45:11 PM  
 Data Processed : 4/10/2015 11:20:21 PM

### <Chromatogram>

C:\...\Data\B. Hopkins\cyclopentylfused (3018-15 and on)\CHIRAL-BAH-9-147(2)-1.00%IPA-1.00mL\_min-OJH.lcd  
 mAU

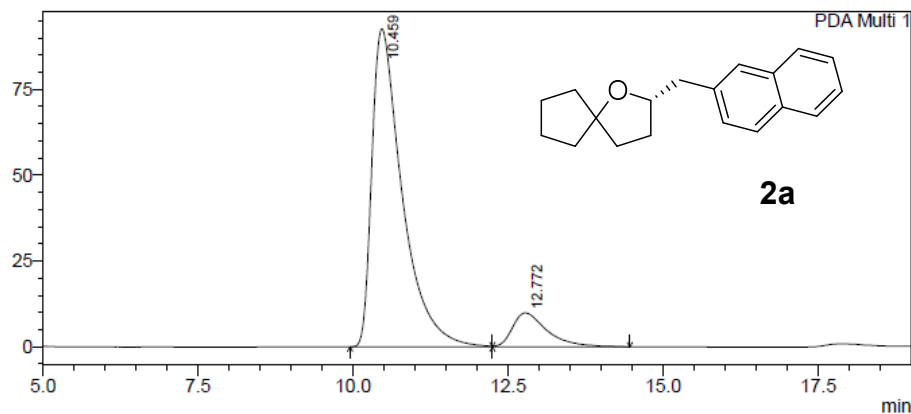

1 PDA Multi 1/254nm 4nm

PeakTable

| Peak# | Ret. Time | Area    | Height | Area %  | Height % |
|-------|-----------|---------|--------|---------|----------|
| 1     | 10.459    | 3154717 | 92708  | 89.034  | 90.370   |
| 2     | 12.772    | 388542  | 9879   | 10.966  | 9.630    |
| Total |           | 3543259 | 102587 | 100.000 | 100.000  |

C:\LabSolutions\Data\B. Hopkins\cyclopentylfused (3018-15 and on)\CHIRAL-BAH-9-147(2)-1.00%IPA-1.00mL\_min-OJH.lcd



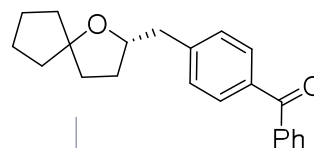

2b

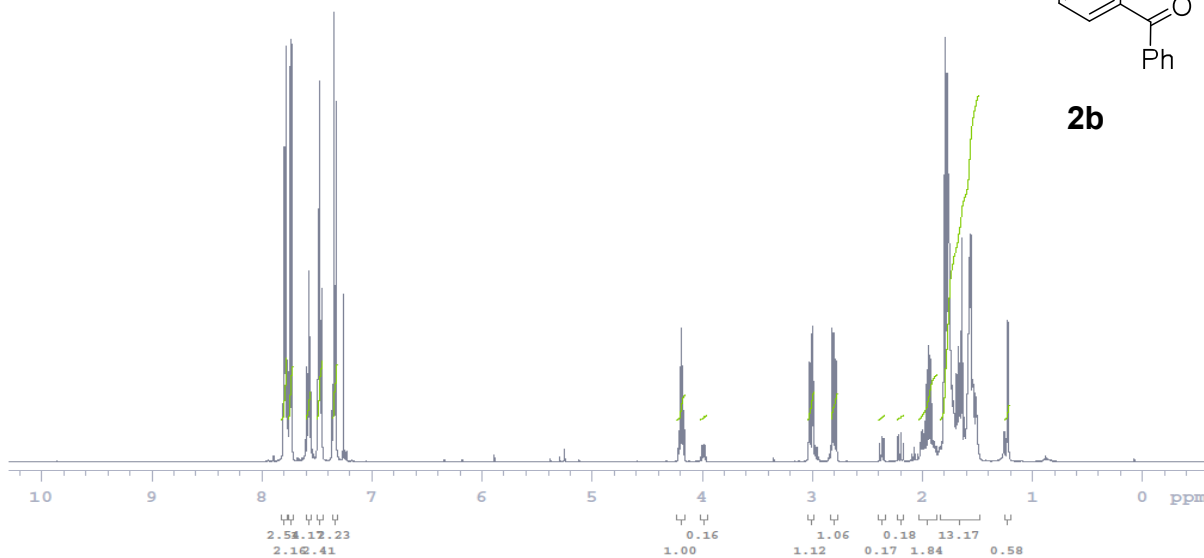

Data file: /home/bahopki/vnmrsys/data/BAH-9-180-3proton.fid

Plot date: 2015-05-08

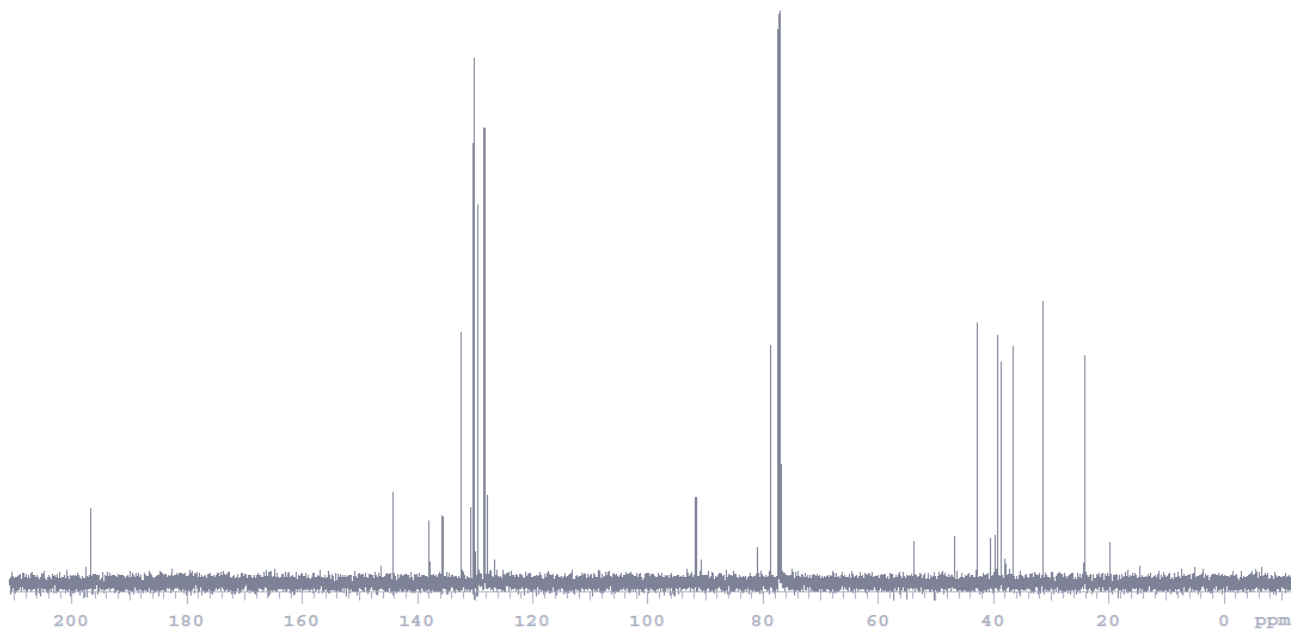

## ==== Shimadzu LCsolution Analysis Report ====

C:\...\Data\B. Hopkins\cyclopentylfused (3018-15 and on)\RAC-BAH-9-58(5)-1.00%IPA-1.00mL\_min-ADH.lcd  
 Acquired by : Admin  
 Sample Name : RAC-BAH-9-58(5)-1.00%IPA-1.00mL\_min-ADH  
 Sample ID :  
 Tray# : 1  
 Vial # : 1  
 Injection Volume : 1 uL  
 Data File Name : RAC-BAH-9-58(5)-1.00%IPA-1.00mL\_min-ADH.lcd  
 Method File Name : Cyclic Urea Method.lcm  
 Batch File Name :  
 Report File Name : Default.lcr  
 Data Acquired : 5/8/2015 1:22:52 PM  
 Data Processed : 5/8/2015 1:50:25 PM

### <Chromatogram>

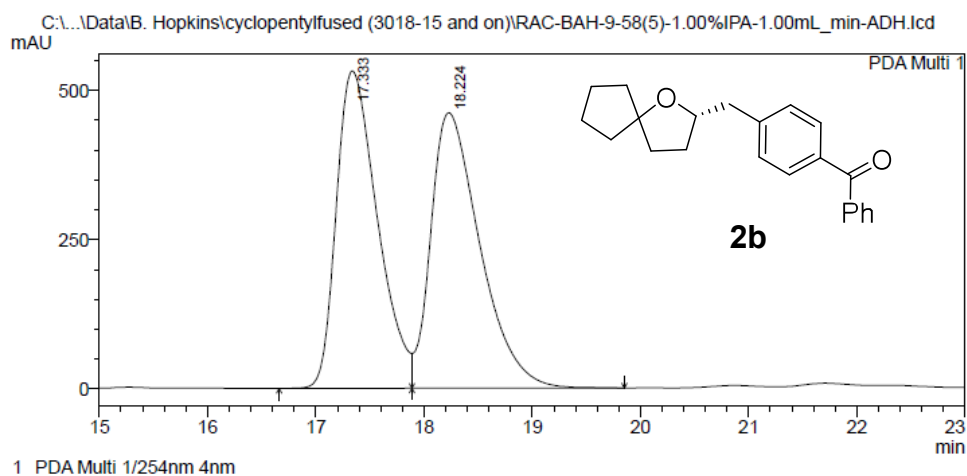

PeakTable

PDA Ch1 254nm 4nm

| Peak# | Ret. Time | Area     | Height | Area %  | Height % |
|-------|-----------|----------|--------|---------|----------|
| 1     | 17.333    | 14045763 | 531427 | 49.132  | 53.520   |
| 2     | 18.224    | 14541794 | 461515 | 50.868  | 46.480   |
| Total |           | 28587558 | 992942 | 100.000 | 100.000  |

C:\LabSolutions\Data\B. Hopkins\cyclopentylfused (3018-15 and on)\RAC-BAH-9-58(5)-1.00%IPA-1.00mL\_min-ADH.lcd

## ==== Shimadzu LCsolution Analysis Report ====

C:\...\Data\B. Hopkins\cyclopentylfused (3018-15 and on)\CHIRAL-BAH-9-180(3)-1.00%IPA-1.00mL\_min-ADH.lcd  
 Acquired by : Admin  
 Sample Name : CHIRAL-BAH-9-180(3)-1.00%IPA-1.00mL\_min-ADH  
 Sample ID :  
 Tray# : 1  
 Vial # : 1  
 Injection Volume : 1 uL  
 Data File Name : CHIRAL-BAH-9-180(3)-1.00%IPA-1.00mL\_min-ADH.lcd  
 Method File Name : Cyclic Urea Method.lcm  
 Batch File Name :  
 Report File Name : Default.lcr  
 Data Acquired : 5/8/2015 2:54:37 PM  
 Data Processed : 5/8/2015 3:18:40 PM

### <Chromatogram>

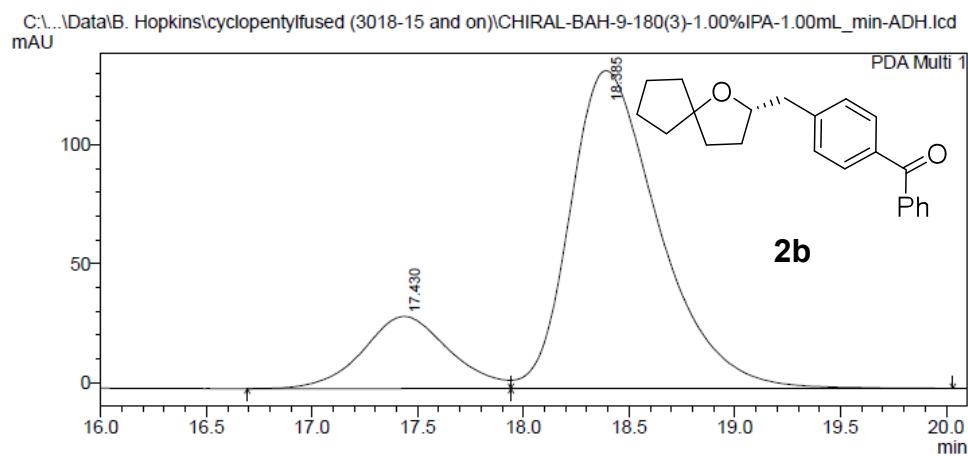

1 PDA Multi 1/254nm 4nm

PeakTable

PDA Ch1 254nm 4nm

| Peak# | Ret. Time | Area    | Height | Area %  | Height % |
|-------|-----------|---------|--------|---------|----------|
| 1     | 17.430    | 860939  | 30219  | 18.094  | 18.474   |
| 2     | 18.385    | 3897330 | 133358 | 81.906  | 81.526   |
| Total |           | 4758269 | 163577 | 100.000 | 100.000  |

C:\LabSolutions\Data\B. Hopkins\cyclopentylfused (3018-15 and on)\CHIRAL-BAH-9-180(3)-1.00%IPA-1.00mL\_min-ADH.lcd

## ==== Shimadzu LCsolution Analysis Report ====

C:\LabSolutions\Data\B. Hopkins\other THFS\RAC-BAH-9-149(1)-1.00%IPA-1.50mL\_min-OJH.lcd  
 Acquired by : Admin  
 Sample Name : RAC-BAH-9-149(1)-1.00%IPA-1.50mL\_min-OJH  
 Sample ID :  
 Tray# : 1  
 Vial # : 1  
 Injection Volume : 1 uL  
 Data File Name : RAC-BAH-9-149(1)-1.00%IPA-1.50mL\_min-OJH.lcd  
 Method File Name : Cyclic Urea Method.lcm  
 Batch File Name :  
 Report File Name : Default.lcr  
 Data Acquired : 4/12/2015 11:07:32 AM  
 Data Processed : 4/12/2015 11:53:14 AM

### <Chromatogram>

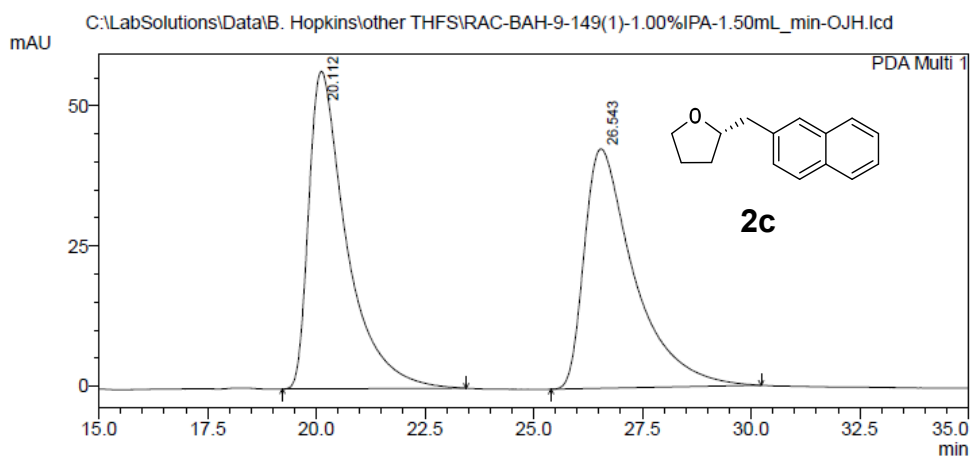

1 PDA Multi 1/230nm 4nm

PeakTable

PDA Ch1 230nm 4nm

| Peak# | Ret Time | Area    | Height | Area %  | Height % |
|-------|----------|---------|--------|---------|----------|
| 1     | 20.112   | 3431556 | 56621  | 50.157  | 57.013   |
| 2     | 26.543   | 3410131 | 42691  | 49.843  | 42.987   |
| Total |          | 6841687 | 99312  | 100.000 | 100.000  |

C:\LabSolutions\Data\B. Hopkins\other THFS\RAC-BAH-9-149(1)-1.00%IPA-1.50mL\_min-OJH.lcd

## ==== Shimadzu LCsolution Analysis Report ====

C:\LabSolutions\Data\B. Hopkins\other THFS\CHIRAL-BAH-9-166-1.00%IPA-1.50mL\_min-OJH.Icd  
 Acquired by : Admin  
 Sample Name : CHIRAL-BAH-9-166-1.00%IPA-1.50mL\_min-OJH  
 Sample ID :  
 Tray# : 1  
 Vial # : 1  
 Injection Volume : 1 uL  
 Data File Name : CHIRAL-BAH-9-166-1.00%IPA-1.50mL\_min-OJH.Icd  
 Method File Name : Cyclic Urea Method.lcm  
 Batch File Name :  
 Report File Name : Default.lcr  
 Data Acquired : 5/5/2015 6:02:55 PM  
 Data Processed : 5/5/2015 7:12:57 PM

### <Chromatogram>

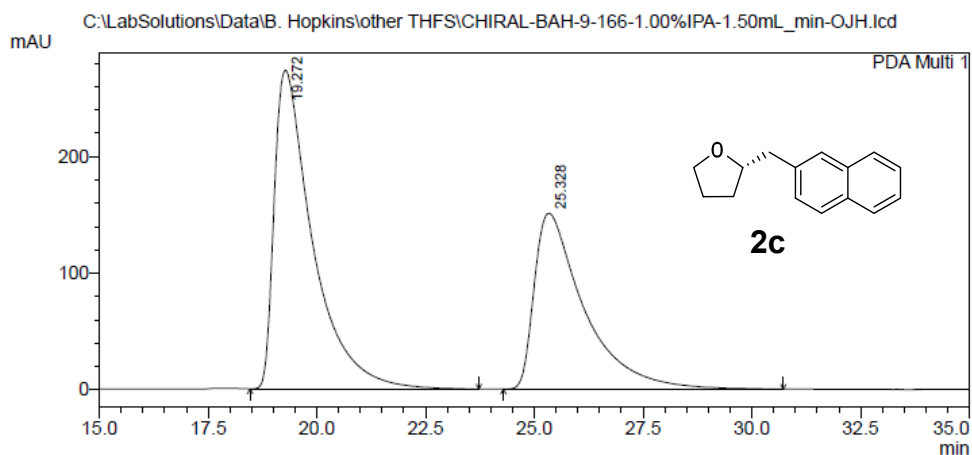

PeakTable

| Peak# | Ret. Time | Area     | Height | Area %  | Height % |
|-------|-----------|----------|--------|---------|----------|
| 1     | 19.272    | 16768556 | 273470 | 58.206  | 64.431   |
| 2     | 25.328    | 12040354 | 150966 | 41.794  | 35.569   |
| Total |           | 28808910 | 424436 | 100.000 | 100.000  |

C:\LabSolutions\Data\B. Hopkins\other THFS\CHIRAL-BAH-9-166-1.00%IPA-1.50mL\_min-OJH.Icd

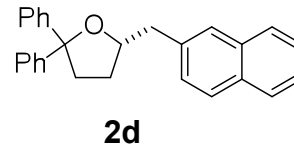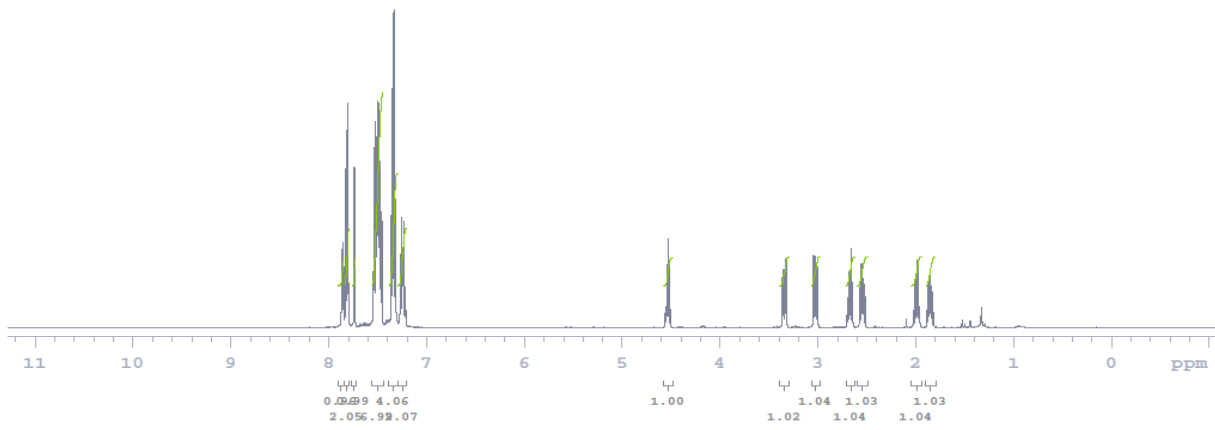

Data file: /misc/Tellurium/bahopki/vnmrsys/data/BAH-9-144-1proton.fid

Plot date: 2015-05-04

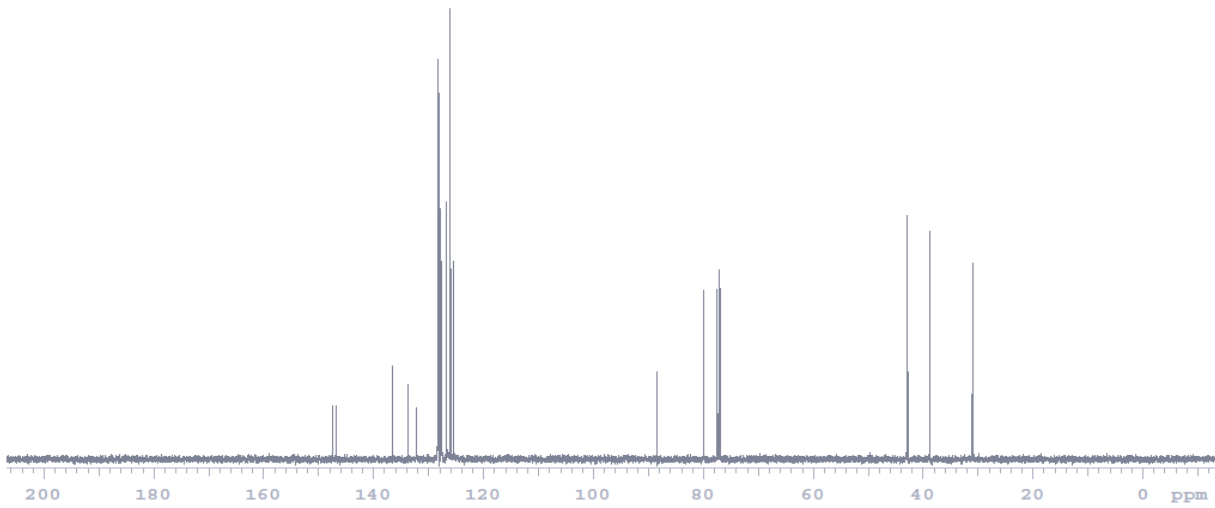

Data file: /misc/Tellurium/bahopki/vnmrsys/data/BAH-9-144-1carbon.fid

Plot date: 2015-05-04

## ==== Shimadzu LcSolution Analysis Report ====

C:\LabSolutions\Data\B. Hopkins\gemdiphenyl thf\RAC-BAH-9-27-2.00%IPA-1.00mL\_min-ADH-2.lcd  
 Acquired by : Admin  
 Sample Name : RAC-BAH-9-27-2.00%IPA-1.00mL\_min-ADH-2  
 Sample ID :  
 Tray# : 1  
 Vial # : 1  
 Injection Volume : 1 uL  
 Data File Name : RAC-BAH-9-27-2.00%IPA-1.00mL\_min-ADH-2.lcd  
 Method File Name : Cyclic Urea Method.lcm  
 Batch File Name :  
 Report File Name : Default.lcr  
 Data Acquired : 4/6/2015 11:36:45 AM  
 Data Processed : 4/6/2015 11:43:16 AM

### <Chromatogram>

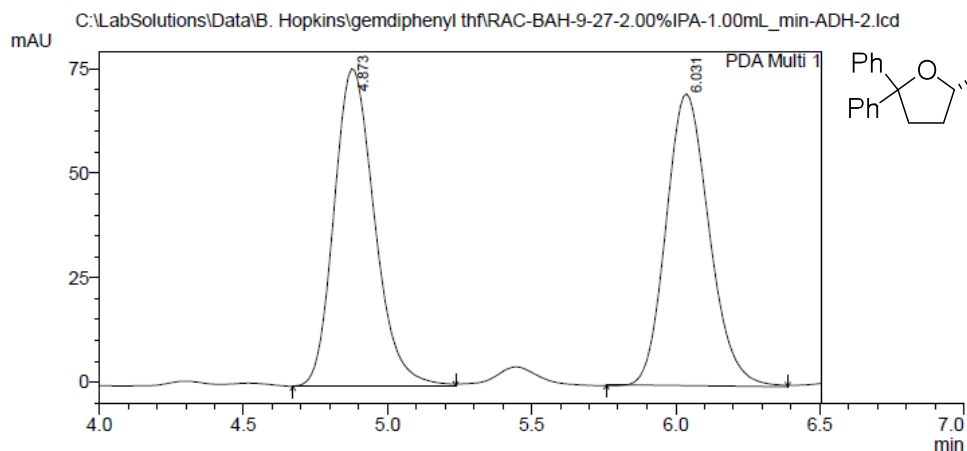

PeakTable

| Peak# | Ret. Time | Area    | Height | Area %  | Height % |
|-------|-----------|---------|--------|---------|----------|
| 1     | 4.873     | 742501  | 75958  | 50.586  | 52.078   |
| 2     | 6.031     | 725292  | 69896  | 49.414  | 47.922   |
| Total |           | 1467793 | 145854 | 100.000 | 100.000  |

C:\LabSolutions\Data\B. Hopkins\gemdiphenyl thf\RAC-BAH-9-27-2.00%IPA-1.00mL\_min-ADH-2.lcd

## ==== Shimadzu LcSolution Analysis Report ====

C:\LabSolutions\Data\B. Hopkins\gemdiphenyl thf\CHIRAL-BAH-9-144(1)-2.00%IPA-1.00mL\_min-ADH.lcd  
 Acquired by : Admin  
 Sample Name : CHIRAL-BAH-9-144(1)-2.00%IPA-1.00mL\_min-ADH  
 Sample ID :  
 Tray# : 1  
 Vial # : 1  
 Injection Volume : 1 uL  
 Data File Name : CHIRAL-BAH-9-144(1)-2.00%IPA-1.00mL\_min-ADH.lcd  
 Method File Name : Cyclic Urea Method.lcm  
 Batch File Name :  
 Report File Name : Default.lcr  
 Data Acquired : 4/7/2015 2:28:04 PM  
 Data Processed : 4/7/2015 2:43:36 PM

### <Chromatogram>

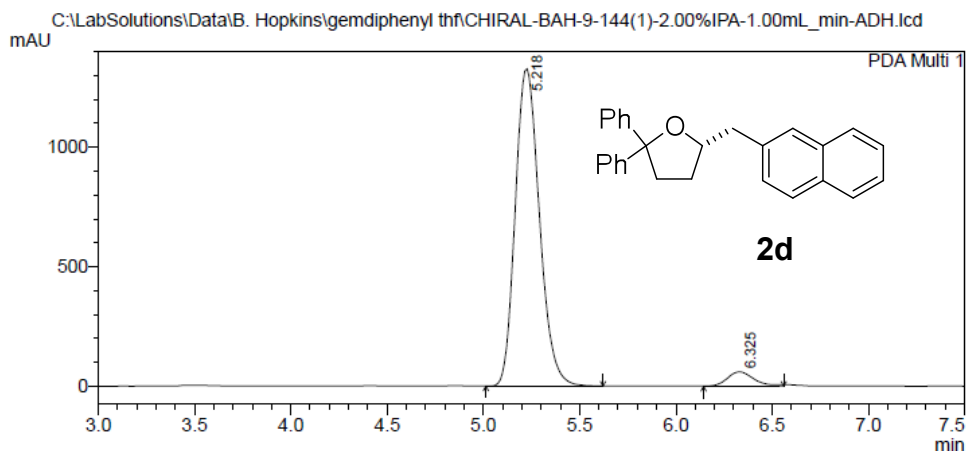

1 PDA Multi 1/254nm 4nm

PeakTable

| Peak# | Ret. Time | Area     | Height  | Area %  | Height % |
|-------|-----------|----------|---------|---------|----------|
| 1     | 5.218     | 11628104 | 1328650 | 95.102  | 95.642   |
| 2     | 6.325     | 598911   | 60539   | 4.898   | 4.358    |
| Total |           | 12227015 | 1389189 | 100.000 | 100.000  |

C:\LabSolutions\Data\B. Hopkins\gemdiphenyl thf\CHIRAL-BAH-9-144(1)-2.00%IPA-1.00mL\_min-ADH.lcd



## ==== Shimadzu LcSolution Analysis Report ====

C:\LabSolutions\Data\B. Hopkins\gemdiphenyl thf\CHIRAL-BAH-9-152(1)-2.00%IPA-1.00mL\_min-ADH-2.lcd  
 Acquired by : Admin  
 Sample Name : CHIRAL-BAH-9-152(1)-2.00%IPA-1.00mL\_min-ADH-2  
 Sample ID :  
 Tray# : 1  
 Vial # : 1  
 Injection Volume : 1 uL  
 Data File Name : CHIRAL-BAH-9-152(1)-2.00%IPA-1.00mL\_min-ADH-2.lcd  
 Method File Name : Cyclic Urea Method.lcm  
 Batch File Name :  
 Report File Name : Default.lcr  
 Data Acquired : 4/16/2015 1:32:51 PM  
 Data Processed : 4/16/2015 1:50:10 PM

### <Chromatogram>

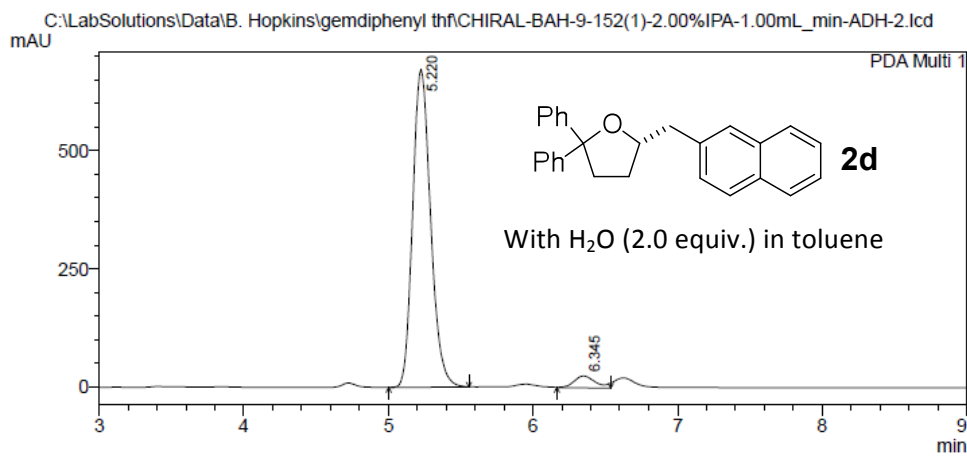

1 PDA Multi 1/254nm 4nm

PeakTable

PDA Ch1 254nm 4nm

| Peak# | Ret. Time | Area    | Height | Area %  | Height % |
|-------|-----------|---------|--------|---------|----------|
| 1     | 5.220     | 5795128 | 672196 | 95.568  | 96.400   |
| 2     | 6.345     | 268775  | 25101  | 4.432   | 3.600    |
| Total |           | 6063903 | 697297 | 100.000 | 100.000  |

C:\LabSolutions\Data\B. Hopkins\gemdiphenyl thf\CHIRAL-BAH-9-152(1)-2.00%IPA-1.00mL\_min-ADH-2.lcd

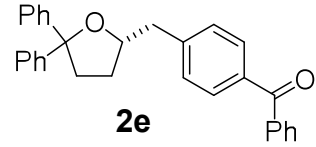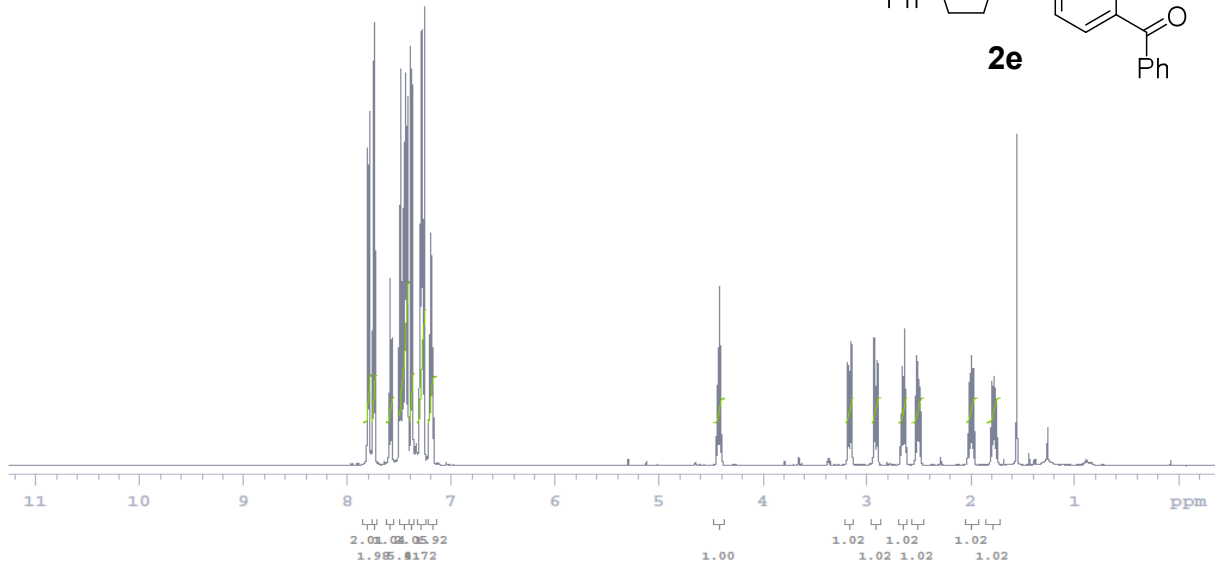

Data file: /home/bahopki/vnmrsys/data/BAH-9-178-2proton.fid

Plot date: 2015-05-08

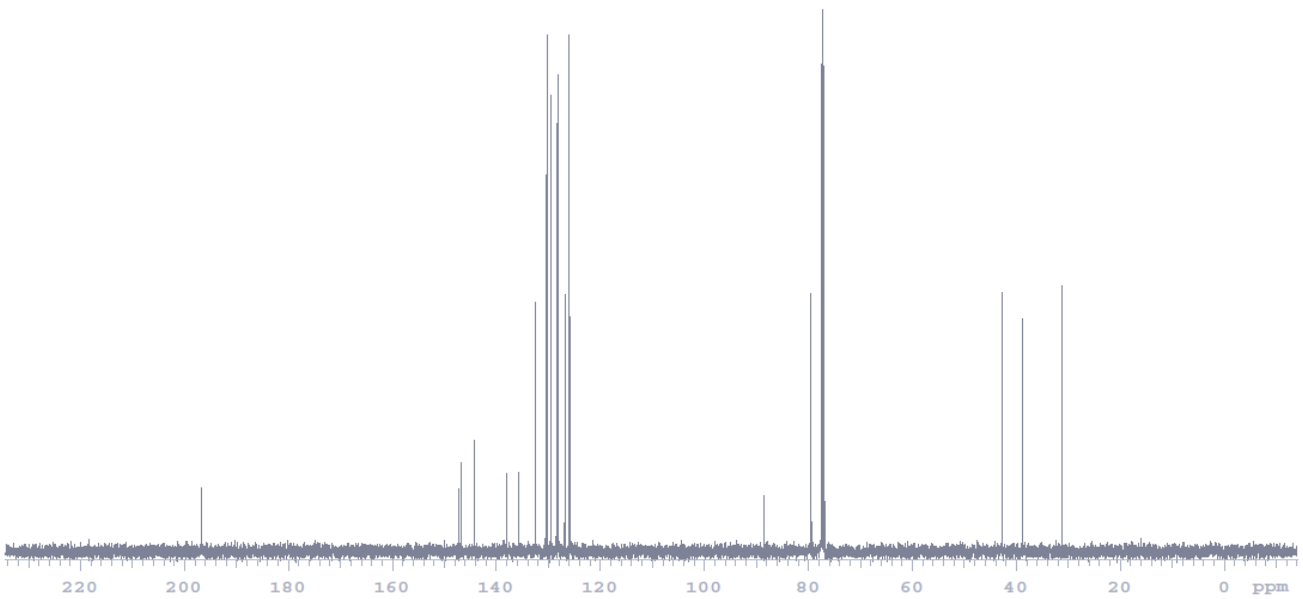

Data file: /home/bahopki/vnmrsys/data/BAH-9-178-2carbon.fid

Plot date: 2015-05-08

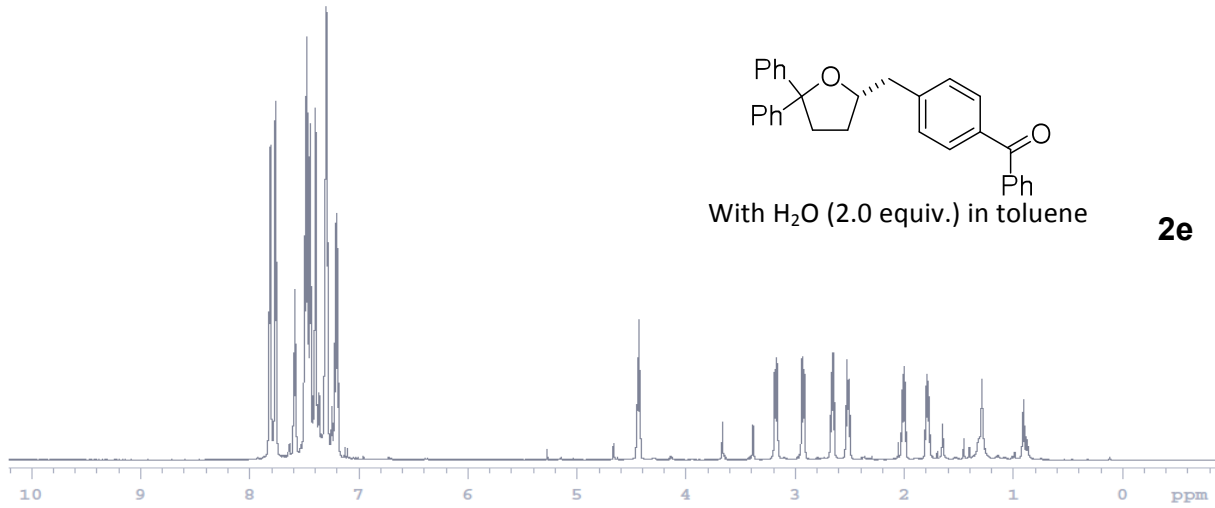

Data file /miso/Ytterbium/bahopki/vnmrsys/data/BAH-9-174-3proton.fid

Plot date 2015-05-08

## ==== Shimadzu LCsolution Analysis Report ====

C:\LabSolutions\Data\B. Hopkins\gemdiphenyl thf\RAC-BAH-9-163(2)-5.00%IPA-1.00mL\_min-ADH.lcd  
 Acquired by : Admin  
 Sample Name : RAC-BAH-9-163(2)-5.00%IPA-1.00mL\_min-ADH  
 Sample ID :  
 Tray# : 1  
 Vial # : 1  
 Injection Volume : 1 uL  
 Data File Name : RAC-BAH-9-163(2)-5.00%IPA-1.00mL\_min-ADH.lcd  
 Method File Name : Cyclic Urea Method.lcm  
 Batch File Name :  
 Report File Name : Default.lcr  
 Data Acquired : 4/22/2015 11:43:27 PM  
 Data Processed : 4/23/2015 12:14:45 AM

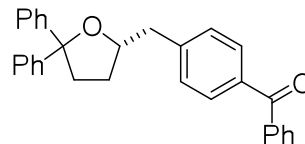

### <Chromatogram>

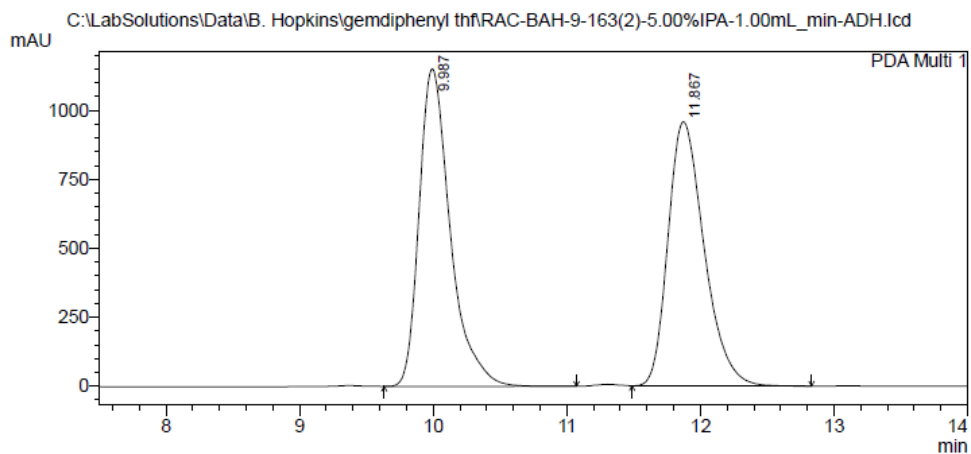

PeakTable

| Peak# | Ret. Time | Area     | Height  | Area %  | Height % |
|-------|-----------|----------|---------|---------|----------|
| 1     | 9.987     | 18652646 | 1152095 | 50.859  | 54.585   |
| 2     | 11.867    | 18022436 | 958560  | 49.141  | 45.415   |
| Total |           | 36675082 | 2110655 | 100.000 | 100.000  |

C:\LabSolutions\Data\B. Hopkins\gemdiphenyl thf\RAC-BAH-9-163(2)-5.00%IPA-1.00mL\_min-ADH.lcd

## ==== Shimadzu LCsolution Analysis Report ====

C:\LabSolutions\Data\B. Hopkins\gemdiphenyl thf\CHIRAL-BAH-9-171(1)-5.00%IPA-1.00mL\_min-ADH.lcd  
 Acquired by : Admin  
 Sample Name : CHIRAL-BAH-9-171(1)-5.00%IPA-1.00mL\_min-ADH  
 Sample ID :  
 Tray# : 1  
 Vial # : 1  
 Injection Volume : 1 uL  
 Data File Name : CHIRAL-BAH-9-171(1)-5.00%IPA-1.00mL\_min-ADH.lcd  
 Method File Name : Cyclic Urea Method.lcm  
 Batch File Name :  
 Report File Name : Default.lcr  
 Data Acquired : 5/2/2015 12:02:09 PM  
 Data Processed : 5/2/2015 12:44:56 PM

### <Chromatogram>

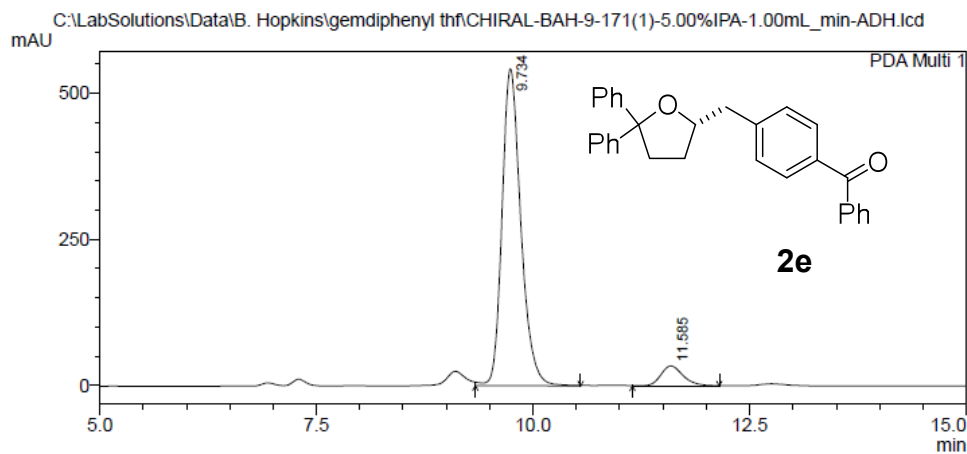

PeakTable

| Peak# | Ret. Time | Area    | Height | Area %  | Height % |
|-------|-----------|---------|--------|---------|----------|
| 1     | 9.734     | 8178331 | 542062 | 93.068  | 94.082   |
| 2     | 11.585    | 609165  | 34098  | 6.932   | 5.918    |
| Total |           | 8787496 | 576160 | 100.000 | 100.000  |

C:\LabSolutions\Data\B. Hopkins\gemdiphenyl thf\CHIRAL-BAH-9-171(1)-5.00%IPA-1.00mL\_min-ADH.lcd

## ==== Shimadzu LCsolution Analysis Report ====

C:\LabSolutions\Data\B. Hopkins\gemdiphenyl thf\CHIRAL-BAH-9-165(4)-5.00%IPA-1.00mL\_min-ADH.lcd  
 Acquired by : Admin  
 Sample Name : CHIRAL-BAH-9-165(4)-5.00%IPA-1.00mL\_min-ADH  
 Sample ID :  
 Tray# : 1  
 Vial # : 1  
 Injection Volume : 1 uL  
 Data File Name : CHIRAL-BAH-9-165(4)-5.00%IPA-1.00mL\_min-ADH.lcd  
 Method File Name : Cyclic Urea Method.lcm  
 Batch File Name :  
 Report File Name : Default.lcr  
 Data Acquired : 4/24/2015 7:47:58 AM  
 Data Processed : 4/24/2015 8:04:49 AM

### <Chromatogram>

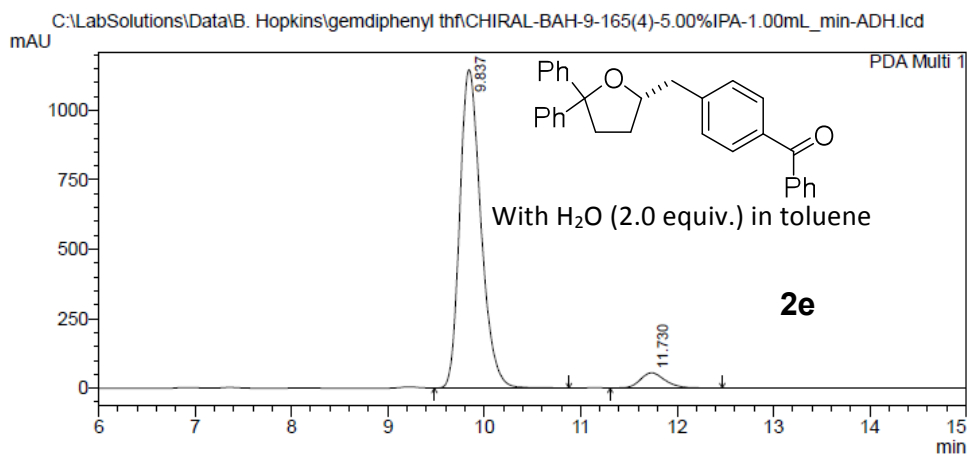

1 PDA Multi 1/254nm 4nm

PeakTable

PDA Ch1 254nm 4nm

| Peak# | Ret. Time | Area     | Height  | Area %  | Height % |
|-------|-----------|----------|---------|---------|----------|
| 1     | 9.837     | 17433060 | 1144879 | 94.713  | 95.438   |
| 2     | 11.730    | 973158   | 54726   | 5.287   | 4.562    |
| Total |           | 18406218 | 1199605 | 100.000 | 100.000  |

C:\LabSolutions\Data\B. Hopkins\gemdiphenyl thf\CHIRAL-BAH-9-165(4)-5.00%IPA-1.00mL\_min-ADH.lcd

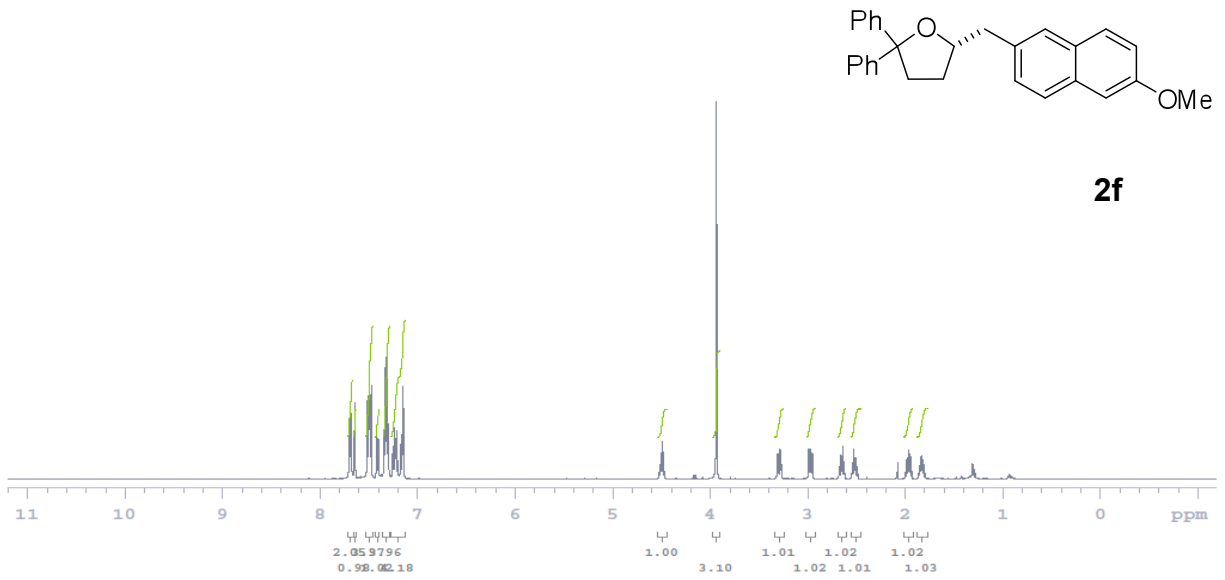

Data file /misc/Tellurium/bahopki/vnmrsys/data/BAH-9-144-2proton.fid

Plot date 2015-05-04

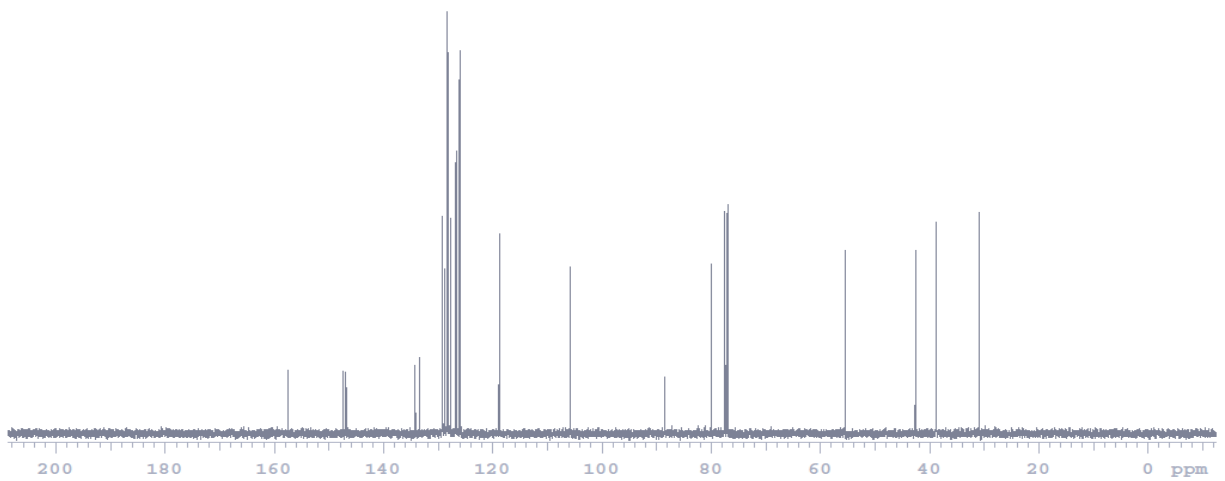

Data file /misc/Tellurium/bahopki/vnmrsys/data/BAH-9-144-2carbon.fid

Plot date 2015-05-04

## ==== Shimadzu LCsolution Analysis Report ====

C:\LabSolutions\Data\B. Hopkins\gemdiphenyl thf\RAC-BAH-9-142(1)-2.00%IPA-1.00mL\_min-ADH.Icd  
 Acquired by : Admin  
 Sample Name : RAC-BAH-9-142(1)-2.00%IPA-1.00mL\_min-ADH  
 Sample ID :  
 Tray# : 1  
 Vial # : 1  
 Injection Volume : 1 uL  
 Data File Name : RAC-BAH-9-142(1)-2.00%IPA-1.00mL\_min-ADH.Icd  
 Method File Name : Cyclic Urea Method.lcm  
 Batch File Name :  
 Report File Name : Default.lcr  
 Data Acquired : 4/6/2015 1:02:20 PM  
 Data Processed : 4/6/2015 1:28:36 PM

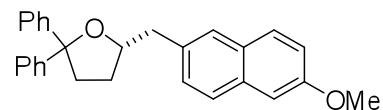

### <Chromatogram>

**2f**
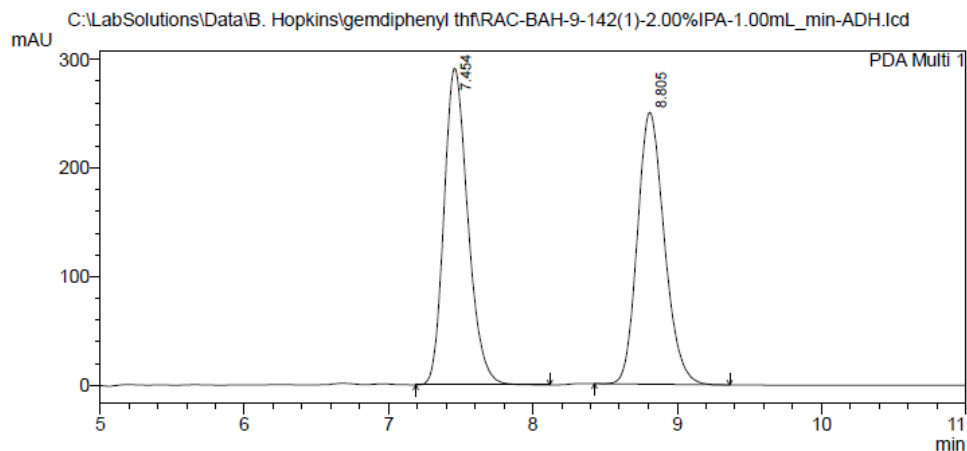

PeakTable

PDA Ch1 254nm 4nm

| Peak# | Ret. Time | Area    | Height | Area %  | Height % |
|-------|-----------|---------|--------|---------|----------|
| 1     | 7.454     | 3362119 | 291487 | 50.829  | 53.807   |
| 2     | 8.805     | 3252515 | 250237 | 49.171  | 46.193   |
| Total |           | 6614634 | 541724 | 100.000 | 100.000  |

C:\LabSolutions\Data\B. Hopkins\gemdiphenyl thf\RAC-BAH-9-142(1)-2.00%IPA-1.00mL\_min-ADH.Icd



## ==== Shimadzu LCsolution Analysis Report ====

C:\LabSolutions\Data\B. Hopkins\gemdiphenyl thf\CHIRAL-BAH-9-144(2)-2.00%IPA-1.00mL\_min-ADH.lcd  
 Acquired by : Admin  
 Sample Name : CHIRAL-BAH-9-144(2)-2.00%IPA-1.00mL\_min-ADH  
 Sample ID :  
 Tray# : 1  
 Vial # : 1  
 Injection Volume : 1 uL  
 Data File Name : CHIRAL-BAH-9-144(2)-2.00%IPA-1.00mL\_min-ADH.lcd  
 Method File Name : Cyclic Urea Method.lcm  
 Batch File Name :  
 Report File Name : Default.lcr  
 Data Acquired : 4/7/2015 3:49:10 PM  
 Data Processed : 4/7/2015 4:59:12 PM

### <Chromatogram>

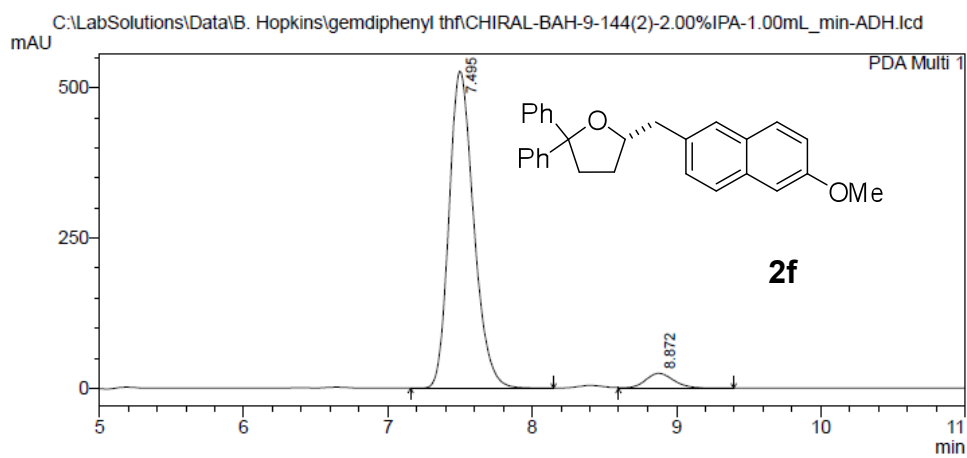

PeakTable

PDA Ch1 254nm 4nm

| Peak# | Ret. Time | Area    | Height | Area %  | Height % |
|-------|-----------|---------|--------|---------|----------|
| 1     | 7.495     | 6299925 | 527840 | 94.803  | 95.510   |
| 2     | 8.872     | 345355  | 24817  | 5.197   | 4.490    |
| Total |           | 6645280 | 552657 | 100.000 | 100.000  |

C:\LabSolutions\Data\B. Hopkins\gemdiphenyl thf\CHIRAL-BAH-9-144(2)-2.00%IPA-1.00mL\_min-ADH.lcd

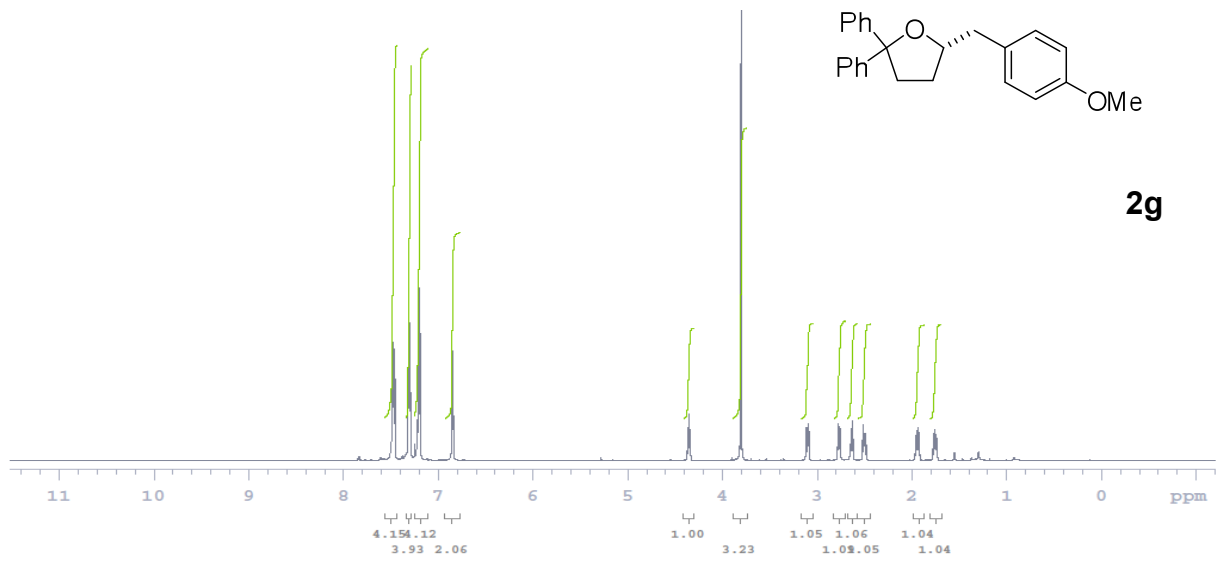

Data file /home/bahopki/vnmrsys/data/BAH-9-178-4proton.fid

Plot date 2015-05-08

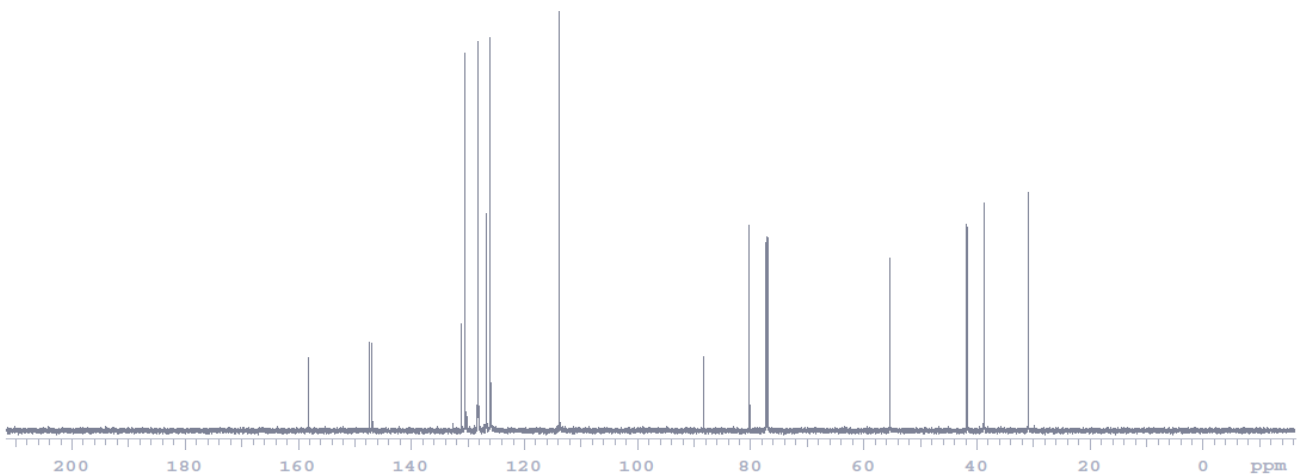

Data file /home/bahopki/vnmrsys/data/BAH-9-178-4carbon.fid

Plot date 2015-05-08

## ==== Shimadzu LcSolution Analysis Report ====

C:\LabSolutions\Data\B. Hopkins\gemdiphenyl thf\RAC-BAH-9-158(1)-1.00%IPA-1.00mL\_min-ADH.lcd  
 Acquired by : Admin  
 Sample Name : RAC-BAH-9-158(1)-1.00%IPA-1.00mL\_min-ADH  
 Sample ID :  
 Tray# : 1  
 Vial # : 1  
 Injection Volume : 1 uL  
 Data File Name : RAC-BAH-9-158(1)-1.00%IPA-1.00mL\_min-ADH.lcd  
 Method File Name : Cyclic Urea Method.lcm  
 Batch File Name :  
 Report File Name : Default.lcr  
 Data Acquired : 4/20/2015 11:12:08 PM  
 Data Processed : 4/20/2015 11:25:00 PM

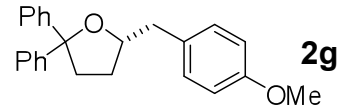

### <Chromatogram>

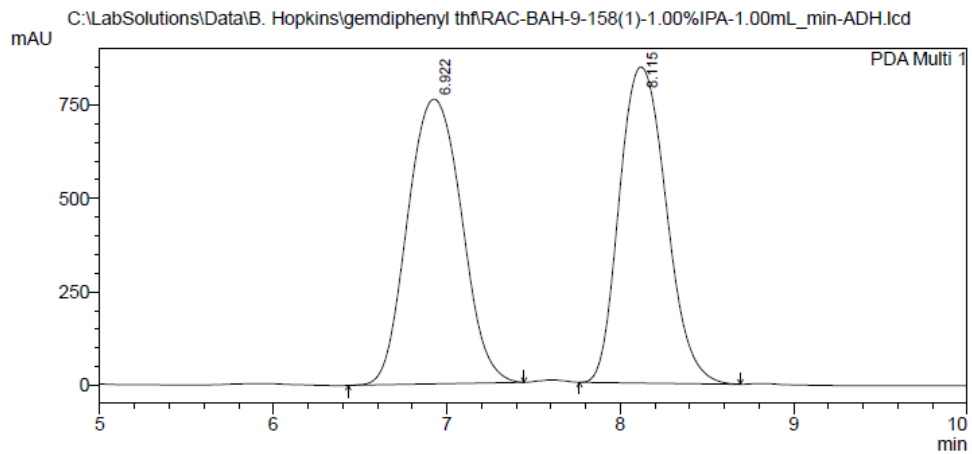

PeakTable

| Peak# | Ret. Time | Area     | Height  | Area %  | Height % |
|-------|-----------|----------|---------|---------|----------|
| 1     | 6.922     | 16482730 | 762059  | 50.931  | 47.384   |
| 2     | 8.115     | 15880069 | 846210  | 49.069  | 52.616   |
| Total |           | 32362798 | 1608269 | 100.000 | 100.000  |

C:\LabSolutions\Data\B. Hopkins\gemdiphenyl thf\RAC-BAH-9-158(1)-1.00%IPA-1.00mL\_min-ADH.lcd

## ==== Shimadzu LCsolution Analysis Report ====

C:\LabSolutions\Data\B. Hopkins\gemdiphenyl thf\CHIRAL-BAH-9-170(I)-1.00%IPA-1.0mL\_min-ADH.lcd  
 Acquired by : Admin  
 Sample Name : CHIRAL-BAH-9-170(I)-1.00%IPA-1.0mL\_min-ADH  
 Sample ID :  
 Tray# : 1  
 Vial # : 1  
 Injection Volume : 1 uL  
 Data File Name : CHIRAL-BAH-9-170(I)-1.00%IPA-1.0mL\_min-ADH.lcd  
 Method File Name : Cyclic Urea Method.lcm  
 Batch File Name :  
 Report File Name : Default.lcr  
 Data Acquired : 5/1/2015 6:05:32 PM  
 Data Processed : 5/1/2015 6:46:19 PM

### <Chromatogram>

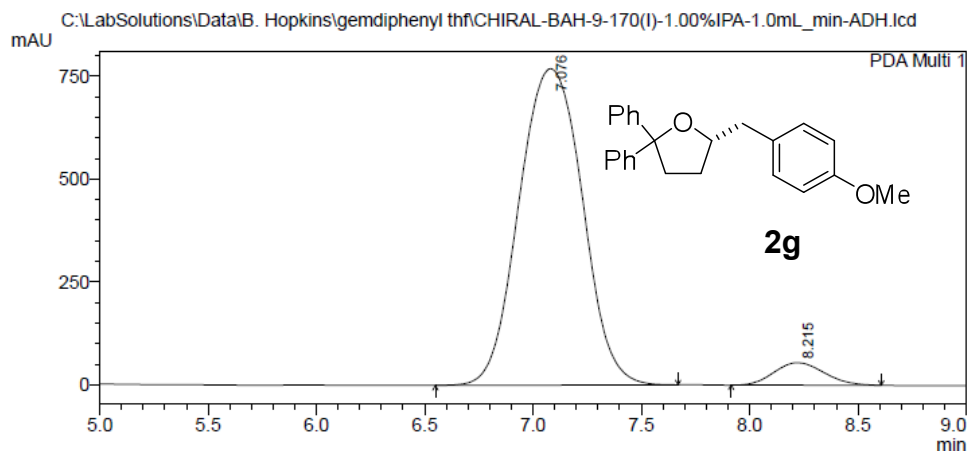

PeakTable

| Peak# | Ret. Time | Area     | Height | Area %  | Height % |
|-------|-----------|----------|--------|---------|----------|
| 1     | 7.076     | 15706142 | 769699 | 94.696  | 93.385   |
| 2     | 8.215     | 879721   | 54526  | 5.304   | 6.615    |
| Total |           | 16585863 | 824224 | 100.000 | 100.000  |

C:\LabSolutions\Data\B. Hopkins\gemdiphenyl thf\CHIRAL-BAH-9-170(I)-1.00%IPA-1.0mL\_min-ADH.lcd

## ==== Shimadzu LCsolution Analysis Report ====

C:\LabSolutions\Data\B. Hopkins\gemdiphenyl thf\CHIRAL-BAH-9-158(3)-1.00%IPA-1.00mL\_min-ADH.lcd  
 Acquired by : Admin  
 Sample Name : CHIRAL-BAH-9-158(3)-1.00%IPA-1.00mL\_min-ADH  
 Sample ID :  
 Tray# : 1  
 Vial # : 1  
 Injection Volume : 1 uL  
 Data File Name : CHIRAL-BAH-9-158(3)-1.00%IPA-1.00mL\_min-ADH.lcd  
 Method File Name : Cyclic Urea Method.lcm  
 Batch File Name :  
 Report File Name : Default.lcr  
 Data Acquired : 4/21/2015 12:21:25 AM  
 Data Processed : 4/21/2015 12:31:07 AM

### <Chromatogram>

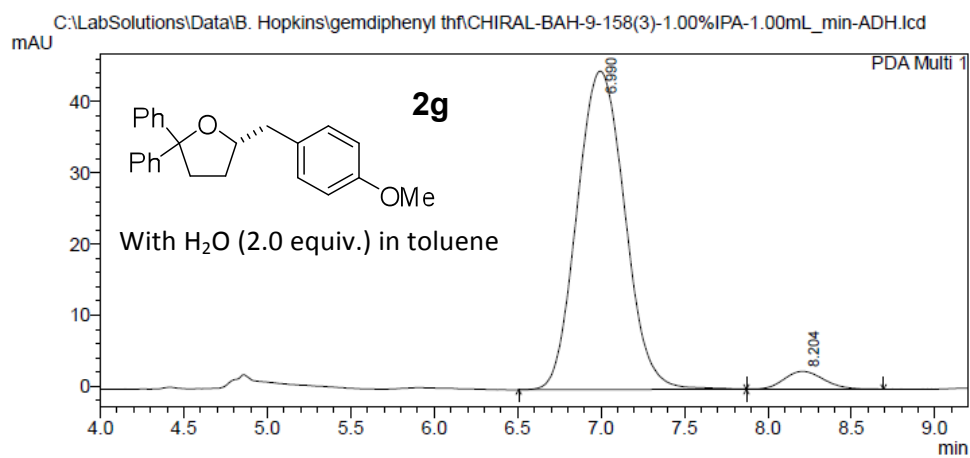

PeakTable

| Peak# | Ret. Time | Area   | Height | Area %  | Height % |
|-------|-----------|--------|--------|---------|----------|
| 1     | 6.990     | 891515 | 44749  | 95.481  | 94.667   |
| 2     | 8.204     | 42192  | 2521   | 4.519   | 5.333    |
| Total |           | 933707 | 47270  | 100.000 | 100.000  |

C:\LabSolutions\Data\B. Hopkins\gemdiphenyl thf\CHIRAL-BAH-9-158(3)-1.00%IPA-1.00mL\_min-ADH.lcd

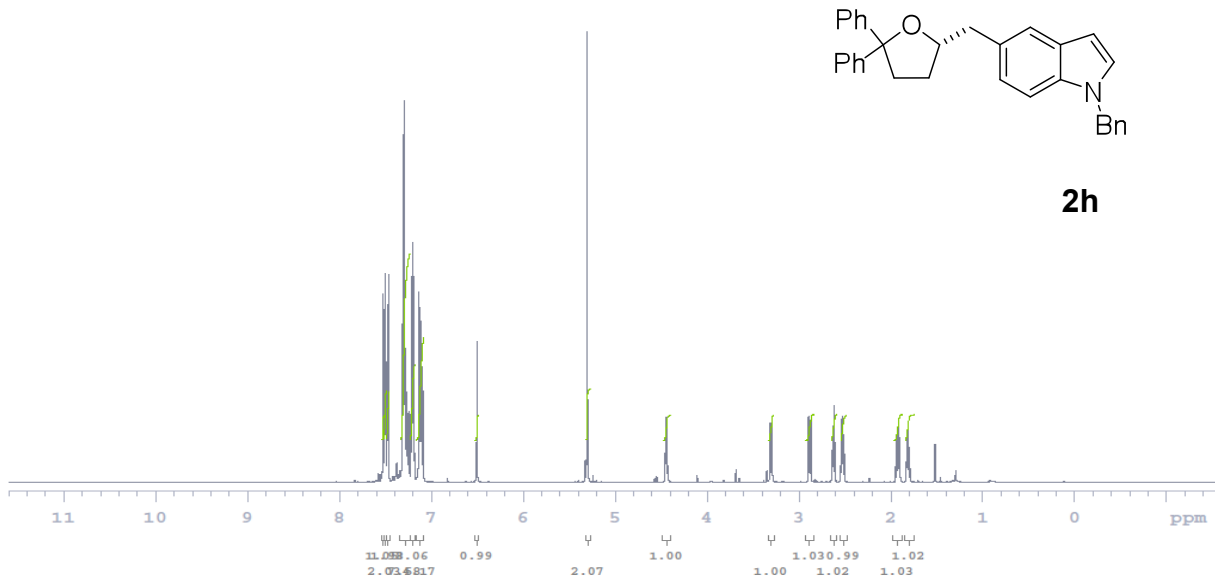

Data file: /misc/Ytterbium/bahopki/vnmrsys/data/BAH-9-175-2proton.fid

Plot date: 2015-05-08

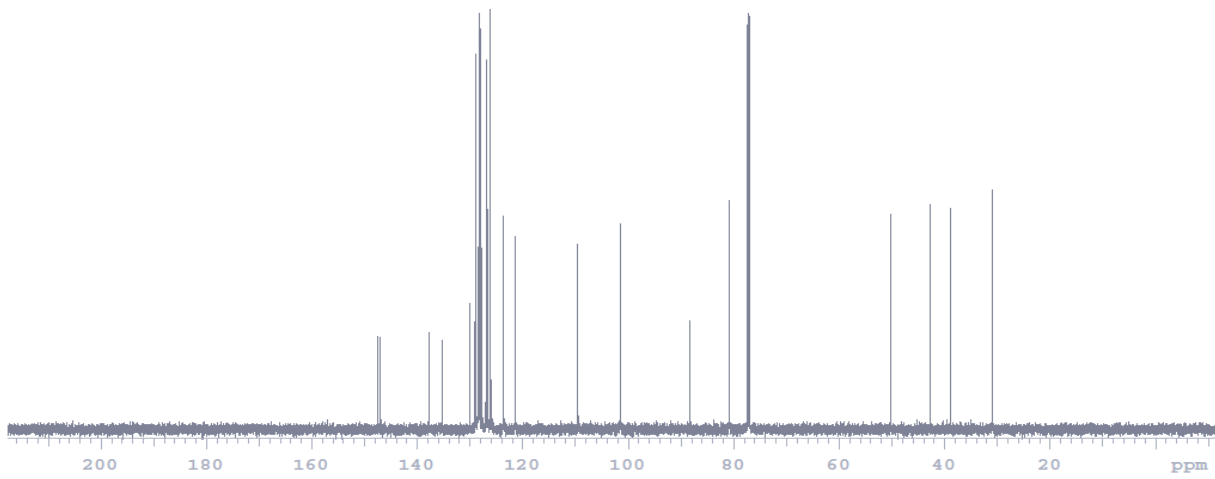

Data file: /misc/Ytterbium/bahopki/vnmrsys/data/BAH-9-175-2carbon.fid

Plot date: 2015-05-08

## ==== Shimadzu LCsolution Analysis Report ====

C:\LabSolutions\Data\B. Hopkins\gemdiphenyl thf\RAC-BAH-9-167(1)-2.00%IPA-1.00mL\_min-ADH.lcd  
 Acquired by : Admin  
 Sample Name : RAC-BAH-9-167(1)-2.00%IPA-1.00mL\_min-ADH  
 Sample ID :  
 Tray# : 1  
 Vial # : 1  
 Injection Volume : 1 uL  
 Data File Name : RAC-BAH-9-167(1)-2.00%IPA-1.00mL\_min-ADH.lcd  
 Method File Name : Cyclic Urea Method.lcm  
 Batch File Name :  
 Report File Name : Default.lcr  
 Data Acquired : 5/3/2015 9:57:24 PM  
 Data Processed : 5/3/2015 10:28:12 PM

### <Chromatogram>

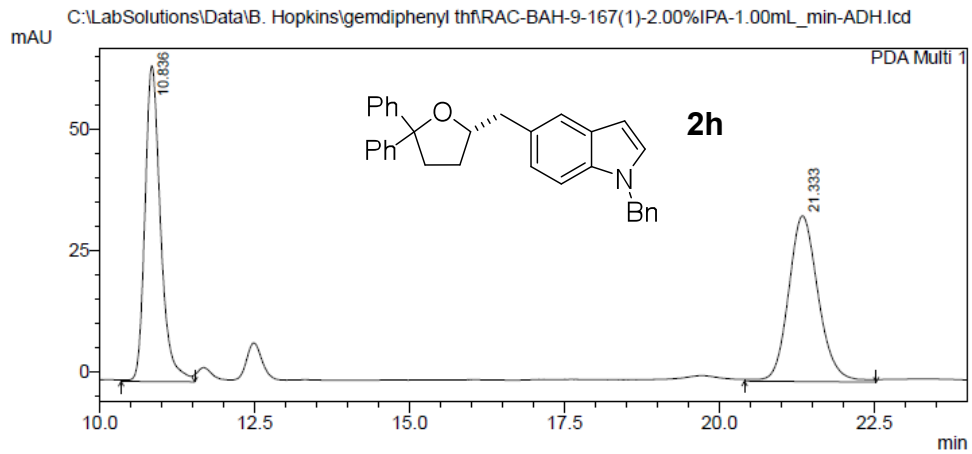

PeakTable

PDA Ch1 254nm 4nm

| Peak# | Ret. Time | Area    | Height | Area %  | Height % |
|-------|-----------|---------|--------|---------|----------|
| 1     | 10.836    | 1143534 | 65081  | 49.978  | 65.593   |
| 2     | 21.333    | 1144518 | 34138  | 50.022  | 34.407   |
| Total |           | 2288053 | 99219  | 100.000 | 100.000  |

C:\LabSolutions\Data\B. Hopkins\gemdiphenyl thf\RAC-BAH-9-167(1)-2.00%IPA-1.00mL\_min-ADH.lcd

## ==== Shimadzu LCsolution Analysis Report ====

C:\LabSolutions\Data\B. Hopkins\gemdiphenyl thf\CHIRAL-BAH-9-175(2)-2.00%IPA-1.00mL\_min-ADH.lcd  
 Acquired by : Admin  
 Sample Name : CHIRAL-BAH-9-175(2)-2.00%IPA-1.00mL\_min-ADH  
 Sample ID :  
 Tray# : 1  
 Vial # : 1  
 Injection Volume : 1 uL  
 Data File Name : CHIRAL-BAH-9-175(2)-2.00%IPA-1.00mL\_min-ADH.lcd  
 Method File Name : Cyclic Urea Method.lcm  
 Batch File Name :  
 Report File Name : Default.lcr  
 Data Acquired : 5/6/2015 3:20:11 AM  
 Data Processed : 5/6/2015 3:43:56 AM

### <Chromatogram>

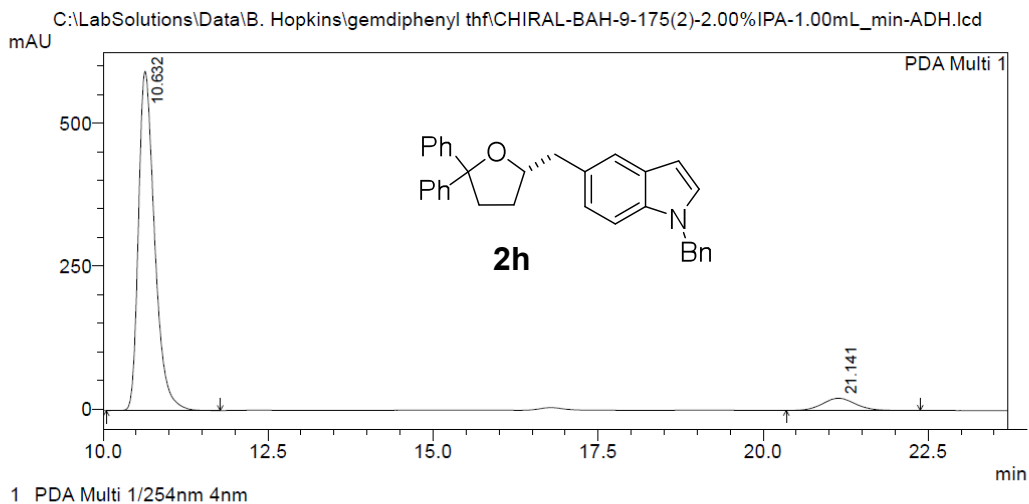

PeakTable

| PDA Ch1 254nm 4nm |           |          |        |         |          |
|-------------------|-----------|----------|--------|---------|----------|
| Peak#             | Ret. Time | Area     | Height | Area %  | Height % |
| 1                 | 10.632    | 10096553 | 593722 | 93.160  | 96.529   |
| 2                 | 21.141    | 741340   | 21347  | 6.840   | 3.471    |
| Total             |           | 10837893 | 615069 | 100.000 | 100.000  |

C:\LabSolutions\Data\B. Hopkins\gemdiphenyl thf\CHIRAL-BAH-9-175(2)-2.00%IPA-1.00mL\_min-ADH.lcd



## ==== Shimadzu LCsolution Analysis Report ====

C:\LabSolutions\Data\B. Hopkins\gemdiphenyl thf\RAC-BAH-9-138(1)-1.00%IPA-0.50mL\_min-ADH.lcd  
 Acquired by : Admin  
 Sample Name : RAC-BAH-9-138(1)-1.00%IPA-0.50mL\_min-ADH  
 Sample ID :  
 Tray# : 1  
 Vial # : 1  
 Injection Volume : 1 uL  
 Data File Name : RAC-BAH-9-138(1)-1.00%IPA-0.50mL\_min-ADH.lcd  
 Method File Name : Cyclic Urea Method.lcm  
 Batch File Name :  
 Report File Name : Default.lcr  
 Data Acquired : 4/3/2015 2:58:02 PM  
 Data Processed : 4/3/2015 3:22:05 PM

### <Chromatogram>

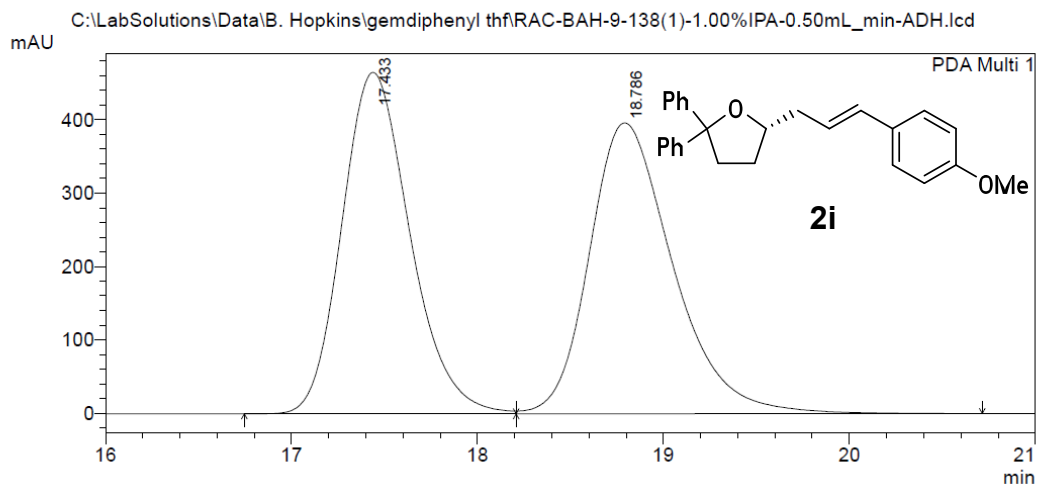

PeakTable

PDA Ch1 254nm 4nm

| Peak# | Ret. Time | Area     | Height | Area %  | Height % |
|-------|-----------|----------|--------|---------|----------|
| 1     | 17.433    | 11809441 | 465170 | 48.852  | 54.004   |
| 2     | 18.786    | 12364382 | 396186 | 51.148  | 45.996   |
| Total |           | 24173823 | 861356 | 100.000 | 100.000  |

C:\LabSolutions\Data\B. Hopkins\gemdiphenyl thf\RAC-BAH-9-138(1)-1.00%IPA-0.50mL\_min-ADH.lcd

## ==== Shimadzu LCsolution Analysis Report ====

C:\LabSolutions\Data\B. Hopkins\gemdiphenyl thf\CHIRAL-BAH-9-138(2)-1.00%IPA-0.50mL\_min-ADH.lcd  
 Acquired by : Admin  
 Sample Name : CHIRAL-BAH-9-138(2)-1.00%IPA-0.50mL\_min-ADH  
 Sample ID :  
 Tray# : 1  
 Vial # : 1  
 Injection Volume : 1 uL  
 Data File Name : CHIRAL-BAH-9-138(2)-1.00%IPA-0.50mL\_min-ADH.lcd  
 Method File Name : Cyclic Urea Method.lcm  
 Batch File Name :  
 Report File Name : Default.lcr  
 Data Acquired : 4/3/2015 3:26:59 PM  
 Data Processed : 4/3/2015 4:37:01 PM

### <Chromatogram>

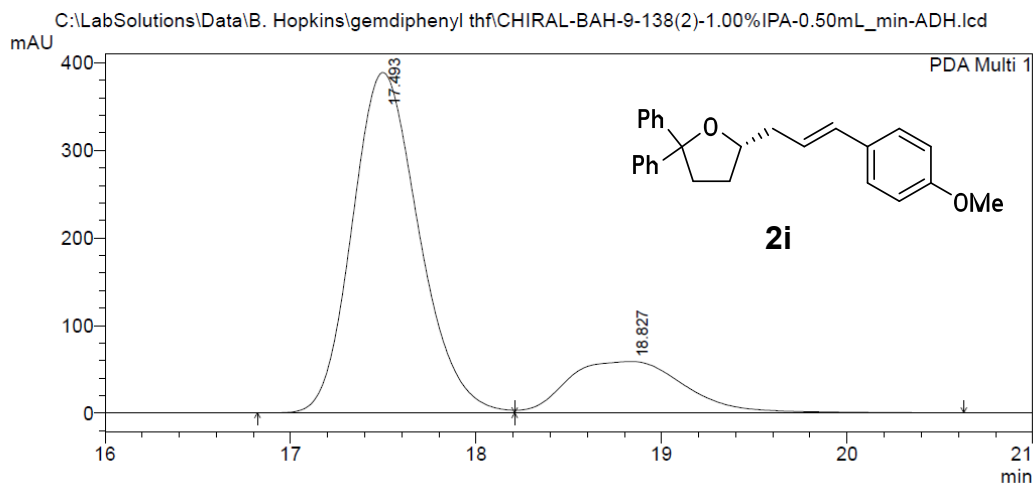

PeakTable

| Peak# | Ret. Time | Area     | Height | Area %  | Height % |
|-------|-----------|----------|--------|---------|----------|
| 1     | 17.493    | 9690833  | 388542 | 79.180  | 86.888   |
| 2     | 18.827    | 2548227  | 58633  | 20.820  | 13.112   |
| Total |           | 12239059 | 447175 | 100.000 | 100.000  |

C:\LabSolutions\Data\B. Hopkins\gemdiphenyl thf\CHIRAL-BAH-9-138(2)-1.00%IPA-0.50mL\_min-ADH.lcd

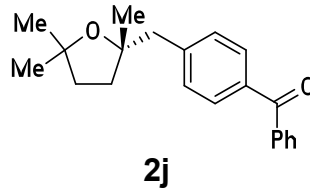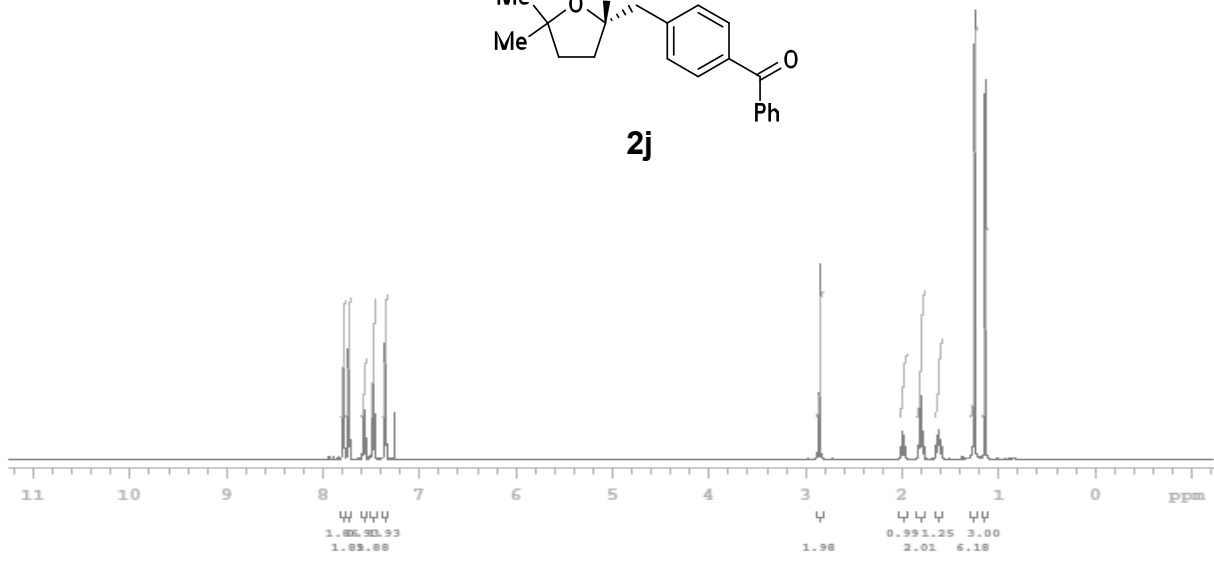

Data file: misc\Telurum\garietzz\vmrnsys\data\zgg\_jpw.2.197.3.H1.fid

Plot date: 2015-05-14

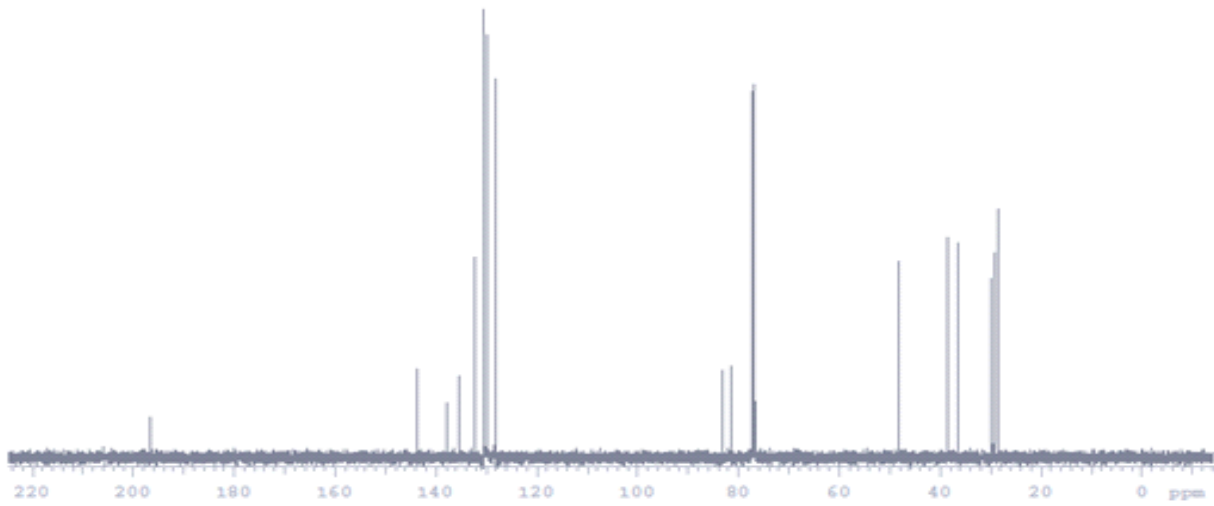

Data file: misc\Telurum\garietzz\vmrnsys\data\zgg\_jpw.2.197.4.C13.fid

Plot date: 2015-05-14

## ==== Shimadzu LCsolution Analysis Report ====

C:\LabSolutions\Data\Zac G\RAC-ZJG-2-189C-1-DPEPhos-4bromobenzophenone-2.00%IPA-01.0mL\_min-ADH.lcd  
 Acquired by : Admin  
 Sample Name : RAC-ZJG-2-189C-1-DPEPhos-4bromobenzophenone-2.00%IPA-01.0mL\_min  
 Sample ID :  
 Tray# : 1  
 Vail # : 1  
 Injection Volume : 1 uL  
 Data File Name : RAC-ZJG-2-189C-1-DPEPhos-4bromobenzophenone-2.00%IPA-01.0mL\_min-ADH.lcd  
 Method File Name : Cyclic Urea Method.lcm  
 Batch File Name :  
 Report File Name : Default.lcr  
 Data Acquired : 4/29/2015 2:38:55 PM  
 Data Processed : 4/29/2015 2:57:12 PM

### <Chromatogram>

C:\LabSolutions\Data\Zac G\RAC-ZJG-2-189C-1-DPEPhos-4bromobenzophenone-2.00%IPA-01.0mL\_min-ADH.lcd  
 mAU

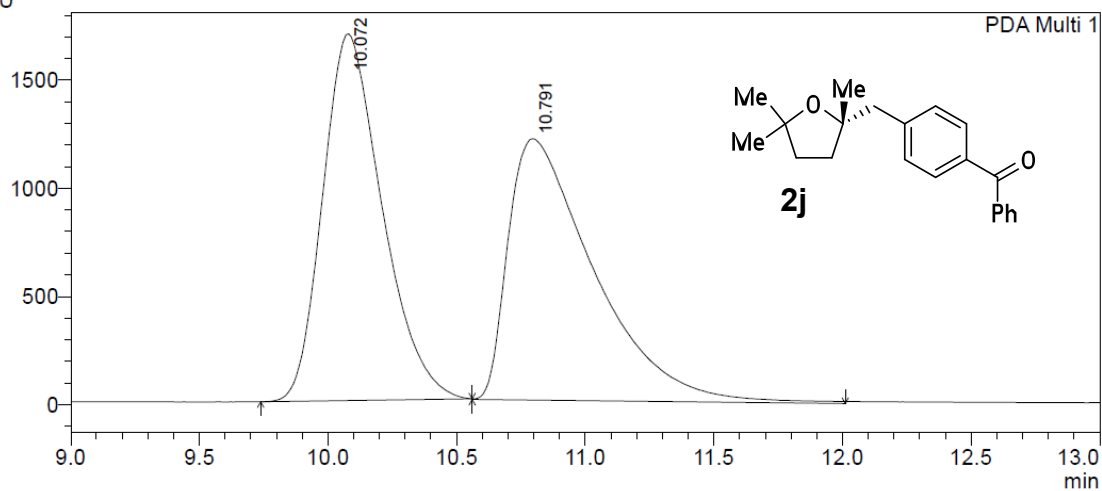

1 PDA Multi 1/195nm 4nm

PeakTable

PDA Ch1 195nm 4nm

| Peak# | Ret. Time | Area     | Height  | Area %  | Height % |
|-------|-----------|----------|---------|---------|----------|
| 1     | 10.072    | 27237637 | 1695761 | 49.332  | 58.394   |
| 2     | 10.791    | 27974754 | 1208227 | 50.668  | 41.606   |
| Total |           | 55212392 | 2903988 | 100.000 | 100.000  |

## ==== Shimadzu LCsolution Analysis Report ====

C:\LabSolutions\Data\Zac G\CHIRAL-ZJG-2-197-4bromobenzophenon-2.00%IPA-01.0mL\_minADH.lcd  
 Acquired by : Admin  
 Sample Name : CHIRAL-ZJG-2-197-4bromobenzophenon-2.00%IPA-01.0mL\_minADH  
 Sample ID :  
 Tray# : 1  
 Vail # : 1  
 Injection Volume : 1 uL  
 Data File Name : CHIRAL-ZJG-2-197-4bromobenzophenon-2.00%IPA-01.0mL\_minADH.lcd  
 Method File Name : Cyclic Urea Method.lcm  
 Batch File Name :  
 Report File Name : Default.lcr  
 Data Acquired : 5/2/2015 11:08:59 AM  
 Data Processed : 5/2/2015 11:24:17 AM

### <Chromatogram>

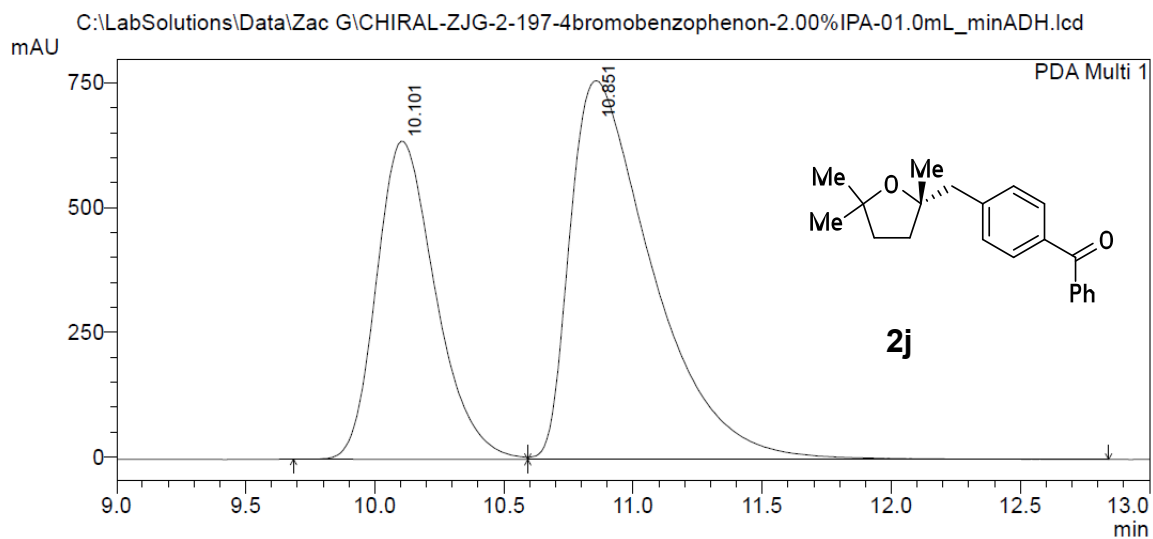

PeakTable

| PDA Ch1 195nm 4nm |           |          |         |         |          |  |
|-------------------|-----------|----------|---------|---------|----------|--|
| Peak#             | Ret. Time | Area     | Height  | Area %  | Height % |  |
| 1                 | 10.101    | 10171837 | 637898  | 37.522  | 45.663   |  |
| 2                 | 10.851    | 16936870 | 759064  | 62.478  | 54.337   |  |
| Total             |           | 27108707 | 1396962 | 100.000 | 100.000  |  |

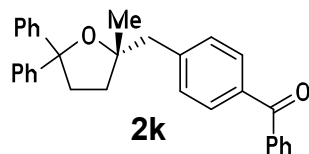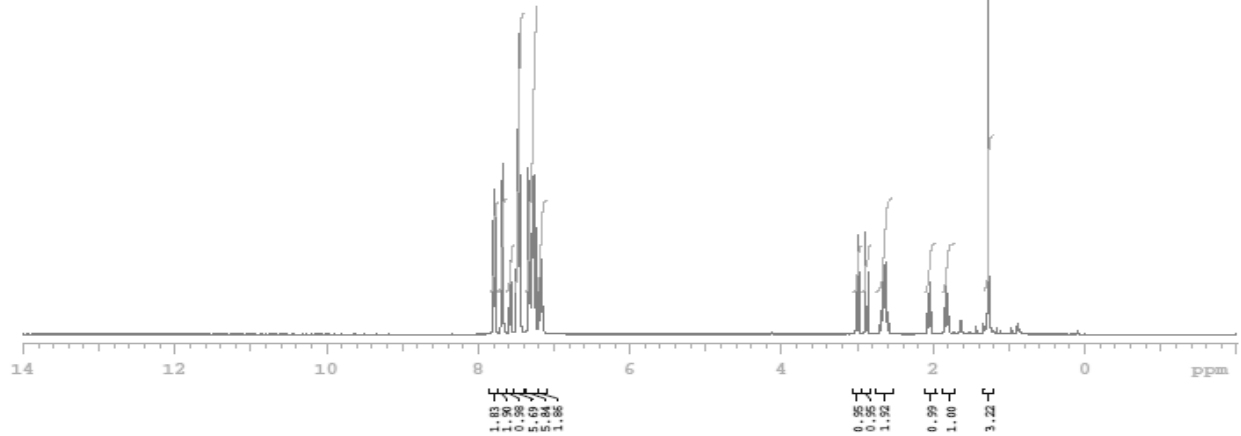

Data file: /home/garietcz/vnmr/sys/data/zjg\_jpw.3.6.5.H1.fid

Plot date: 2015-05-16

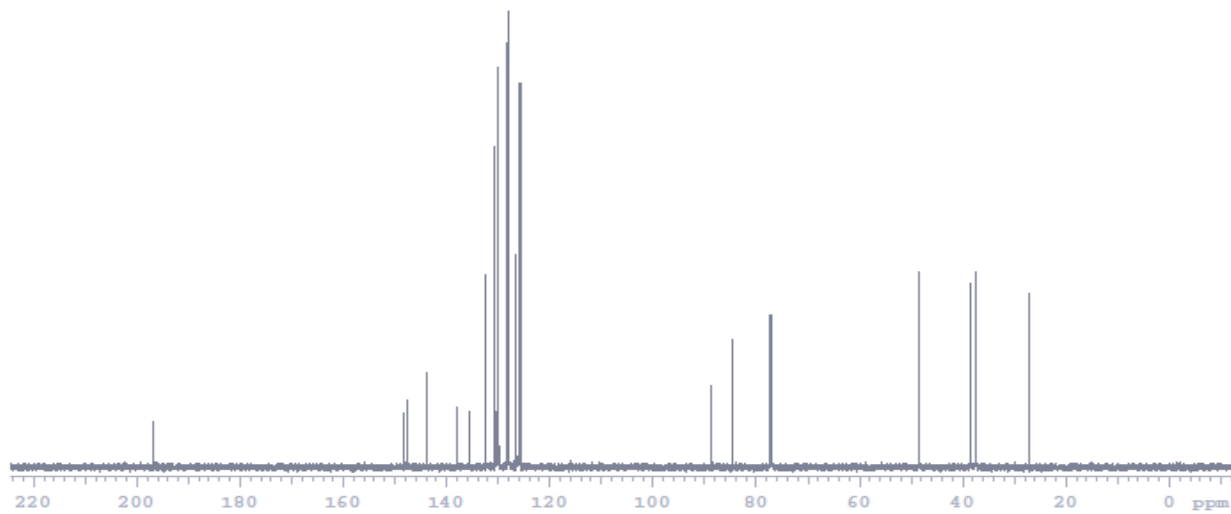

Data file: /misc/Teikurum/garietcz/vnmr/sys/data/zjg\_jpw.2.208.B4.C13.fid

Plot date: 2015-05-14

## ==== Shimadzu LCsolution Analysis Report ====

C:\LabSolutions\Data\Zac G\RAC-ZJG-2-201A-1-DPEPhos-4bromobenzophenone-2.00%IPA-01.0mL\_min1.lcd  
 Acquired by : Admin  
 Sample Name : RAC-ZJG-2-201-1-DPEPhos-4bromobenzophenone-2.00%IPA-01.0mL\_min1  
 Sample ID :  
 Tray# : 1  
 Vail # : 1  
 Injection Volume : 1 uL  
 Data File Name : RAC-ZJG-2-201A-1-DPEPhos-4bromobenzophenone-2.00%IPA-01.0mL\_min1.lcd  
 Method File Name : Cyclic Urea Method.lcm  
 Batch File Name :  
 Report File Name : Default.lcr  
 Data Acquired : 5/14/2015 5:38:49 PM  
 Data Processed : 5/14/2015 6:13:17 PM

### <Chromatogram>

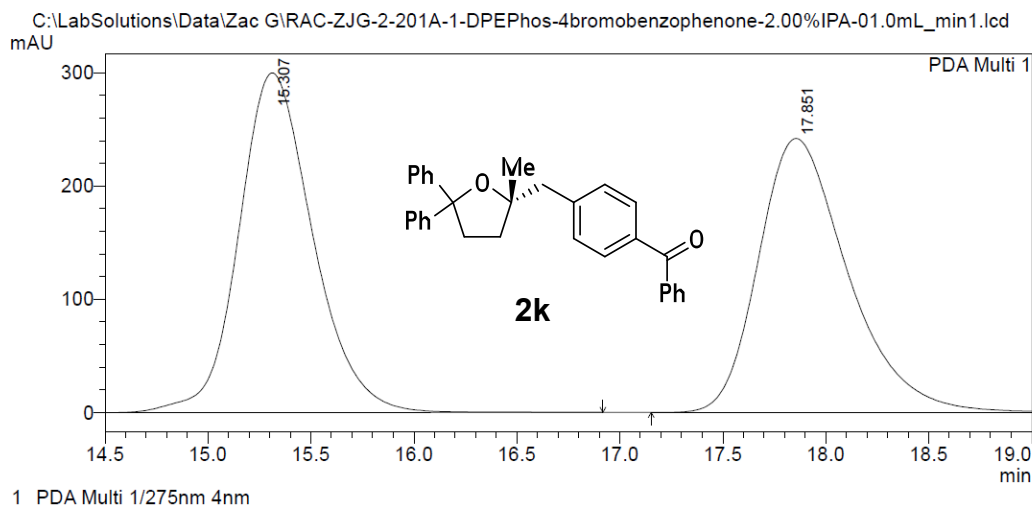

PeakTable

| PDA Ch1 275nm 4nm |           |          |        |         |          |
|-------------------|-----------|----------|--------|---------|----------|
| Peak#             | Ret. Time | Area     | Height | Area %  | Height % |
| 1                 | 15.307    | 7497473  | 299832 | 50.619  | 55.349   |
| 2                 | 17.851    | 7314070  | 241882 | 49.381  | 44.651   |
| Total             |           | 14811543 | 541715 | 100.000 | 100.000  |

C:\LabSolutions\Data\Zac G\RAC-ZJG-2-201A-1-DPEPhos-4bromobenzophenone-2.00%IPA-01.0mL\_min1.lcd

## ==== Shimadzu LCsolution Analysis Report ====

C:\LabSolutions\Data\Zac G\CHIRAL-ZJG-2-208B-Bligand-4bromobenzophenone-2.00%IPA-01.0mL\_min-ADH.lcd  
 Acquired by : Admin  
 Sample Name : CHIRAL-ZJG-2-208B-Bligand-4bromobenzophenone-2.00%IPA-01.0mL\_mi  
 Sample ID :  
 Tray# : 1  
 Vail # : 1  
 Injection Volume : 1 uL  
 Data File Name : CHIRAL-ZJG-2-208B-Bligand-4bromobenzophenone-2.00%IPA-01.0mL\_min-ADH.lcd  
 Method File Name : Cyclic Urea Method.lcm  
 Batch File Name :  
 Report File Name : Default.lcr  
 Data Acquired : 5/14/2015 4:44:49 PM  
 Data Processed : 5/14/2015 5:15:41 PM

### <Chromatogram>

C:\LabSolutions\Data\Zac G\CHIRAL-ZJG-2-208B-Bligand-4bromobenzophenone-2.00%IPA-01.0mL\_min-ADH.lcd

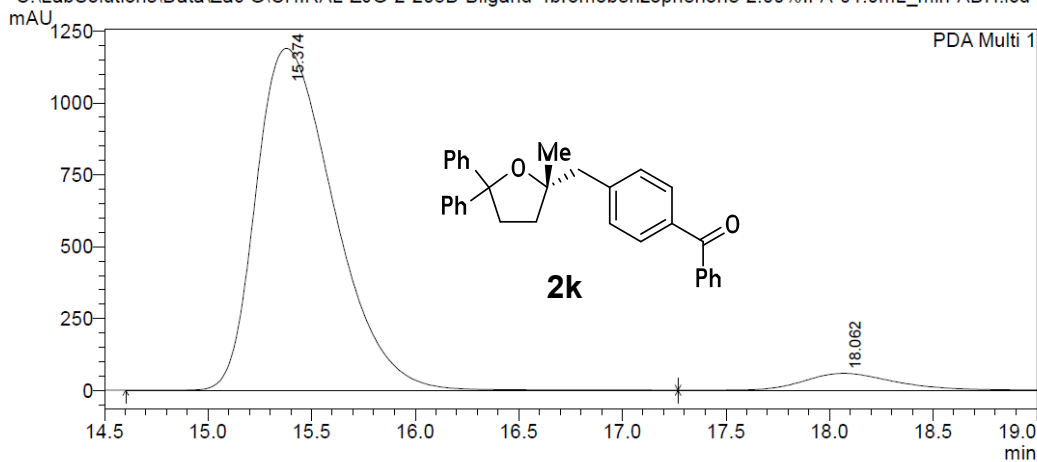

PeakTable

PDA Ch1 275nm 4nm

| Peak# | Ret. Time | Area     | Height  | Area %  | Height % |
|-------|-----------|----------|---------|---------|----------|
| 1     | 15.374    | 31151956 | 1189142 | 94.565  | 95.305   |
| 2     | 18.062    | 1790297  | 58578   | 5.435   | 4.695    |
| Total |           | 32942253 | 1247721 | 100.000 | 100.000  |

C:\LabSolutions\Data\Zac G\CHIRAL-ZJG-2-208B-Bligand-4bromobenzophenone-2.00%IPA-01.0mL\_min-ADH.lcd



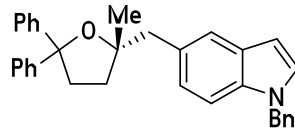

21

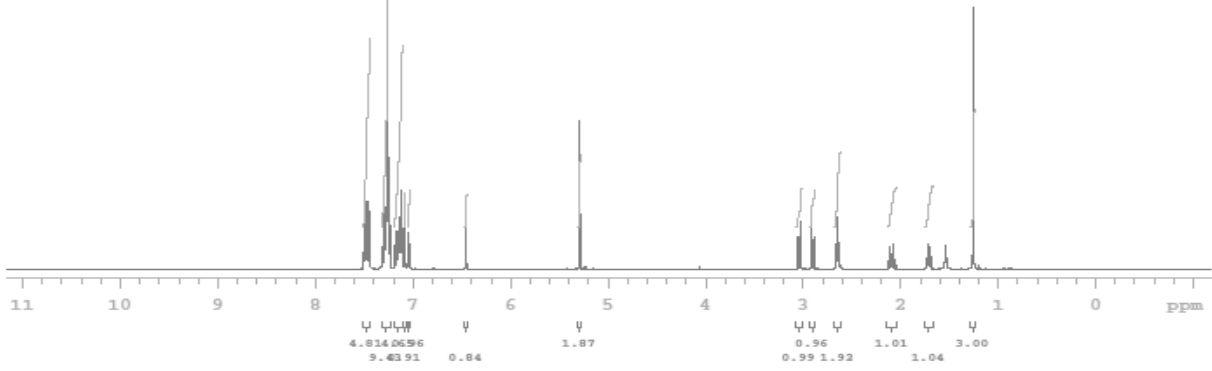

Data file: /misc/Teikurum/garietcz/vnmrsys/data/zgg\_jpw.2.208.C.4.H1.fid

Plot date: 2015-05-14

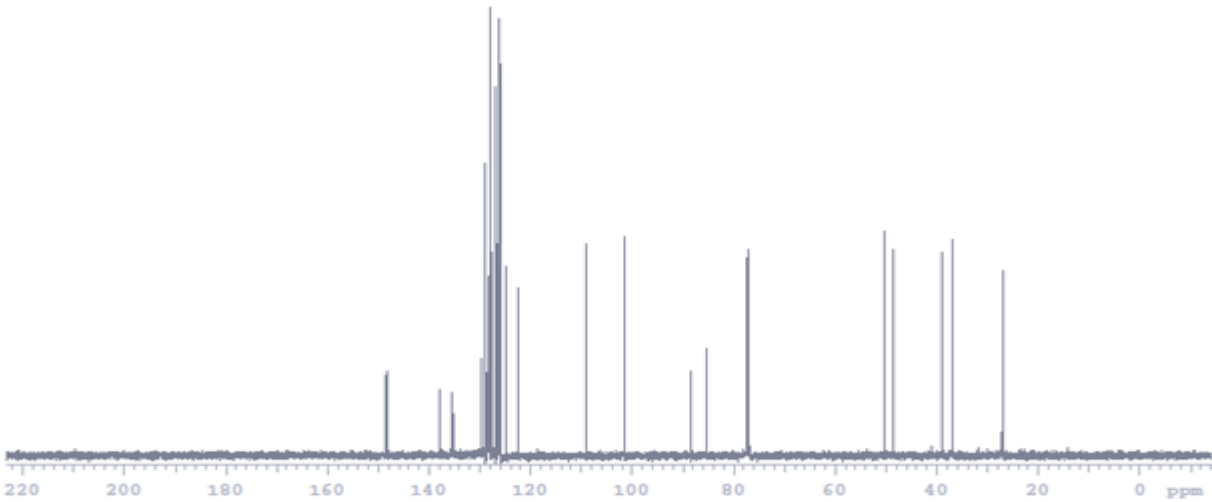

Data file: /misc/Teikurum/garietcz/vnmrsys/data/zgg\_jpw.3.6.A.3.C13.fid

Plot date: 2015-05-14

## ==== Shimadzu LCsolution Analysis Report ====

C:\LabSolutions\Data\Zac G\RAC-ZJG-2-206-1-DPEPhos-bromobnindole-1.00%IPA-01.0mL\_min1.lcd  
 Acquired by : Admin  
 Sample Name : RAC-ZJG-2-206-1-DPEPhos-bromobnindole-1.00%IPA-01.0mL\_min1  
 Sample ID :  
 Tray# : 1  
 Vial # : 1  
 Injection Volume : 1 uL  
 Data File Name : RAC-ZJG-2-206-1-DPEPhos-bromobnindole-1.00%IPA-01.0mL\_min1.lcd  
 Method File Name : Cyclic Urea Method.lcm  
 Batch File Name :  
 Report File Name : Default.lcr  
 Data Acquired : 5/16/2015 11:18:00 AM  
 Data Processed : 5/16/2015 12:05:19 PM

### <Chromatogram>

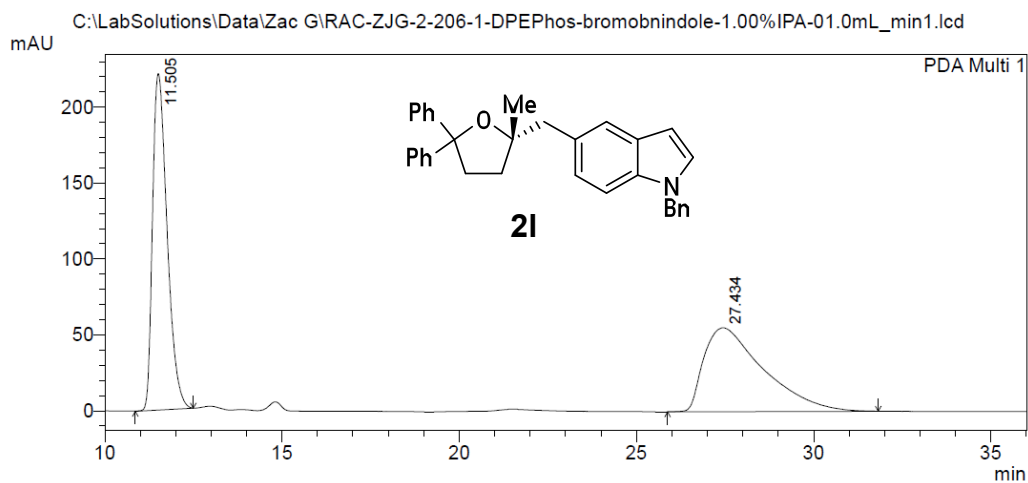

PeakTable

| Peak# | Ret. Time | Area     | Height | Area %  | Height % |
|-------|-----------|----------|--------|---------|----------|
| 1     | 11.505    | 6336323  | 221869 | 49.463  | 80.036   |
| 2     | 27.434    | 6473788  | 55341  | 50.537  | 19.964   |
| Total |           | 12810111 | 277211 | 100.000 | 100.000  |

C:\LabSolutions\Data\Zac G\RAC-ZJG-2-206-1-DPEPhos-bromobnindole-1.00%IPA-01.0mL\_min1.lcd

## ==== Shimadzu LCsolution Analysis Report ====

C:\LabSolutions\Data\Zac G\CHIRAL-ZJG-3-6-A-Bligand-bromobnindole-1.0%IPA-01.0mL\_minAD1.lcd  
 Acquired by : Admin  
 Sample Name : CHIRAL-ZJG-3-6-A-Bligand-bromobnindole-1.0%IPA-01.0mL\_minAD1  
 Sample ID :  
 Tray# : 1  
 Vail # : 1  
 Injection Volume : 1 uL  
 Data File Name : CHIRAL-ZJG-3-6-A-Bligand-bromobnindole-1.0%IPA-01.0mL\_minAD1.lcd  
 Method File Name : Cyclic Urea Method.lcm  
 Batch File Name :  
 Report File Name : Default.lcr  
 Data Acquired : 5/16/2015 12:06:37 PM  
 Data Processed : 5/16/2015 1:06:37 PM

### <Chromatogram>

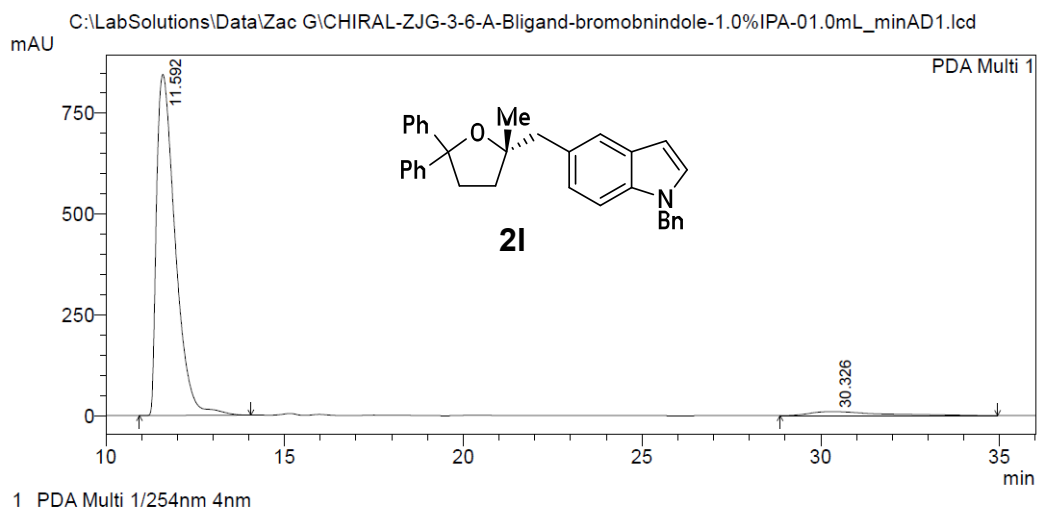

PeakTable

PDA Ch1 254nm 4nm

| Peak# | Ret. Time | Area     | Height | Area %  | Height % |
|-------|-----------|----------|--------|---------|----------|
| 1     | 11.592    | 30684412 | 846134 | 95.635  | 98.815   |
| 2     | 30.326    | 1400511  | 10144  | 4.365   | 1.185    |
| Total |           | 32084923 | 856277 | 100.000 | 100.000  |

C:\LabSolutions\Data\Zac G\CHIRAL-ZJG-3-6-A-Bligand-bromobnindole-1.0%IPA-01.0mL\_minAD1.lcd

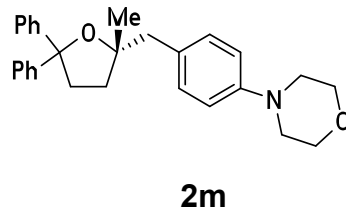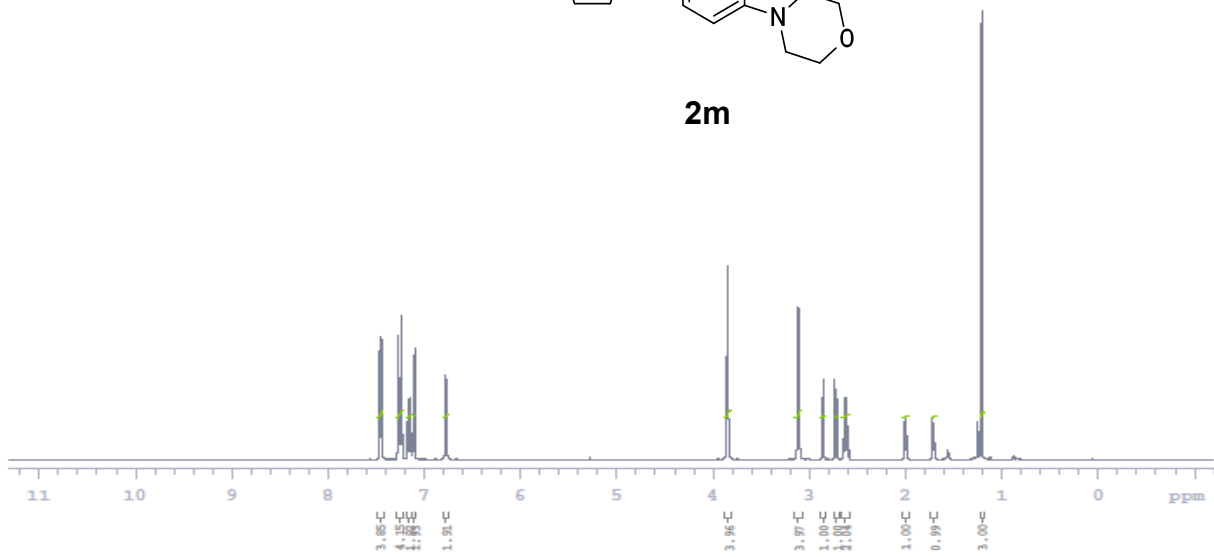

Data file: /misc/Y/berblum/garietcz/vnmr5ys/data/zgg.jpw.2.205.3.H1.fid

Plot date: 2015-05-14

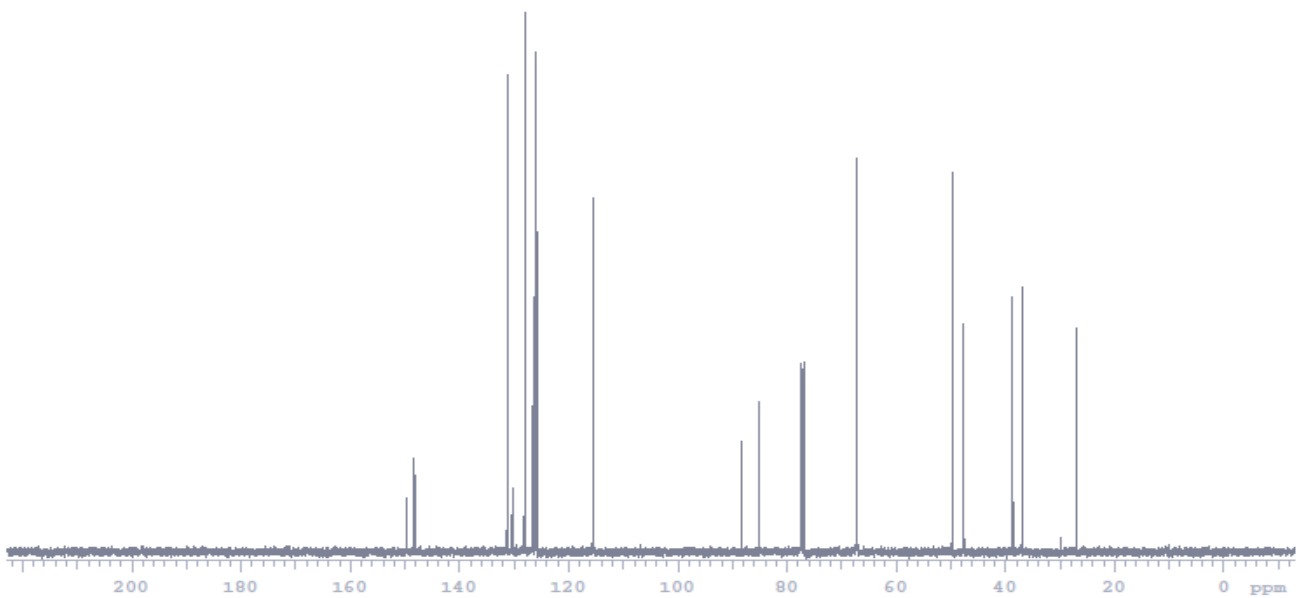

Data file: /home/garietcz/vnmr5ys/data/zgg.jpw.2.205.6.C13.fid

Plot date: 2015-05-14

## ==== Shimadzu LCsolution Analysis Report ====

C:\LabSolutions\Data\Zac G\RAC-ZJG-2-201B-1-DPEPhos-4bromobenzomorpholi-2.00%IPA-01.0mL\_min2.lcd  
 Acquired by : Admin  
 Sample Name : RAC-ZJG-2-201B-1-DPEPhos-4bromobenzomorpholi-2.00%IPA-01.0mL\_min  
 Sample ID :  
 Tray# : 1  
 Vail # : 1  
 Injection Volume : 1 uL  
 Data File Name : RAC-ZJG-2-201B-1-DPEPhos-4bromobenzomorpholi-2.00%IPA-01.0mL\_min2.lcd  
 Method File Name : Cyclic Urea Method.lcm  
 Batch File Name :  
 Report File Name : Default.lcr  
 Data Acquired : 5/14/2015 5:17:10 PM  
 Data Processed : 5/14/2015 5:34:30 PM

### <Chromatogram>

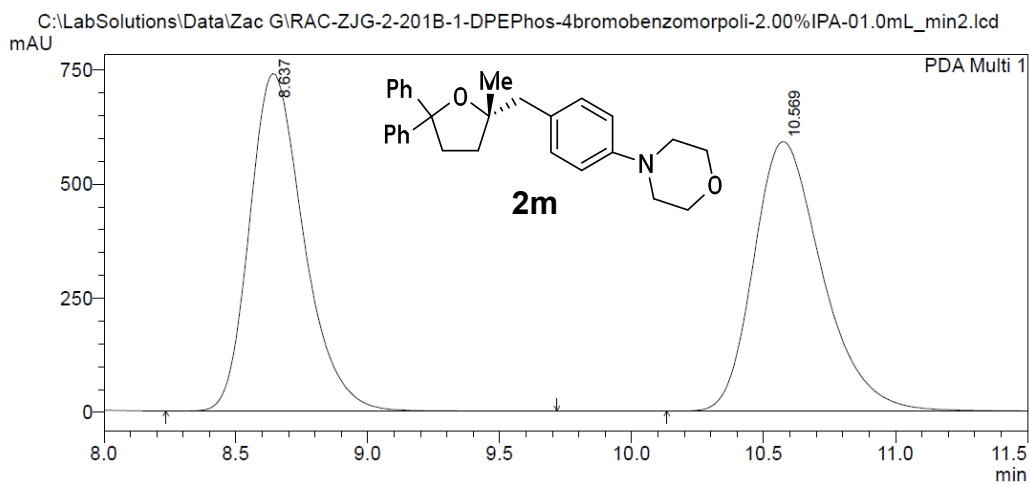

PeakTable

| PDA Ch1 210nm 4nm |           |          |         |         |          |  |
|-------------------|-----------|----------|---------|---------|----------|--|
| Peak#             | Ret. Time | Area     | Height  | Area %  | Height % |  |
| 1                 | 8.637     | 10540544 | 739139  | 49.688  | 55.597   |  |
| 2                 | 10.569    | 10672771 | 590323  | 50.312  | 44.403   |  |
| Total             |           | 21213314 | 1329462 | 100.000 | 100.000  |  |

C:\LabSolutions\Data\Zac G\RAC-ZJG-2-201B-1-DPEPhos-4bromobenzomorpholi-2.00%IPA-01.0mL\_min2.lcd

## ==== Shimadzu LCsolution Analysis Report ====

C:\LabSolutions\Data\Zac G\CHIRAL-ZJG-2-205-1-4bromobenzomorpoli-2.00%IPA-01.0mL\_min.lcd  
 Acquired by : Admin  
 Sample Name : CHIRAL-ZJG-2-205-1-4bromobenzomorpoli-2.00%IPA-01.0mL\_min  
 Sample ID :  
 Tray# : 1  
 Vial # : 1  
 Injection Volume : 1 uL  
 Data File Name : CHIRAL-ZJG-2-205-1-4bromobenzomorpoli-2.00%IPA-01.0mL\_min.lcd  
 Method File Name : Cyclic Urea Method.lcm  
 Batch File Name :  
 Report File Name : Default.lcr  
 Data Acquired : 5/11/2015 12:11:49 PM  
 Data Processed : 5/11/2015 12:32:52 PM

### <Chromatogram>

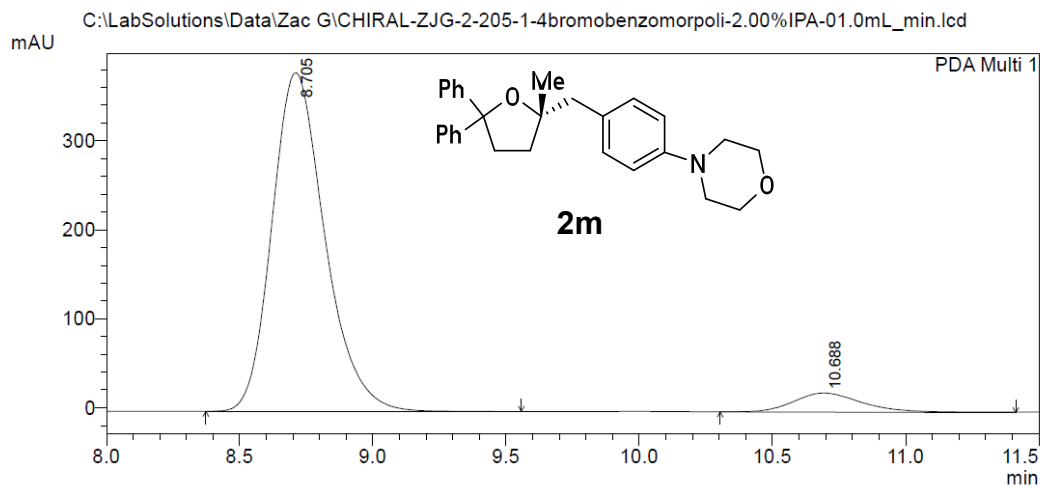

PeakTable

| PDA Ch1 210nm 4nm |           |         |        |         |          |
|-------------------|-----------|---------|--------|---------|----------|
| Peak#             | Ret. Time | Area    | Height | Area %  | Height % |
| 1                 | 8.705     | 5254484 | 380375 | 93.034  | 94.651   |
| 2                 | 10.688    | 393455  | 21497  | 6.966   | 5.349    |
| Total             |           | 5647939 | 401872 | 100.000 | 100.000  |

C:\LabSolutions\Data\Zac G\CHIRAL-ZJG-2-205-1-4bromobenzomorpoli-2.00%IPA-01.0mL\_min.lcd

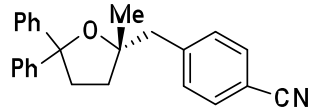

2n

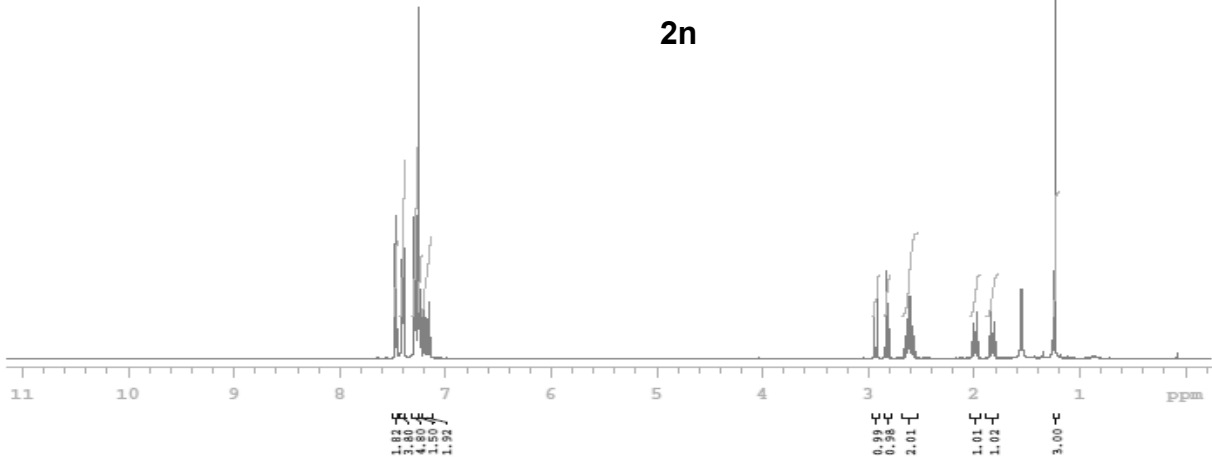

Data file: /misc/Teikurum/garietcz/vnmr/sys/data/zgg\_jpw.3.5.6.H1.fid

Plot date: 2015-05-16

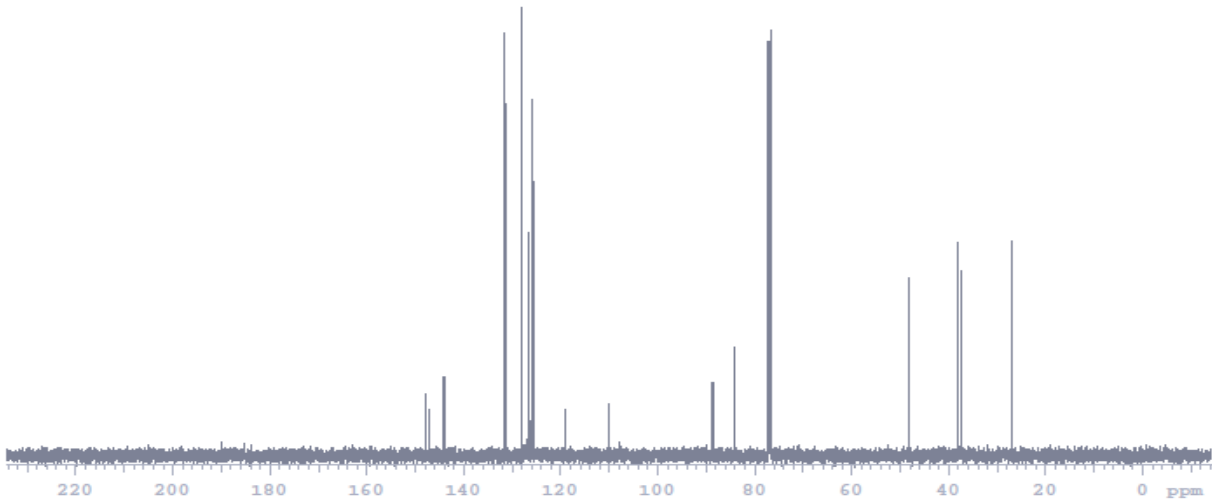

Data file: /misc/Teikurum/garietcz/vnmr/sys/data/zgg\_jpw.3.5.4.C13.fid

Plot date: 2015-05-16

## ==== Shimadzu LCsolution Analysis Report ====

C:\LabSolutions\Data\Zac G\RAC-ZJG-2-207-1-DPEPhos-bromo4benzonitrile-2.00%IPA-01.0mL\_min.lcd  
 Acquired by : Admin  
 Sample Name : RAC-ZJG-2-207-1-DPEPhos-bromo4benzonitrile-2.00%IPA-01.0mL\_min.  
 Sample ID :  
 Tray# : 1  
 Vial # : 1  
 Injection Volume : 1 uL  
 Data File Name : RAC-ZJG-2-207-1-DPEPhos-bromo4benzonitrile-2.00%IPA-01.0mL\_min.lcd  
 Method File Name : Cyclic Urea Method.lcm  
 Batch File Name :  
 Report File Name : Default.lcr  
 Data Acquired : 5/12/2015 3:11:17 PM  
 Data Processed : 5/12/2015 3:20:54 PM

### <Chromatogram>

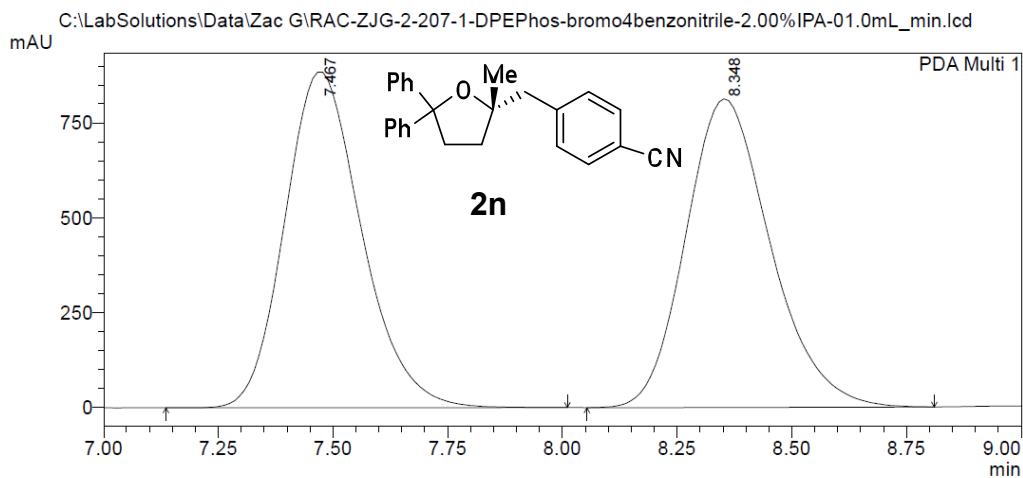

PeakTable

| Peak# | Ret. Time | Area     | Height  | Area %  | Height % |
|-------|-----------|----------|---------|---------|----------|
| 1     | 7.467     | 10329364 | 884476  | 49.713  | 52.115   |
| 2     | 8.348     | 10448562 | 812688  | 50.287  | 47.885   |
| Total |           | 20777926 | 1697164 | 100.000 | 100.000  |

C:\LabSolutions\Data\Zac G\RAC-ZJG-2-207-1-DPEPhos-bromo4benzonitrile-2.00%IPA-01.0mL\_min.lcd



## ==== Shimadzu LCsolution Analysis Report ====

C:\LabSolutions\Data\Zac G\CHIRAL-ZJG-3-2-Bligand-bromobenzonitr-2.00%IPA-01.0mL\_min1ADH.lcd  
 Acquired by : Admin  
 Sample Name : RAC-ZJG-3-2-DPEPhos-bromobenzonitr-2.00%IPA-01.0mL\_min1ADH  
 Sample ID :  
 Tray# : 1  
 Vial # : 1  
 Injection Volume : 1 uL  
 Data File Name : CHIRAL-ZJG-3-2-Bligand-bromobenzonitr-2.00%IPA-01.0mL\_min1ADH.lcd  
 Method File Name : Cyclic Urea Method.lcm  
 Batch File Name :  
 Report File Name : Default.lcr  
 Data Acquired : 5/13/2015 4:39:14 PM  
 Data Processed : 5/13/2015 4:56:56 PM

### <Chromatogram>

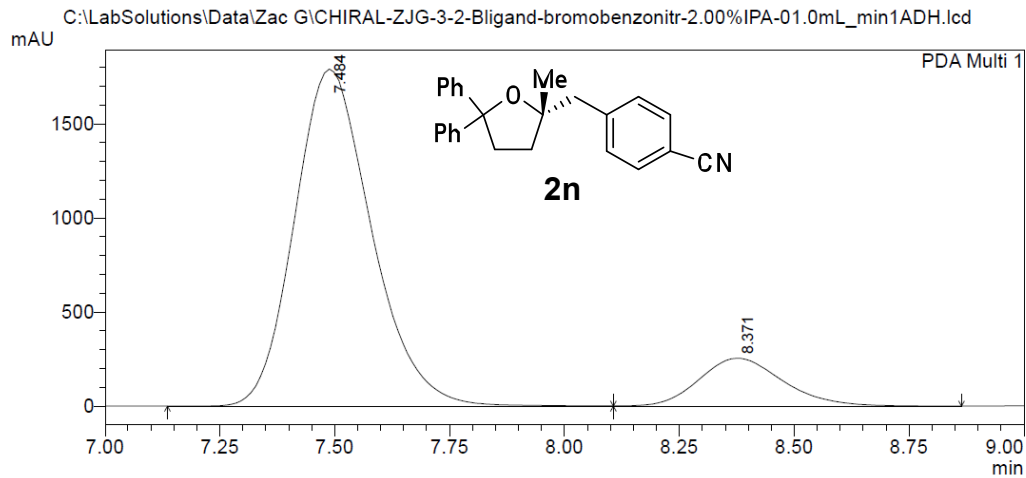

PeakTable

| Peak# | Ret. Time | Area     | Height  | Area %  | Height % |
|-------|-----------|----------|---------|---------|----------|
| 1     | 7.484     | 20895001 | 1791445 | 86.563  | 87.549   |
| 2     | 8.371     | 3243362  | 254773  | 13.437  | 12.451   |
| Total |           | 24138363 | 2046218 | 100.000 | 100.000  |

C:\LabSolutions\Data\Zac G\CHIRAL-ZJG-3-2-Bligand-bromobenzonitr-2.00%IPA-01.0mL\_min1ADH.lcd

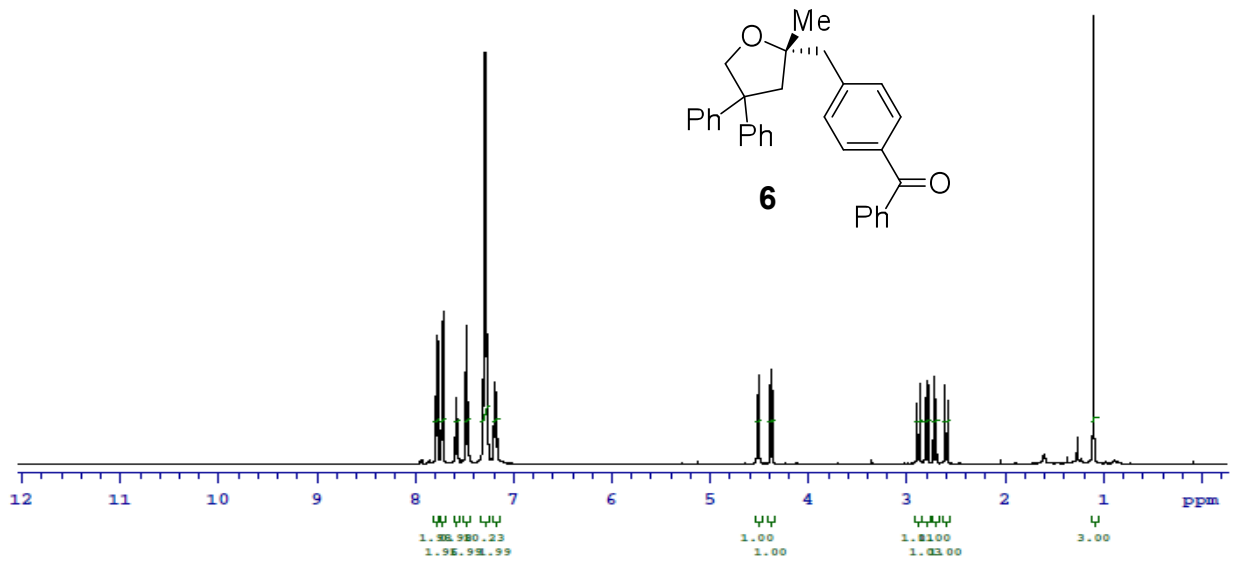

Data file: /misc/Teikurumi/garietzs/vnmr5ys/data/zgg\_jpw.3.97.2nd.5.H1.fid

Plot date: 2015-08-13

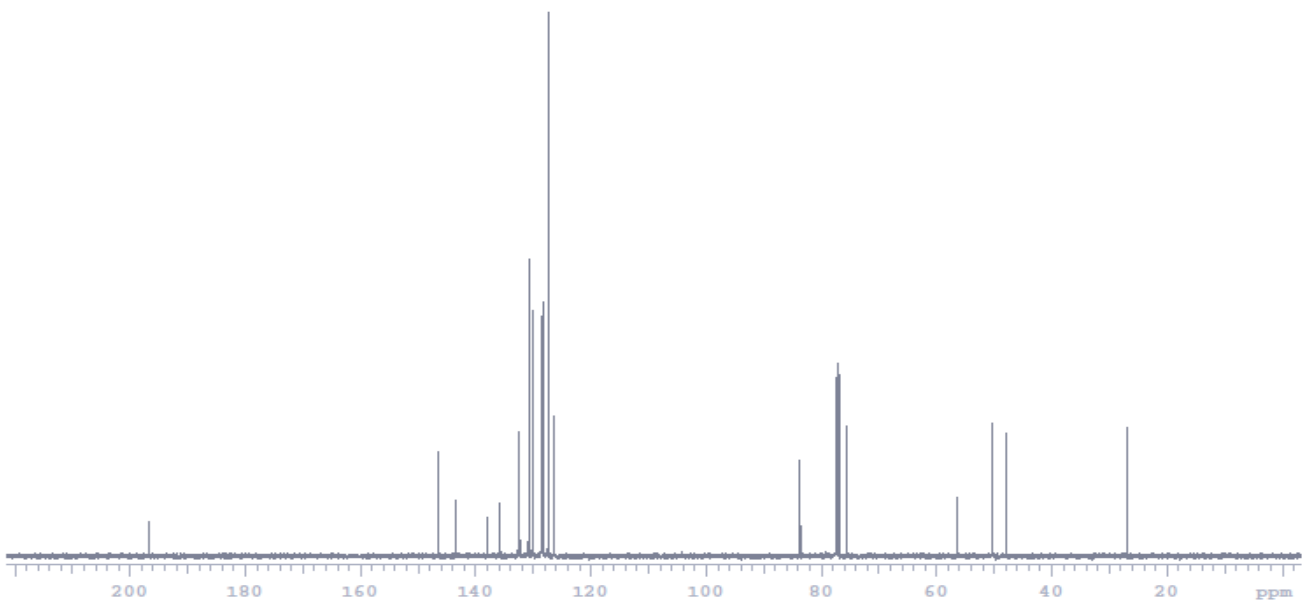

Data file: /home/garietzs/vnmr5ys/data/zgg\_jpw.3.97.5.C13.fid

Plot date: 2015-08-12

## ==== Shimadzu LcSolution Analysis Report ====

C:\LabSolutions\Data\Zac G\THFs\RAC-ZJG-3-96-DPEPhos-benzophenone-5.0%IPA-1.0mL\_minADH.lcd  
 Acquired by : Admin  
 Sample Name : RAC-ZJG-3-96-DPEPhos-benzophenone-5.0%IPA-1.0mL\_minADH.lcd  
 Sample ID :  
 Tray# : 1  
 Vial # : 1  
 Injection Volume : 1 uL  
 Data File Name : RAC-ZJG-3-96-DPEPhos-benzophenone-5.0%IPA-1.0mL\_minADH.lcd  
 Method File Name : Cyclic Urea Method.lcm  
 Batch File Name :  
 Report File Name : Default.lcr  
 Data Acquired : 8/14/2015 11:04:13 AM  
 Data Processed : 8/14/2015 11:29:30 AM

### <Chromatogram>

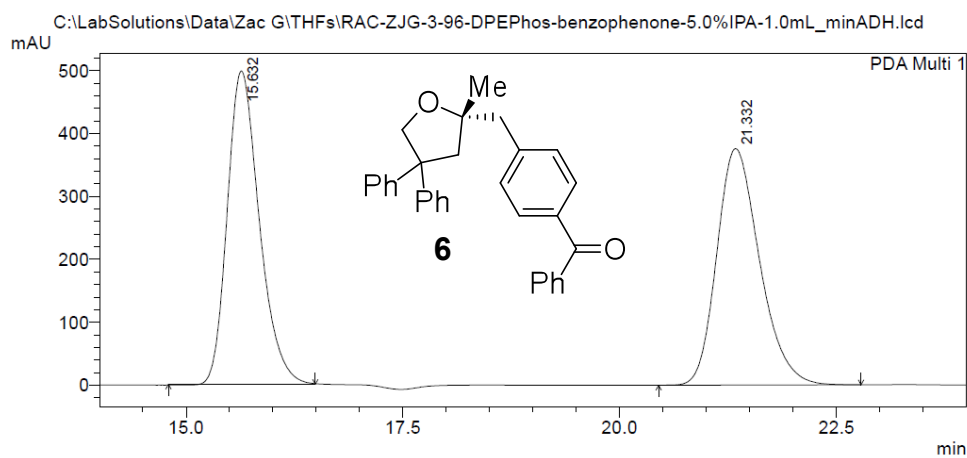

1 PDA Multi 1/254nm 4nm

PeakTable

| PDA Ch1 254nm 4nm |           |          |        |         |          |  |
|-------------------|-----------|----------|--------|---------|----------|--|
| Peak#             | Ret. Time | Area     | Height | Area %  | Height % |  |
| 1                 | 15.632    | 12769339 | 498328 | 49.746  | 57.006   |  |
| 2                 | 21.332    | 12899764 | 375837 | 50.254  | 42.994   |  |
| Total             |           | 25669103 | 874165 | 100.000 | 100.000  |  |

C:\LabSolutions\Data\Zac G\THFs\RAC-ZJG-3-96-DPEPhos-benzophenone-5.0%IPA-1.0mL\_minADH.lcd

## ==== Shimadzu LcSolution Analysis Report ====

C:\LabSolutions\Data\Zac G\THFs\CHIRAL-ZJG-3-97-1st-L7-benzophenone-5.0%IPA-1.0mL\_minADH.lcd  
 Acquired by : Admin  
 Sample Name : CHIRAL-ZJG-3-97-1st-L7-benzophenone-5.0%IPA-1.0mL\_minADH.lcd  
 Sample ID :  
 Tray# : 1  
 Vial # : 1  
 Injection Volume : 1 uL  
 Data File Name : CHIRAL-ZJG-3-97-1st-L7-benzophenone-5.0%IPA-1.0mL\_minADH.lcd  
 Method File Name : Cyclic Urea Method.lcm  
 Batch File Name :  
 Report File Name : Default.lcr  
 Data Acquired : 8/14/2015 11:33:50 AM  
 Data Processed : 8/14/2015 11:59:52 AM

### <Chromatogram>

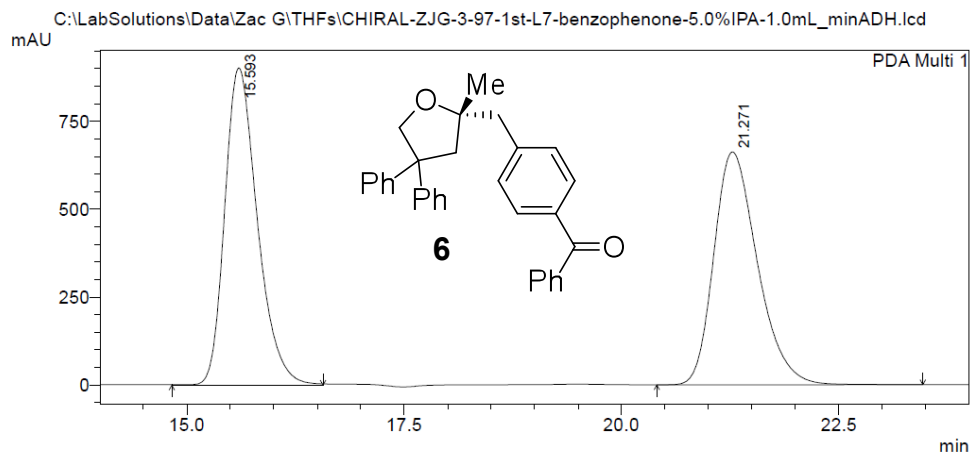

1 PDA Multi 1/254nm 4nm

PeakTable

PDA Ch1 254nm 4nm

| Peak# | Ret. Time | Area     | Height  | Area %  | Height % |
|-------|-----------|----------|---------|---------|----------|
| 1     | 15.593    | 23625033 | 903116  | 50.544  | 57.673   |
| 2     | 21.271    | 23116394 | 662804  | 49.456  | 42.327   |
| Total |           | 46741427 | 1565920 | 100.000 | 100.000  |

C:\LabSolutions\Data\Zac G\THFs\CHIRAL-ZJG-3-97-1st-L7-benzophenone-5.0%IPA-1.0mL\_minADH.lcd
